# Supplementary material for: Machine learning prediction of DOC–water partitioning coefficients for organic pollutants from diverse DOM origins
Source: Royal Society of Chemistry journal article supplement (doi:10.1039/d5em00029g), 2025-01-01
Supplement: d5em00029g1.pdf [file d5em00029g1.pdf]

*Supplementary Information*

**Machine Learning Prediction of DOC-Water Partitioning  
Coefficients for Organic Pollutants from Diverse DOM Origins**

Ruyue Jin<sup>a,b</sup>, Yuzhen Liang<sup>a,b,\*</sup>, Zhenqing Shi<sup>a,b</sup>

<sup>a</sup> School of Environment and Energy, South China University of Technology, Guangzhou, Guangdong 510006, People's Republic of China

<sup>b</sup> The Key Lab of Pollution Control and Ecosystem Restoration in Industry Clusters, Ministry of Education, South China University of Technology, Guangzhou, Guangdong 510006, People's Republic of China

**Corresponding Author\***

Yuzhen Liang

Address: School of Environment and Energy, South China University of Technology, Guangzhou, Guangdong 510006, People's Republic of China

Email: yzliang@scut.edu.cn

4                      pages,                      3                      figure                      in                      total

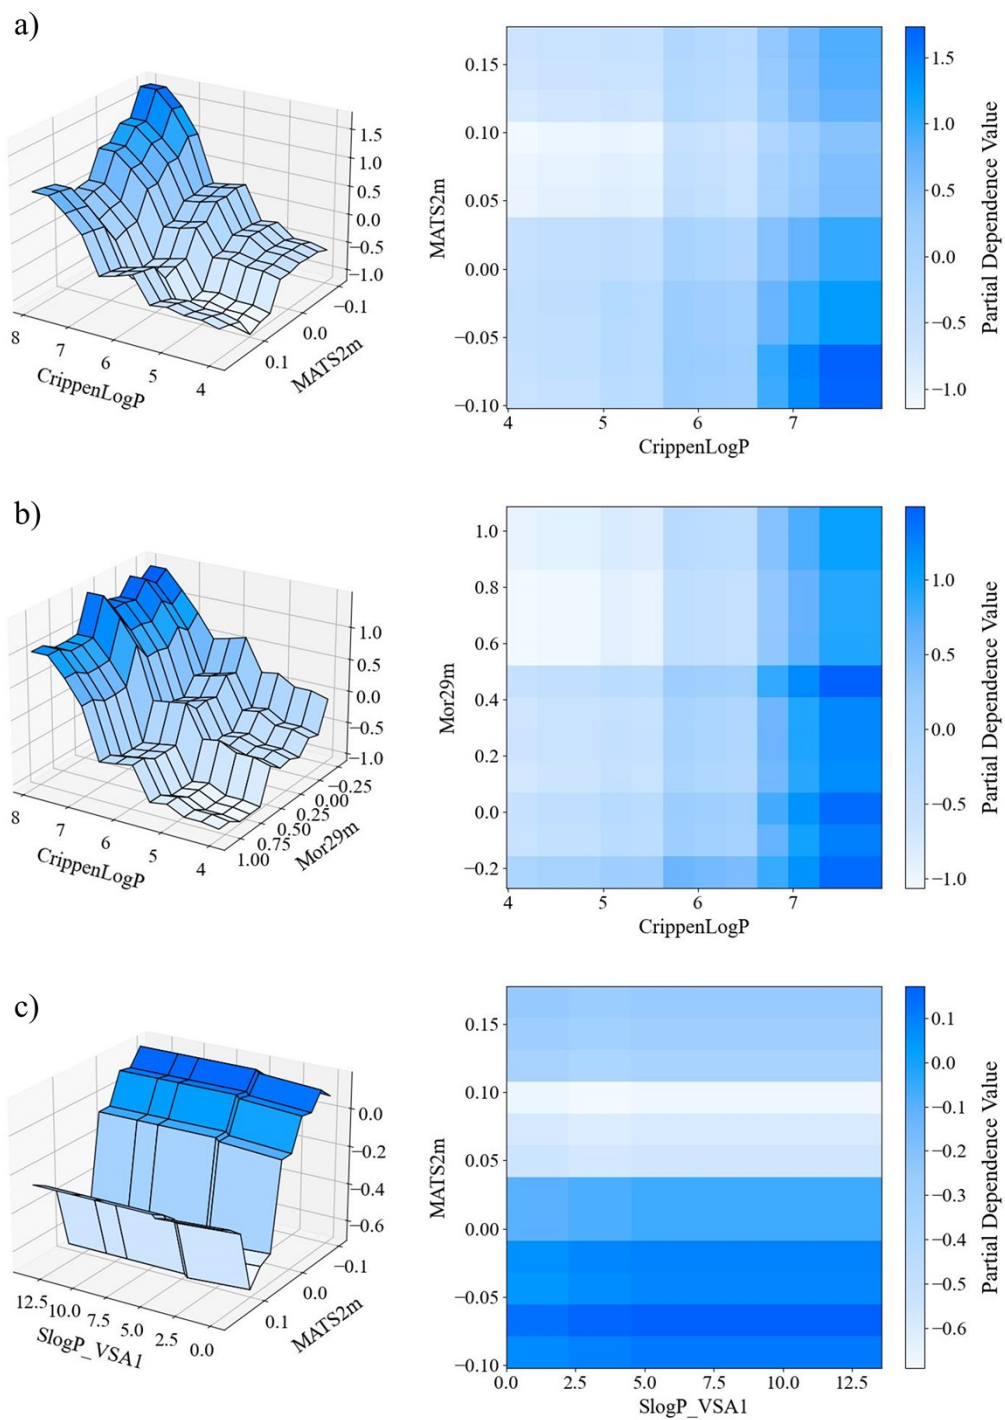

Figure S1. 3D interaction plots and projection diagrams illustrating combined effects of specific feature pairs on  $\log K_{\text{DOC}}$  based on the Natural aquatic DOM model.

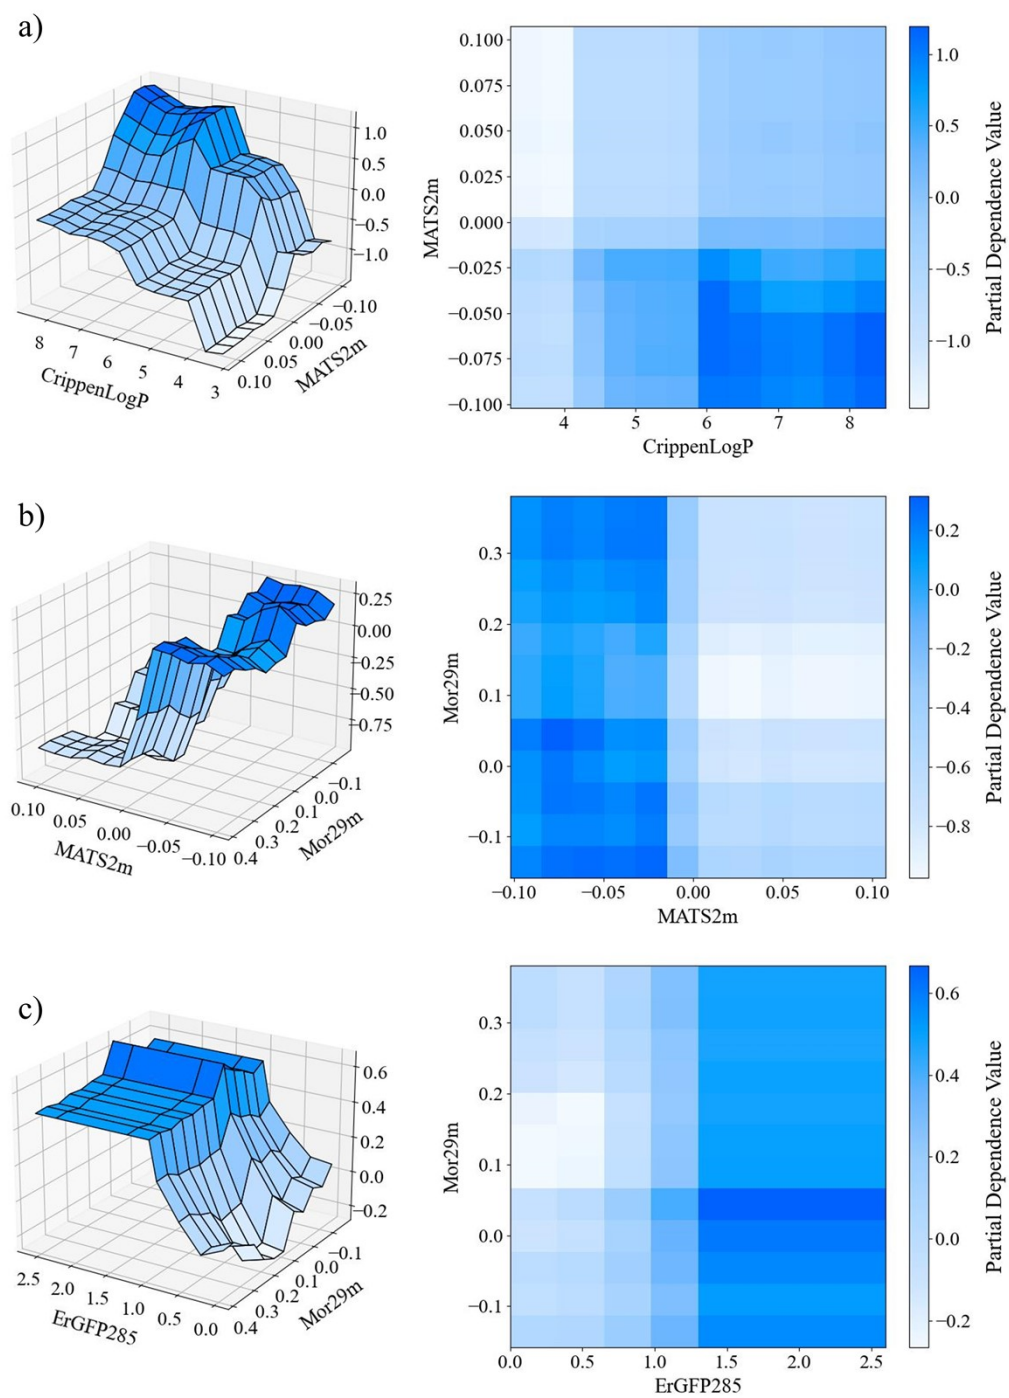

Figure S2. 3D interaction plots and projection diagrams illustrating combined effects of specific feature pairs on  $\log K_{\text{DOC}}$  based on the Natural terrestrial DOM model.

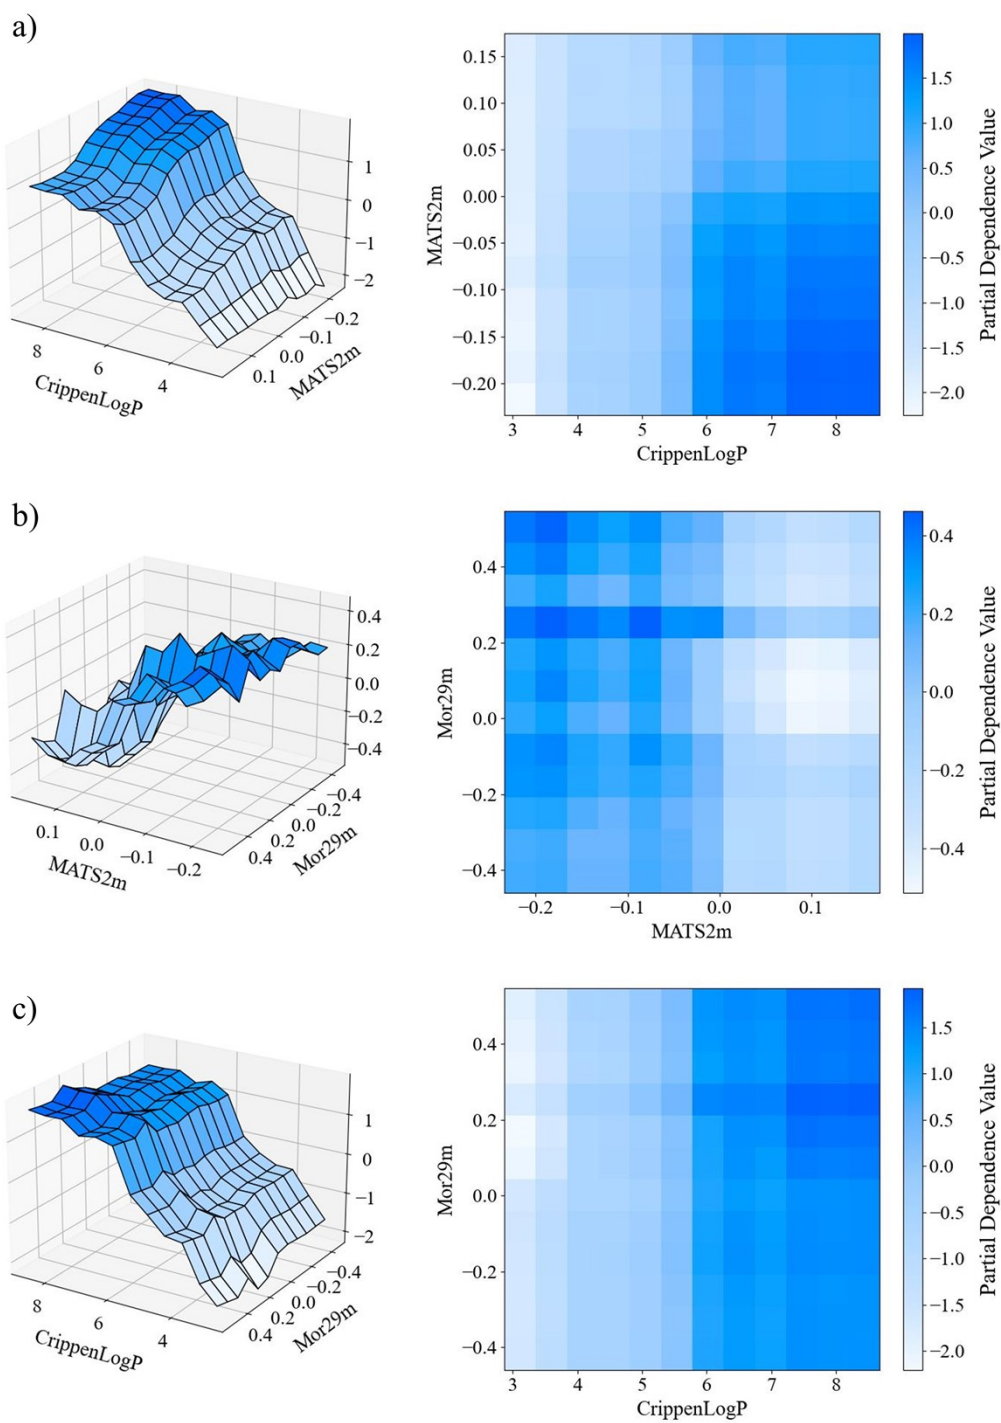

Figure S3. 3D interaction plots and projection diagrams illustrating combined effects of specific feature pairs on  $\log K_{\text{DOC}}$  based on the Commercial DOM model.
