# Supplementary material for: Machine learning prediction of DOC–water partitioning coefficients for organic pollutants from diverse DOM origins
Source: Royal Society of Chemistry journal article supplement (doi:10.1039/d5em00029g), 2025-01-01
Supplement: d5em00029g2.xlsx [file d5em00029g2.xlsx]

## Sheet: Title page
						Supporting Information
						for
	Machine Learning Prediction of DOC-Water Partitioning Coefficients for Organic Pollutants from Diverse DOM Origins
						Ruyue Jin a,b, Yuzhen Liang a,b,*, Zhenqing Shi a,b
	a School of Environment and Energy, South China University of Technology, Guangzhou, Guangdong 510006, People's Republic of China
	b The Key Lab of Pollution Control and Ecosystem Restoration in Industry Clusters, Ministry of Education, South China University of Technology, Guangzhou, Guangdong 510006, People’s Republic of China
	Corresponding author*: Yuzhen Liang; Address: School of Environment and Energy, South China University of Technology, Guangzhou, Guangdong 510006, People's Republic of China; Email: yzliang@scut.edu.cn
CONTENTS
Table S1. Experimental dissolved organic carbon-water partition coefficients (log KDOC).
Table S2. 27 key descriptors obtained after stepsize regression.
Table S3. Comparisions of descriptors, and evaluation metrics for the four optimized algorithms of each model after hyperparameter tuning.
Table S4. The descriptors and tuned hydyperparameters used for the best-performing models from All DOM, Natural Aquatic DOM, Natural Terrestrial DOM, and Commercial DOM
Table S5. Comparisons of machine learning models and pp-LFER models based on similar datasets.

## Sheet: Table S1
Table S1. Experimental dissolved organic carbon-water partition coefficients (log KDOC).
CAS	Chemical	Observed log KDOC	DOM origina	DOM type	Experimental methodb	Temperature	pH	Reference
000050-27-1	estriol	4.96	1	Surface Water HA	FQ	22	7	Yamamoto, H.; Liljestrand, H. M.; Shimizu, Y.; Morita, M. Effects of Physical−Chemical Characteristics on the Sorption of Selected Endocrine Disruptors by Dissolved Organic Matter Surrogates. Environmental Science & Technology 2003, 37 (12), 2646-2657. DOI: 10.1021/es026405w.
000050-27-1	estriol	4.64	1	Surface Water FA	FQ	22	7	Yamamoto, H.; Liljestrand, H. M.; Shimizu, Y.; Morita, M. Effects of Physical−Chemical Characteristics on the Sorption of Selected Endocrine Disruptors by Dissolved Organic Matter Surrogates. Environmental Science & Technology 2003, 37 (12), 2646-2657. DOI: 10.1021/es026405w.
000050-27-1	estriol	4.99	3	Aldrich HA	FQ	22	7	Yamamoto, H.; Liljestrand, H. M.; Shimizu, Y.; Morita, M. Effects of Physical−Chemical Characteristics on the Sorption of Selected Endocrine Disruptors by Dissolved Organic Matter Surrogates. Environmental Science & Technology 2003, 37 (12), 2646-2657. DOI: 10.1021/es026405w.
000050-27-1	estriol	5.32	4	Tannic Acid	FQ	22	7	Yamamoto, H.; Liljestrand, H. M.; Shimizu, Y.; Morita, M. Effects of Physical−Chemical Characteristics on the Sorption of Selected Endocrine Disruptors by Dissolved Organic Matter Surrogates. Environmental Science & Technology 2003, 37 (12), 2646-2657. DOI: 10.1021/es026405w.
000050-28-2	Estradiol	4.15	1	Surface Water FA	SPME	25	7	Neale, P. A.; Escher, B. I.; Schäfer, A. I. Quantification of Solute–Solute Interactions Using Negligible-Depletion Solid-Phase Microextraction: Measuring the Affinity of Estradiol to Bulk Organic Matter. Environmental Science & Technology 2008, 42 (8), 2886-2892. DOI: 10.1021/es0717313.
000050-28-2	Estradiol	3.99	1	Surface Water HA	SPME	25	7	Neale, P. A.; Escher, B. I.; Schäfer, A. I. Quantification of Solute–Solute Interactions Using Negligible-Depletion Solid-Phase Microextraction: Measuring the Affinity of Estradiol to Bulk Organic Matter. Environmental Science & Technology 2008, 42 (8), 2886-2892. DOI: 10.1021/es0717313.
000050-28-2	Estradiol	3.95	1	Surface Water DOM	SPME	25	7	Neale, P. A.; Escher, B. I.; Schäfer, A. I. Quantification of Solute–Solute Interactions Using Negligible-Depletion Solid-Phase Microextraction: Measuring the Affinity of Estradiol to Bulk Organic Matter. Environmental Science & Technology 2008, 42 (8), 2886-2892. DOI: 10.1021/es0717313.
000050-28-2	Estradiol	3.98	1	Surface Water DOM	SPME	25	7	Neale, P. A.; Escher, B. I.; Schäfer, A. I. Quantification of Solute–Solute Interactions Using Negligible-Depletion Solid-Phase Microextraction: Measuring the Affinity of Estradiol to Bulk Organic Matter. Environmental Science & Technology 2008, 42 (8), 2886-2892. DOI: 10.1021/es0717313.
000050-28-2	17β-estradiol	4.92	1	Surface Water HA	FQ	22	7	Yamamoto, H.; Liljestrand, H. M.; Shimizu, Y.; Morita, M. Effects of Physical−Chemical Characteristics on the Sorption of Selected Endocrine Disruptors by Dissolved Organic Matter Surrogates. Environmental Science & Technology 2003, 37 (12), 2646-2657. DOI: 10.1021/es026405w.
000050-28-2	17β-estradiol	4.57	1	Surface Water FA	FQ	22	7	Yamamoto, H.; Liljestrand, H. M.; Shimizu, Y.; Morita, M. Effects of Physical−Chemical Characteristics on the Sorption of Selected Endocrine Disruptors by Dissolved Organic Matter Surrogates. Environmental Science & Technology 2003, 37 (12), 2646-2657. DOI: 10.1021/es026405w.
000050-28-2	17β-estradiol	4.61	1	Surface Water FA	FQ	22	7	Yamamoto, H.; Liljestrand, H. M.; Shimizu, Y.; Morita, M. Effects of Physical−Chemical Characteristics on the Sorption of Selected Endocrine Disruptors by Dissolved Organic Matter Surrogates. Environmental Science & Technology 2003, 37 (12), 2646-2657. DOI: 10.1021/es026405w.
000050-28-2	estradiol	3.23	2	Soil Porewater DOM	SPME	21	5.38	Haftka, J. J. H.; Scherpenisse, P.; Jonker, M. T. O.; Hermens, J. L. M. Using Polyacrylate-Coated SPME Fibers To Quantify Sorption of Polar and Ionic Organic Contaminants to Dissolved Organic Carbon. Environmental Science & Technology 2013, 47 (9), 4455-4462. DOI: 10.1021/es400236a.
000050-28-2	Estradiol	4.21	3	Aldrich HA	SPME	25	7	Neale, P. A.; Escher, B. I.; Schäfer, A. I. pH dependence of steroid hormone—organic matter interactions at environmental concentrations. Science of The Total Environment 2009, 407 (3), 1164-1173. DOI: https://doi.org/10.1016/j.scitotenv.2008.09.035.
000050-28-2	Estradiol	4.21	3	Aldrich HA	SPME	25	7	Neale, P. A.; Escher, B. I.; Schäfer, A. I. Quantification of Solute–Solute Interactions Using Negligible-Depletion Solid-Phase Microextraction: Measuring the Affinity of Estradiol to Bulk Organic Matter. Environmental Science & Technology 2008, 42 (8), 2886-2892. DOI: 10.1021/es0717313.
000050-28-2	17β-estradiol	4.94	3	Aldrich HA	FQ	22	7	Yamamoto, H.; Liljestrand, H. M.; Shimizu, Y.; Morita, M. Effects of Physical−Chemical Characteristics on the Sorption of Selected Endocrine Disruptors by Dissolved Organic Matter Surrogates. Environmental Science & Technology 2003, 37 (12), 2646-2657. DOI: 10.1021/es026405w.
000050-28-2	Estradiol	3.96	4	Alginic acid	SPME	25	7	Neale, P. A.; Escher, B. I.; Schäfer, A. I. pH dependence of steroid hormone—organic matter interactions at environmental concentrations. Science of The Total Environment 2009, 407 (3), 1164-1173. DOI: https://doi.org/10.1016/j.scitotenv.2008.09.035.
000050-28-2	Estradiol	4.86	4	Tannic acid	SPME	25	7	Neale, P. A.; Escher, B. I.; Schäfer, A. I. pH dependence of steroid hormone—organic matter interactions at environmental concentrations. Science of The Total Environment 2009, 407 (3), 1164-1173. DOI: https://doi.org/10.1016/j.scitotenv.2008.09.035.
000050-28-2	Estradiol	3.96	4	Alginic acid	SPME	25	7	Neale, P. A.; Escher, B. I.; Schäfer, A. I. Quantification of Solute–Solute Interactions Using Negligible-Depletion Solid-Phase Microextraction: Measuring the Affinity of Estradiol to Bulk Organic Matter. Environmental Science & Technology 2008, 42 (8), 2886-2892. DOI: 10.1021/es0717313.
000050-28-2	Estradiol	3.75	4	Powder cellulose	SPME	25	7	Neale, P. A.; Escher, B. I.; Schäfer, A. I. Quantification of Solute–Solute Interactions Using Negligible-Depletion Solid-Phase Microextraction: Measuring the Affinity of Estradiol to Bulk Organic Matter. Environmental Science & Technology 2008, 42 (8), 2886-2892. DOI: 10.1021/es0717313.
000050-28-2	Estradiol	3.94	4	Colloidal cellulose	SPME	25	7	Neale, P. A.; Escher, B. I.; Schäfer, A. I. Quantification of Solute–Solute Interactions Using Negligible-Depletion Solid-Phase Microextraction: Measuring the Affinity of Estradiol to Bulk Organic Matter. Environmental Science & Technology 2008, 42 (8), 2886-2892. DOI: 10.1021/es0717313.
000050-28-2	Estradiol	4.86	4	Tannic acid	SPME	25	7	Neale, P. A.; Escher, B. I.; Schäfer, A. I. Quantification of Solute–Solute Interactions Using Negligible-Depletion Solid-Phase Microextraction: Measuring the Affinity of Estradiol to Bulk Organic Matter. Environmental Science & Technology 2008, 42 (8), 2886-2892. DOI: 10.1021/es0717313.
000050-28-2	Estradiol	3.68	4	Sodium dodecyl sulfate micelle	SPME	25	7	Neale, P. A.; Escher, B. I.; Schäfer, A. I. Quantification of Solute–Solute Interactions Using Negligible-Depletion Solid-Phase Microextraction: Measuring the Affinity of Estradiol to Bulk Organic Matter. Environmental Science & Technology 2008, 42 (8), 2886-2892. DOI: 10.1021/es0717313.
000050-28-2	Estradiol	3.96	4	Dextran	SPME	25	7	Neale, P. A.; Escher, B. I.; Schäfer, A. I. Quantification of Solute–Solute Interactions Using Negligible-Depletion Solid-Phase Microextraction: Measuring the Affinity of Estradiol to Bulk Organic Matter. Environmental Science & Technology 2008, 42 (8), 2886-2892. DOI: 10.1021/es0717313.
000050-29-3	p,p'-DDT	5.57	3	Aldrich HA	nd-SPME		7	Urrestarazu Ramos, E.; Meijer, S. N.; Vaes, W. H. J.; Verhaar, H. J. M.; Hermens, J. L. M. Using Solid-Phase Microextraction To Determine Partition Coefficients to Humic Acids and Bioavailable Concentrations of Hydrophobic Chemicals. Environmental Science & Technology 1998, 32 (21), 3430-3435. DOI: 10.1021/es980274a.
000050-29-3	p,p'-DDT	5.98	3	Aldrich HA	passive sampling	25	7	Freidig, A. P.; Garicano, E. A.; Busser, F. J. M.; Hermens, J. L. M. Estimating impact of humic acid on bioavailability and bioaccumulation of hydrophobic chemicals in guppies using kinetic solid‐phase extraction. Environmental toxicology and chemistry 1998, 17.
000050-32-8	benzo[a]pyrene	6.2	1	Surface Water DOM	POM-SPE-C14	20	7	Kuivikko, M.; Sorsa, K.; Kukkonen, J. V. K.; Akkanen, J.; Kotiaho, T.; Vähätalo, A. V. Partitioning of tetra- and pentabromo diphenyl ether and benzo[a]pyrene among water and dissolved and particulate organic carbon along a salinity gradient in coastal waters. Environmental toxicology and chemistry 2010, 29 (11), 2443-2449. DOI: 10.1002/etc.308 PubMed.
000050-32-8	benzo[a]pyrene	6.31	1	Surface Water DOM	POM-SPE-C12	20	7	Kuivikko, M.; Sorsa, K.; Kukkonen, J. V. K.; Akkanen, J.; Kotiaho, T.; Vähätalo, A. V. Partitioning of tetra- and pentabromo diphenyl ether and benzo[a]pyrene among water and dissolved and particulate organic carbon along a salinity gradient in coastal waters. Environmental toxicology and chemistry 2010, 29 (11), 2443-2449. DOI: 10.1002/etc.308 PubMed.
000050-32-8	benzo[a]pyrene	5.64	1	Sediment Porewater DOM	SPME			Hawthorne, S. B.; Grabanski, C. B.; Miller, D. J.; Kreitinger, J. P. Solid-Phase Microextraction Measurement of Parent and Alkyl Polycyclic Aromatic Hydrocarbons in Milliliter Sediment Pore Water Samples and Determination of KDOC Values. Environmental Science & Technology 2005, 39 (8), 2795-2803. DOI: 10.1021/es0405171.
000050-32-8	benzo[a]pyrene	5.31	1	Sediment Porewater DOM	SPME			Hawthorne, S. B.; Grabanski, C. B.; Miller, D. J.; Kreitinger, J. P. Solid-Phase Microextraction Measurement of Parent and Alkyl Polycyclic Aromatic Hydrocarbons in Milliliter Sediment Pore Water Samples and Determination of KDOC Values. Environmental Science & Technology 2005, 39 (8), 2795-2803. DOI: 10.1021/es0405171.
000050-32-8	benzo[a]pyrene	4.59	1	Sediment Porewater DOM	SPME			Hawthorne, S. B.; Grabanski, C. B.; Miller, D. J.; Kreitinger, J. P. Solid-Phase Microextraction Measurement of Parent and Alkyl Polycyclic Aromatic Hydrocarbons in Milliliter Sediment Pore Water Samples and Determination of KDOC Values. Environmental Science & Technology 2005, 39 (8), 2795-2803. DOI: 10.1021/es0405171.
000050-32-8	benzo[a]pyrene	4.88	1	Sediment Porewater DOM	SPME			Hawthorne, S. B.; Grabanski, C. B.; Miller, D. J.; Kreitinger, J. P. Solid-Phase Microextraction Measurement of Parent and Alkyl Polycyclic Aromatic Hydrocarbons in Milliliter Sediment Pore Water Samples and Determination of KDOC Values. Environmental Science & Technology 2005, 39 (8), 2795-2803. DOI: 10.1021/es0405171.
000050-32-8	Benzo(a)pyrene	6.49	2	Soil Porewater DOM	Static Leaching (ER-H) and Passive Sampling (POM)	room temperature	4.7~8.63	Enell, A.; Lundstedt, S.; Arp, H. P. H.; Josefsson, S.; Cornelissen, G.; Wik, O.; Berggren Kleja, D. Combining Leaching and Passive Sampling To Measure the Mobility and Distribution between Porewater, DOC, and Colloids of Native Oxy-PAHs, N-PACs, and PAHs in Historically Contaminated Soil. Environmental Science & Technology 2016, 50 (21), 11797-11805. DOI: 10.1021/acs.est.6b02774.
000050-32-8	Benzo(a)pyrene	6.84	3	Aldrich HA	Passive dosing	25	7.8	Neale, P. A.; Antony, A.; Gernjak, W.; Leslie, G.; Escher, B. I. Natural versus wastewater derived dissolved organic carbon: Implications for the environmental fate of organic micropollutants. Water Research 2011, 45 (14), 4227-4237. DOI: https://doi.org/10.1016/j.watres.2011.05.038.
000050-32-8	benzo[a]pyrene	7.16	3	Aldrich HA	Passive dosing	25	5.5~7	Kim, S.-J.; Kwon, J.-H. Determination of Partition Coefficients for Selected PAHs between Water and Dissolved Organic Matter. CLEAN – Soil, Air, Water 2010, 38, 797-802. DOI: 10.1002/clen.201000113.
000050-32-8	benzo[a]pyrene	6.44	4	Sodium dodecyl sulfate micelle	Passive dosing	25	5.5~7	Kim, S.-J.; Kwon, J.-H. Determination of Partition Coefficients for Selected PAHs between Water and Dissolved Organic Matter. CLEAN – Soil, Air, Water 2010, 38, 797-802. DOI: 10.1002/clen.201000113.
000053-16-7	Estrone	4.82	3	Aldrich HA	SPME	25	7	Neale, P. A.; Escher, B. I.; Schäfer, A. I. pH dependence of steroid hormone—organic matter interactions at environmental concentrations. Science of The Total Environment 2009, 407 (3), 1164-1173. DOI: https://doi.org/10.1016/j.scitotenv.2008.09.035.
000053-16-7	Estrone	5.51	4	Tannic acid	SPME	25	7	Neale, P. A.; Escher, B. I.; Schäfer, A. I. pH dependence of steroid hormone—organic matter interactions at environmental concentrations. Science of The Total Environment 2009, 407 (3), 1164-1173. DOI: https://doi.org/10.1016/j.scitotenv.2008.09.035.
000053-70-3	Dibenz(ah)anthracene	7.15	2	Soil Porewater DOM	Static Leaching (ER-H) and Passive Sampling (POM)	room temperature	4.7~8.63	Enell, A.; Lundstedt, S.; Arp, H. P. H.; Josefsson, S.; Cornelissen, G.; Wik, O.; Berggren Kleja, D. Combining Leaching and Passive Sampling To Measure the Mobility and Distribution between Porewater, DOC, and Colloids of Native Oxy-PAHs, N-PACs, and PAHs in Historically Contaminated Soil. Environmental Science & Technology 2016, 50 (21), 11797-11805. DOI: 10.1021/acs.est.6b02774.
000053-70-3	Dibenzo(ah)anthracene	6.96	3	Aldrich HA	Passive dosing	25	7.8	Neale, P. A.; Antony, A.; Gernjak, W.; Leslie, G.; Escher, B. I. Natural versus wastewater derived dissolved organic carbon: Implications for the environmental fate of organic micropollutants. Water Research 2011, 45 (14), 4227-4237. DOI: https://doi.org/10.1016/j.watres.2011.05.038.
000053-70-3	dibenzo[a,h]anthracene	7.56	3	Aldrich HA	Passive dosing	25	5.5~7	Kim, S.-J.; Kwon, J.-H. Determination of Partition Coefficients for Selected PAHs between Water and Dissolved Organic Matter. CLEAN – Soil, Air, Water 2010, 38, 797-802. DOI: 10.1002/clen.201000113.
000053-70-3	dibenzo[a,h]anthracene	6.14	4	Sodium dodecyl sulfate micelle	Passive dosing	25	5.5~7	Kim, S.-J.; Kwon, J.-H. Determination of Partition Coefficients for Selected PAHs between Water and Dissolved Organic Matter. CLEAN – Soil, Air, Water 2010, 38, 797-802. DOI: 10.1002/clen.201000113.
000056-55-3	benz[a]anthracene	5.37	1	Sediment Porewater DOM	SPME			Hawthorne, S. B.; Grabanski, C. B.; Miller, D. J.; Kreitinger, J. P. Solid-Phase Microextraction Measurement of Parent and Alkyl Polycyclic Aromatic Hydrocarbons in Milliliter Sediment Pore Water Samples and Determination of KDOC Values. Environmental Science & Technology 2005, 39 (8), 2795-2803. DOI: 10.1021/es0405171.
000056-55-3	benz[a]anthracene	4.96	1	Sediment Porewater DOM	SPME			Hawthorne, S. B.; Grabanski, C. B.; Miller, D. J.; Kreitinger, J. P. Solid-Phase Microextraction Measurement of Parent and Alkyl Polycyclic Aromatic Hydrocarbons in Milliliter Sediment Pore Water Samples and Determination of KDOC Values. Environmental Science & Technology 2005, 39 (8), 2795-2803. DOI: 10.1021/es0405171.
000056-55-3	benz[a]anthracene	4.31	1	Sediment Porewater DOM	SPME			Hawthorne, S. B.; Grabanski, C. B.; Miller, D. J.; Kreitinger, J. P. Solid-Phase Microextraction Measurement of Parent and Alkyl Polycyclic Aromatic Hydrocarbons in Milliliter Sediment Pore Water Samples and Determination of KDOC Values. Environmental Science & Technology 2005, 39 (8), 2795-2803. DOI: 10.1021/es0405171.
000056-55-3	benz[a]anthracene	4.4	1	Sediment Porewater DOM	SPME			Hawthorne, S. B.; Grabanski, C. B.; Miller, D. J.; Kreitinger, J. P. Solid-Phase Microextraction Measurement of Parent and Alkyl Polycyclic Aromatic Hydrocarbons in Milliliter Sediment Pore Water Samples and Determination of KDOC Values. Environmental Science & Technology 2005, 39 (8), 2795-2803. DOI: 10.1021/es0405171.
000056-55-3	Benz(a)anthracene	5.68	2	Soil Porewater DOM	Static Leaching (ER-H) and Passive Sampling (POM)	room temperature	4.7~8.63	Enell, A.; Lundstedt, S.; Arp, H. P. H.; Josefsson, S.; Cornelissen, G.; Wik, O.; Berggren Kleja, D. Combining Leaching and Passive Sampling To Measure the Mobility and Distribution between Porewater, DOC, and Colloids of Native Oxy-PAHs, N-PACs, and PAHs in Historically Contaminated Soil. Environmental Science & Technology 2016, 50 (21), 11797-11805. DOI: 10.1021/acs.est.6b02774.
000056-55-3	benz[a]anthracene	6.28	3	Aldrich HA	Solid Phase Dosing and Sampling	21	7.03~7.82	ter Laak, T. L.; Durjava, M.; Struijs, J.; Hermens, J. L. M. Solid Phase Dosing and Sampling Technique To Determine Partition Coefficients of Hydrophobic Chemicals in Complex Matrixes. Environmental Science & Technology 2005, 39 (10), 3736-3742. DOI: 10.1021/es048406p.
000056-55-3	Benz[a]anthracene	5.49	3	Roth HA	SPME	25	7	Ahmadi, F.; Sparham, C.; Pawliszyn, J. A flow-through aqueous standard generation system for thin film microextraction investigations of UV filters and biocides partitioning to different environmental compartments. Environmental Pollution 2017, 230, 663-673. DOI: https://doi.org/10.1016/j.envpol.2017.06.092.
000057-63-6	17α-ethynylestradiol	4.8	1	Surface Water HA	FQ	22	7	Yamamoto, H.; Liljestrand, H. M.; Shimizu, Y.; Morita, M. Effects of Physical−Chemical Characteristics on the Sorption of Selected Endocrine Disruptors by Dissolved Organic Matter Surrogates. Environmental Science & Technology 2003, 37 (12), 2646-2657. DOI: 10.1021/es026405w.
000057-63-6	17α-ethynylestradiol	4.55	1	Surface Water FA	FQ	22	7	Yamamoto, H.; Liljestrand, H. M.; Shimizu, Y.; Morita, M. Effects of Physical−Chemical Characteristics on the Sorption of Selected Endocrine Disruptors by Dissolved Organic Matter Surrogates. Environmental Science & Technology 2003, 37 (12), 2646-2657. DOI: 10.1021/es026405w.
000057-63-6	17α-ethynylestradiol	4.63	1	Surface Water FA	FQ	22	7	Yamamoto, H.; Liljestrand, H. M.; Shimizu, Y.; Morita, M. Effects of Physical−Chemical Characteristics on the Sorption of Selected Endocrine Disruptors by Dissolved Organic Matter Surrogates. Environmental Science & Technology 2003, 37 (12), 2646-2657. DOI: 10.1021/es026405w.
000057-63-6	17α-ethynylestradiol	4.78	3	Aldrich HA	FQ	22	7	Yamamoto, H.; Liljestrand, H. M.; Shimizu, Y.; Morita, M. Effects of Physical−Chemical Characteristics on the Sorption of Selected Endocrine Disruptors by Dissolved Organic Matter Surrogates. Environmental Science & Technology 2003, 37 (12), 2646-2657. DOI: 10.1021/es026405w.
000057-63-6	17α-ethynylestradiol	5.22	4	Tannic Acid	FQ	22	7	Yamamoto, H.; Liljestrand, H. M.; Shimizu, Y.; Morita, M. Effects of Physical−Chemical Characteristics on the Sorption of Selected Endocrine Disruptors by Dissolved Organic Matter Surrogates. Environmental Science & Technology 2003, 37 (12), 2646-2657. DOI: 10.1021/es026405w.
000057-83-0	Progesterone	4.59	3	Aldrich HA	SPME	25	7	Neale, P. A.; Escher, B. I.; Schäfer, A. I. pH dependence of steroid hormone—organic matter interactions at environmental concentrations. Science of The Total Environment 2009, 407 (3), 1164-1173. DOI: https://doi.org/10.1016/j.scitotenv.2008.09.035.
000057-83-0	Progesterone	3.57	4	Alginic acid	SPME	25	7	Neale, P. A.; Escher, B. I.; Schäfer, A. I. pH dependence of steroid hormone—organic matter interactions at environmental concentrations. Science of The Total Environment 2009, 407 (3), 1164-1173. DOI: https://doi.org/10.1016/j.scitotenv.2008.09.035.
000057-83-0	Progesterone	5.53	4	Tannic acid	SPME	25	7	Neale, P. A.; Escher, B. I.; Schäfer, A. I. pH dependence of steroid hormone—organic matter interactions at environmental concentrations. Science of The Total Environment 2009, 407 (3), 1164-1173. DOI: https://doi.org/10.1016/j.scitotenv.2008.09.035.
000058-22-0	testosterone	3.18	2	Soil Porewater DOM	SPME	21	5.38	Haftka, J. J. H.; Scherpenisse, P.; Jonker, M. T. O.; Hermens, J. L. M. Using Polyacrylate-Coated SPME Fibers To Quantify Sorption of Polar and Ionic Organic Contaminants to Dissolved Organic Carbon. Environmental Science & Technology 2013, 47 (9), 4455-4462. DOI: 10.1021/es400236a.
000058-22-0	Testosterone	4.04	3	Aldrich HA	SPME	25	7	Neale, P. A.; Escher, B. I.; Schäfer, A. I. pH dependence of steroid hormone—organic matter interactions at environmental concentrations. Science of The Total Environment 2009, 407 (3), 1164-1173. DOI: https://doi.org/10.1016/j.scitotenv.2008.09.035.
000058-22-0	Testosterone	3.16	4	Alginic acid	SPME	25	7	Neale, P. A.; Escher, B. I.; Schäfer, A. I. pH dependence of steroid hormone—organic matter interactions at environmental concentrations. Science of The Total Environment 2009, 407 (3), 1164-1173. DOI: https://doi.org/10.1016/j.scitotenv.2008.09.035.
000058-22-0	Testosterone	4.74	4	Tannic acid	SPME	25	7	Neale, P. A.; Escher, B. I.; Schäfer, A. I. pH dependence of steroid hormone—organic matter interactions at environmental concentrations. Science of The Total Environment 2009, 407 (3), 1164-1173. DOI: https://doi.org/10.1016/j.scitotenv.2008.09.035.
000058-89-9	δ-HCH	4.06	3	Fluka HA	TECAM	20	7.5	Ke, R.; Wang, Z.; Huang, S.; Khan, S. U. Accurate quantification of freely dissolved organochlorine pesticides in water in the presence of dissolved organic matter using triolein-embedded cellulose acetate membrane. Analytical and Bioanalytical Chemistry 2007, 387 (8), 2871-2879. DOI: 10.1007/s00216-007-1174-6.
000059-50-7	4-chloro-3-methylphenol	2.47	3	Aldrich HA	SPME		7.3	Ohlenbusch, G.; Frimmel, F. H. Investigations on the sorption of phenols to dissolved organic matter by a QSAR study. Chemosphere 2001, 45 (3), 323-327. DOI: https://doi.org/10.1016/S0045-6535(00)00588-9.
000060-57-1	Dieldrin	4.56	3	Roth HA	SPME	25	7	Georgi, A.; Kopinke, F. D. Validation of a modified Flory‐Huggins concept for description of hydrophobic organic compound sorption on dissolved humic substances. Environmental toxicology and chemistry 2002, 21 (9), 1766-1774. DOI: 10.1002/etc.5620210902 (acccessed 1/7/2025).
000060-57-1	Dieldrin	4.96	3	Fluka HA	TECAM	20	7.5	Ke, R.; Wang, Z.; Huang, S.; Khan, S. U. Accurate quantification of freely dissolved organochlorine pesticides in water in the presence of dissolved organic matter using triolein-embedded cellulose acetate membrane. Analytical and Bioanalytical Chemistry 2007, 387 (8), 2871-2879. DOI: 10.1007/s00216-007-1174-6.
000072-20-8	Endrin	4.57	3	Fluka HA	TECAM	20	7.5	Ke, R.; Wang, Z.; Huang, S.; Khan, S. U. Accurate quantification of freely dissolved organochlorine pesticides in water in the presence of dissolved organic matter using triolein-embedded cellulose acetate membrane. Analytical and Bioanalytical Chemistry 2007, 387 (8), 2871-2879. DOI: 10.1007/s00216-007-1174-6.
000072-54-8	1,1-dichloro-2,2-bis(4-chlorophenylethane)	5.82	3	Roth HA	SPME	25	7	Georgi, A.; Kopinke, F. D. Validation of a modified Flory‐Huggins concept for description of hydrophobic organic compound sorption on dissolved humic substances. Environmental toxicology and chemistry 2002, 21 (9), 1766-1774. DOI: 10.1002/etc.5620210902 (acccessed 1/7/2025).
000072-54-8	4,4′-DDD	5.19	3	Fluka HA	TECAM	20	7.5	Ke, R.; Wang, Z.; Huang, S.; Khan, S. U. Accurate quantification of freely dissolved organochlorine pesticides in water in the presence of dissolved organic matter using triolein-embedded cellulose acetate membrane. Analytical and Bioanalytical Chemistry 2007, 387 (8), 2871-2879. DOI: 10.1007/s00216-007-1174-6.
000072-55-9	1,1-dichloro-2,2-bis-(4-chlorophenyl)ethene	4.4	2	Soil HA	SPME		7	Prosen, H.; Fingler, S.; Zupančič-Kralj, L.; Drevenkar, V. Partitioning of selected environmental pollutants into organic matter as determined by solid-phase microextraction. Chemosphere 2007, 66 (8), 1580-1589. DOI: https://doi.org/10.1016/j.chemosphere.2006.08.006.
000072-55-9	1,1-dichloro-2,2-bis-(4-chlorophenyl)ethene	4.5	2	Soil HA	SPME		7	Prosen, H.; Fingler, S.; Zupančič-Kralj, L.; Drevenkar, V. Partitioning of selected environmental pollutants into organic matter as determined by solid-phase microextraction. Chemosphere 2007, 66 (8), 1580-1589. DOI: https://doi.org/10.1016/j.chemosphere.2006.08.006.
000072-55-9	1,1-dichloro-2,2-bis-(4-chlorophenyl)ethene	4.6	3	Aldrich HA	SPME		7	Prosen, H.; Fingler, S.; Zupančič-Kralj, L.; Drevenkar, V. Partitioning of selected environmental pollutants into organic matter as determined by solid-phase microextraction. Chemosphere 2007, 66 (8), 1580-1589. DOI: https://doi.org/10.1016/j.chemosphere.2006.08.006.
000072-55-9	4,4′-DDE	5.29	3	Fluka HA	TECAM	20	7.5	Ke, R.; Wang, Z.; Huang, S.; Khan, S. U. Accurate quantification of freely dissolved organochlorine pesticides in water in the presence of dissolved organic matter using triolein-embedded cellulose acetate membrane. Analytical and Bioanalytical Chemistry 2007, 387 (8), 2871-2879. DOI: 10.1007/s00216-007-1174-6.
000076-44-8	Heptachlor	4.85	3	Fluka HA	TECAM	20	7.5	Ke, R.; Wang, Z.; Huang, S.; Khan, S. U. Accurate quantification of freely dissolved organochlorine pesticides in water in the presence of dissolved organic matter using triolein-embedded cellulose acetate membrane. Analytical and Bioanalytical Chemistry 2007, 387 (8), 2871-2879. DOI: 10.1007/s00216-007-1174-6.
000078-31-9	Cresyl diphenyl phosphate	2.22	1	Surface Water HA	nd-SPME	room temperature	7	Pang, L.; Liu, J.; Yin, Y.; Shen, M. Evaluating the sorption of organophosphate esters to different sourced humic acids and its effects on the toxicity to Daphnia magna. Environmental toxicology and chemistry 2013, 32 (12), 2755-2761. DOI: 10.1002/etc.2360 (acccessed 1/7/2025).
000078-31-9	Cresyl diphenyl phosphate	3.88	2	Soil HA	nd-SPME	room temperature	7	Pang, L.; Liu, J.; Yin, Y.; Shen, M. Evaluating the sorption of organophosphate esters to different sourced humic acids and its effects on the toxicity to Daphnia magna. Environmental toxicology and chemistry 2013, 32 (12), 2755-2761. DOI: 10.1002/etc.2360 (acccessed 1/7/2025).
000078-31-9	Cresyl diphenyl phosphate	4.63	3	Aldrich HA	nd-SPME	room temperature	7	Pang, L.; Liu, J.; Yin, Y.; Shen, M. Evaluating the sorption of organophosphate esters to different sourced humic acids and its effects on the toxicity to Daphnia magna. Environmental toxicology and chemistry 2013, 32 (12), 2755-2761. DOI: 10.1002/etc.2360 (acccessed 1/7/2025).
000078-31-9	Cresyl diphenyl phosphate	4.26	3	Acros HA	nd-SPME	room temperature	7	Pang, L.; Liu, J.; Yin, Y.; Shen, M. Evaluating the sorption of organophosphate esters to different sourced humic acids and its effects on the toxicity to Daphnia magna. Environmental toxicology and chemistry 2013, 32 (12), 2755-2761. DOI: 10.1002/etc.2360 (acccessed 1/7/2025).
000082-05-3	7H-Benz(de)anthracen-7-one	5.18	2	Soil Porewater DOM	Static Leaching (ER-H) and Passive Sampling (POM)	room temperature	4.7~8.63	Enell, A.; Lundstedt, S.; Arp, H. P. H.; Josefsson, S.; Cornelissen, G.; Wik, O.; Berggren Kleja, D. Combining Leaching and Passive Sampling To Measure the Mobility and Distribution between Porewater, DOC, and Colloids of Native Oxy-PAHs, N-PACs, and PAHs in Historically Contaminated Soil. Environmental Science & Technology 2016, 50 (21), 11797-11805. DOI: 10.1021/acs.est.6b02774.
000083-32-9	Acenaphthene	4.25	2	Soil Porewater DOM	Static Leaching (ER-H) and Passive Sampling (POM)	room temperature	4.7~8.63	Enell, A.; Lundstedt, S.; Arp, H. P. H.; Josefsson, S.; Cornelissen, G.; Wik, O.; Berggren Kleja, D. Combining Leaching and Passive Sampling To Measure the Mobility and Distribution between Porewater, DOC, and Colloids of Native Oxy-PAHs, N-PACs, and PAHs in Historically Contaminated Soil. Environmental Science & Technology 2016, 50 (21), 11797-11805. DOI: 10.1021/acs.est.6b02774.
000083-32-9	Acenaphthene	3.67	3	Roth HA	SPME	25	7	Georgi, A.; Kopinke, F. D. Validation of a modified Flory‐Huggins concept for description of hydrophobic organic compound sorption on dissolved humic substances. Environmental toxicology and chemistry 2002, 21 (9), 1766-1774. DOI: 10.1002/etc.5620210902 (acccessed 1/7/2025).
000083-32-9	Acenaphthene	3.185	3	Aldrich HA	nd-SPME	22	7	Smith, K. E. C.; Thullner, M.; Wick, L. Y.; Harms, H. Dissolved Organic Carbon Enhances the Mass Transfer of Hydrophobic Organic Compounds from Nonaqueous Phase Liquids (NAPLs) into the Aqueous Phase. Environmental Science & Technology 2011, 45 (20), 8741-8747. DOI: 10.1021/es202983k.
000084-74-2	dibutylphthalate	4.8	1	Surface Water HA	FQ	22	7	Yamamoto, H.; Liljestrand, H. M.; Shimizu, Y.; Morita, M. Effects of Physical−Chemical Characteristics on the Sorption of Selected Endocrine Disruptors by Dissolved Organic Matter Surrogates. Environmental Science & Technology 2003, 37 (12), 2646-2657. DOI: 10.1021/es026405w.
000084-74-2	dibutylphthalate	4.65	1	Surface Water FA	FQ	22	7	Yamamoto, H.; Liljestrand, H. M.; Shimizu, Y.; Morita, M. Effects of Physical−Chemical Characteristics on the Sorption of Selected Endocrine Disruptors by Dissolved Organic Matter Surrogates. Environmental Science & Technology 2003, 37 (12), 2646-2657. DOI: 10.1021/es026405w.
000084-74-2	dibutylphthalate	4.75	1	Surface Water FA	FQ	22	7	Yamamoto, H.; Liljestrand, H. M.; Shimizu, Y.; Morita, M. Effects of Physical−Chemical Characteristics on the Sorption of Selected Endocrine Disruptors by Dissolved Organic Matter Surrogates. Environmental Science & Technology 2003, 37 (12), 2646-2657. DOI: 10.1021/es026405w.
000084-74-2	dibutylphthalate	4.95	3	Aldrich HA	FQ	22	7	Yamamoto, H.; Liljestrand, H. M.; Shimizu, Y.; Morita, M. Effects of Physical−Chemical Characteristics on the Sorption of Selected Endocrine Disruptors by Dissolved Organic Matter Surrogates. Environmental Science & Technology 2003, 37 (12), 2646-2657. DOI: 10.1021/es026405w.
000084-74-2	dibutylphthalate	4.84	4	Tannic Acid	FQ	22	7	Yamamoto, H.; Liljestrand, H. M.; Shimizu, Y.; Morita, M. Effects of Physical−Chemical Characteristics on the Sorption of Selected Endocrine Disruptors by Dissolved Organic Matter Surrogates. Environmental Science & Technology 2003, 37 (12), 2646-2657. DOI: 10.1021/es026405w.
000085-01-8	phenanthrene	4.74	1	Sediment Porewater DOM	Passive sampling	20	7	Haftka, J. J. H.; Govers, H. A. J.; Parsons, J. R. Influence of temperature and origin of dissolved organic matter on the partitioning behavior of polycyclic aromatic hydrocarbons. Environmental Science and Pollution Research 2010, 17 (5), 1070-1079. DOI: 10.1007/s11356-009-0263-9.
000085-01-8	phenanthrene	4.29	1	Sediment Porewater DOM	Passive sampling	3.2	7	Haftka, J. J. H.; Govers, H. A. J.; Parsons, J. R. Influence of temperature and origin of dissolved organic matter on the partitioning behavior of polycyclic aromatic hydrocarbons. Environmental Science and Pollution Research 2010, 17 (5), 1070-1079. DOI: 10.1007/s11356-009-0263-9.
000085-01-8	phenanthrene	4.17	1	Sediment Porewater DOM	Passive sampling	20.1	7	Haftka, J. J. H.; Govers, H. A. J.; Parsons, J. R. Influence of temperature and origin of dissolved organic matter on the partitioning behavior of polycyclic aromatic hydrocarbons. Environmental Science and Pollution Research 2010, 17 (5), 1070-1079. DOI: 10.1007/s11356-009-0263-9.
000085-01-8	phenanthrene	4.43	1	Surface Water HA	FQ		6	Mei, Y.; Wu, F.; Wang, L.; Bai, Y.; Li, W.; Liao, H. Binding characteristics of perylene, phenanthrene and anthracene to different DOM fractions from lake water. Journal of Environmental Sciences 2009, 21 (4), 414-423. DOI: https://doi.org/10.1016/S1001-0742(08)62285-8.
000085-01-8	phenanthrene	4.16	1	Surface Water FA	FQ		6	Mei, Y.; Wu, F.; Wang, L.; Bai, Y.; Li, W.; Liao, H. Binding characteristics of perylene, phenanthrene and anthracene to different DOM fractions from lake water. Journal of Environmental Sciences 2009, 21 (4), 414-423. DOI: https://doi.org/10.1016/S1001-0742(08)62285-8.
000085-01-8	phenanthrene	4.53	1	Surface Water HON	FQ		6	Mei, Y.; Wu, F.; Wang, L.; Bai, Y.; Li, W.; Liao, H. Binding characteristics of perylene, phenanthrene and anthracene to different DOM fractions from lake water. Journal of Environmental Sciences 2009, 21 (4), 414-423. DOI: https://doi.org/10.1016/S1001-0742(08)62285-8.
000085-01-8	phenanthrene	4.25	1	Surface Water HIA	FQ		6	Mei, Y.; Wu, F.; Wang, L.; Bai, Y.; Li, W.; Liao, H. Binding characteristics of perylene, phenanthrene and anthracene to different DOM fractions from lake water. Journal of Environmental Sciences 2009, 21 (4), 414-423. DOI: https://doi.org/10.1016/S1001-0742(08)62285-8.
000085-01-8	phenanthrene	4.31	1	Surface Water HIB	FQ		6	Mei, Y.; Wu, F.; Wang, L.; Bai, Y.; Li, W.; Liao, H. Binding characteristics of perylene, phenanthrene and anthracene to different DOM fractions from lake water. Journal of Environmental Sciences 2009, 21 (4), 414-423. DOI: https://doi.org/10.1016/S1001-0742(08)62285-8.
000085-01-8	Phenanthrene	4.59	2	Soil Porewater DOM	Static Leaching (ER-H) and Passive Sampling (POM)	room temperature	4.7~8.63	Enell, A.; Lundstedt, S.; Arp, H. P. H.; Josefsson, S.; Cornelissen, G.; Wik, O.; Berggren Kleja, D. Combining Leaching and Passive Sampling To Measure the Mobility and Distribution between Porewater, DOC, and Colloids of Native Oxy-PAHs, N-PACs, and PAHs in Historically Contaminated Soil. Environmental Science & Technology 2016, 50 (21), 11797-11805. DOI: 10.1021/acs.est.6b02774.
000085-01-8	phenanthrene	4.89	2	Peat HA	FQ		6	Mei, Y.; Wu, F.; Wang, L.; Bai, Y.; Li, W.; Liao, H. Binding characteristics of perylene, phenanthrene and anthracene to different DOM fractions from lake water. Journal of Environmental Sciences 2009, 21 (4), 414-423. DOI: https://doi.org/10.1016/S1001-0742(08)62285-8.
000085-01-8	phenanthrene	4.699	2	Soil HA	FQ		8	Gauthier, T. D.; Shane, E. C.; Guerin, W. F.; Seitz, W. R.; Grant, C. L. Fluorescence quenching method for determining equilibrium constants for polycyclic aromatic hydrocarbons binding to dissolved humic materials. Environmental Science & Technology 1986, 20 (11), 1162-1166. DOI: 10.1021/es00153a012.
000085-01-8	phenanthrene	4.51	2	Soil Porewater DOM	FQ		4.6~5.4	Raber, B.; Kögel-Knabner, I.; Stein, C.; Klem, D. Partitioning of polycyclic aromatic hydrocarbons to dissolved organic matter from different soils. Chemosphere 1998, 36 (1), 79-97. DOI: https://doi.org/10.1016/S0045-6535(97)00352-4.
000085-01-8	phenanthrene	4.51	2	Soil Porewater DOM	FQ		4.6~5.4	Raber, B.; Kögel-Knabner, I.; Stein, C.; Klem, D. Partitioning of polycyclic aromatic hydrocarbons to dissolved organic matter from different soils. Chemosphere 1998, 36 (1), 79-97. DOI: https://doi.org/10.1016/S0045-6535(97)00352-4.
000085-01-8	phenanthrene	3.93	3	Roth HA	SPME		6	Poerschmann, J.; Kopinke, F.-D. Sorption of Very Hydrophobic Organic Compounds (VHOCs) on Dissolved Humic Organic Matter (DOM). 2. Measurement of Sorption and Application of a Flory−Huggins Concept To Interpret the Data †. Environmental science & technology 2001, 35, 1142-1148. DOI: 10.1021/es0017615.
000085-01-8	phenanthrene	4.78	3	Aldrich HA	Solid Phase Dosing and Sampling	21	7.03~7.82	ter Laak, T. L.; Durjava, M.; Struijs, J.; Hermens, J. L. M. Solid Phase Dosing and Sampling Technique To Determine Partition Coefficients of Hydrophobic Chemicals in Complex Matrixes. Environmental Science & Technology 2005, 39 (10), 3736-3742. DOI: 10.1021/es048406p.
000085-01-8	phenanthrene	4.61	3	Aldrich HA	Passive dosing	25	5.5~7	Kim, S.-J.; Kwon, J.-H. Determination of Partition Coefficients for Selected PAHs between Water and Dissolved Organic Matter. CLEAN – Soil, Air, Water 2010, 38, 797-802. DOI: 10.1002/clen.201000113.
000085-01-8	Phenanthrene	4.29	3	Roth HA	SPME	25	7	Georgi, A.; Kopinke, F. D. Validation of a modified Flory‐Huggins concept for description of hydrophobic organic compound sorption on dissolved humic substances. Environmental toxicology and chemistry 2002, 21 (9), 1766-1774. DOI: 10.1002/etc.5620210902 (acccessed 1/7/2025).
000085-01-8	Phenanthrene	4.193	3	Aldrich HA	nd-SPME	22	7	Smith, K. E. C.; Thullner, M.; Wick, L. Y.; Harms, H. Dissolved Organic Carbon Enhances the Mass Transfer of Hydrophobic Organic Compounds from Nonaqueous Phase Liquids (NAPLs) into the Aqueous Phase. Environmental Science & Technology 2011, 45 (20), 8741-8747. DOI: 10.1021/es202983k.
000085-01-8	phenanthrene	4.48	3	Aldrich HA	nd-SPME	room temperature		Hu, X.; Liu, J.; Mayer, P.; Jiang, G. Impacts of some environmentally relevant parameters on the sorption of polycyclic aromatic hydrocarbons to aqueous suspensions of fullerene. Environmental toxicology and chemistry 2008, 27 (9), 1868-1874. DOI: 10.1897/08-009.1 (acccessed 1/7/2025).
000085-01-8	phenanthrene	4.73	3	Roth HA	FQ			Kopinke, F. D.; Georgi, A.; Mackenzie, K. Sorption and Chemical Reactions of PAHs with Dissolved Humic Substances and Related Model Polymers. Acta hydrochimica et hydrobiologica 2001, 28, 385-399. DOI: 10.1002/1521-401X(20017)28:7<385::AID-AHEH385>3.0.CO;2-A.
000085-01-8	phenanthrene	4.613	3	Aldrich HA	FQ	23	6	Laor, Y.; Rebhun, M. Evidence for Nonlinear Binding of PAHs to Dissolved Humic Acids. Environmental Science & Technology 2002, 36 (5), 955-961. DOI: 10.1021/es001996g.
000085-01-8	phenanthrene	4.55	4	Sodium dodecyl sulfate micelle	Passive dosing	25	5.5~7	Kim, S.-J.; Kwon, J.-H. Determination of Partition Coefficients for Selected PAHs between Water and Dissolved Organic Matter. CLEAN – Soil, Air, Water 2010, 38, 797-802. DOI: 10.1002/clen.201000113.
000086-73-7	fluorene	3.58	3	Roth HA	SPME		6	Poerschmann, J.; Kopinke, F.-D. Sorption of Very Hydrophobic Organic Compounds (VHOCs) on Dissolved Humic Organic Matter (DOM). 2. Measurement of Sorption and Application of a Flory−Huggins Concept To Interpret the Data †. Environmental science & technology 2001, 35, 1142-1148. DOI: 10.1021/es0017615.
000086-73-7	Fluorene	3.86	3	Roth HA	SPME	25	7	Georgi, A.; Kopinke, F. D. Validation of a modified Flory‐Huggins concept for description of hydrophobic organic compound sorption on dissolved humic substances. Environmental toxicology and chemistry 2002, 21 (9), 1766-1774. DOI: 10.1002/etc.5620210902 (acccessed 1/7/2025).
000086-73-7	Fluorene	3.662	3	Aldrich HA	nd-SPME	22	7	Smith, K. E. C.; Thullner, M.; Wick, L. Y.; Harms, H. Dissolved Organic Carbon Enhances the Mass Transfer of Hydrophobic Organic Compounds from Nonaqueous Phase Liquids (NAPLs) into the Aqueous Phase. Environmental Science & Technology 2011, 45 (20), 8741-8747. DOI: 10.1021/es202983k.
000086-74-8	carbazole	2.19	1	Surface Water FA	SPME	25	7.8	Neale, P. A.; Escher, B. I.; Goss, K.-U.; Endo, S. Evaluating dissolved organic carbon–water partitioning using polyparameter linear free energy relationships: Implications for the fate of disinfection by-products. Water Research 2012, 46 (11), 3637-3645. DOI: https://doi.org/10.1016/j.watres.2012.04.005.
000086-74-8	Carbazole	4.23	2	Soil Porewater DOM	Static Leaching (ER-H) and Passive Sampling (POM)	room temperature	4.7~8.63	Enell, A.; Lundstedt, S.; Arp, H. P. H.; Josefsson, S.; Cornelissen, G.; Wik, O.; Berggren Kleja, D. Combining Leaching and Passive Sampling To Measure the Mobility and Distribution between Porewater, DOC, and Colloids of Native Oxy-PAHs, N-PACs, and PAHs in Historically Contaminated Soil. Environmental Science & Technology 2016, 50 (21), 11797-11805. DOI: 10.1021/acs.est.6b02774.
000088-04-0	4-chloro-3,5-dimethylphenol	2.83	3	Aldrich HA	SPME		7.3	Ohlenbusch, G.; Frimmel, F. H. Investigations on the sorption of phenols to dissolved organic matter by a QSAR study. Chemosphere 2001, 45 (3), 323-327. DOI: https://doi.org/10.1016/S0045-6535(00)00588-9.
000090-12-0	1-methylnaphthalene	3.334	3	Aldrich HA	SPME	23	7.3~8.4	Van Stempvoort, D. R.; Lesage, S. Binding of methylated naphthalenes to concentrated aqueous humic acid. Advances in Environmental Research 2002, 6 (4), 495-504. DOI: https://doi.org/10.1016/S1093-0191(01)00076-4.
000090-12-0	1-methylnaphthalene	2.926	3	Aldrich HA	SPME	23	7.3~8.4	Van Stempvoort, D. R.; Lesage, S. Binding of methylated naphthalenes to concentrated aqueous humic acid. Advances in Environmental Research 2002, 6 (4), 495-504. DOI: https://doi.org/10.1016/S1093-0191(01)00076-4.
000090-12-0	1-methylnaphthalene	2.867	3	Aldrich HA	SPME	23	7.3~8.4	Van Stempvoort, D. R.; Lesage, S. Binding of methylated naphthalenes to concentrated aqueous humic acid. Advances in Environmental Research 2002, 6 (4), 495-504. DOI: https://doi.org/10.1016/S1093-0191(01)00076-4.
000090-12-0	1-methylnaphthalene	3.064	3	Aldrich HA	SPME	23	7.3~8.4	Van Stempvoort, D. R.; Lesage, S. Binding of methylated naphthalenes to concentrated aqueous humic acid. Advances in Environmental Research 2002, 6 (4), 495-504. DOI: https://doi.org/10.1016/S1093-0191(01)00076-4.
000090-12-0	1-methylnaphthalene	3.1	3	Aldrich HA	SPME	23	7.3~8.4	Van Stempvoort, D. R.; Lesage, S. Binding of methylated naphthalenes to concentrated aqueous humic acid. Advances in Environmental Research 2002, 6 (4), 495-504. DOI: https://doi.org/10.1016/S1093-0191(01)00076-4.
000090-15-3	1-Naphthol	4.301	2	Soil HA	FQ		7	Chen, S.; Inskeep, W. P.; Williams, S.; Callis, P. R. Fluorescence lifetime measurements of fluoranthene, 1-naphthol, and napropamide in the presence of dissolved humic Acid. Environmental science & technology 1994, 28 9, 1582-1588.
000091-20-3	naphthalene	2.93	3	Roth HA	SPME		6	Poerschmann, J.; Kopinke, F.-D. Sorption of Very Hydrophobic Organic Compounds (VHOCs) on Dissolved Humic Organic Matter (DOM). 2. Measurement of Sorption and Application of a Flory−Huggins Concept To Interpret the Data †. Environmental science & technology 2001, 35, 1142-1148. DOI: 10.1021/es0017615.
000091-20-3	Naphthalene	3.29	3	Roth HA	SPME	25	7	Georgi, A.; Kopinke, F. D. Validation of a modified Flory‐Huggins concept for description of hydrophobic organic compound sorption on dissolved humic substances. Environmental toxicology and chemistry 2002, 21 (9), 1766-1774. DOI: 10.1002/etc.5620210902 (acccessed 1/7/2025).
000091-57-6	2-methylnaphthalene	3.228	3	Aldrich HA	SPME	23	7.3~8.4	Van Stempvoort, D. R.; Lesage, S. Binding of methylated naphthalenes to concentrated aqueous humic acid. Advances in Environmental Research 2002, 6 (4), 495-504. DOI: https://doi.org/10.1016/S1093-0191(01)00076-4.
000091-57-6	2-Methylnaphthalene	3.52	3	Roth HA	SPME	25	7	Georgi, A.; Kopinke, F. D. Validation of a modified Flory‐Huggins concept for description of hydrophobic organic compound sorption on dissolved humic substances. Environmental toxicology and chemistry 2002, 21 (9), 1766-1774. DOI: 10.1002/etc.5620210902 (acccessed 1/7/2025).
000092-52-4	Biphenyl	3.48	3	Roth HA	SPME	25	7	Georgi, A.; Kopinke, F. D. Validation of a modified Flory‐Huggins concept for description of hydrophobic organic compound sorption on dissolved humic substances. Environmental toxicology and chemistry 2002, 21 (9), 1766-1774. DOI: 10.1002/etc.5620210902 (acccessed 1/7/2025).
000101-20-2	triclocarban	5.14	1	Sediment Porewater DOM	TFME	25	7	Ahmadi, F.; Sparham, C.; Pawliszyn, J. A flow-through aqueous standard generation system for thin film microextraction investigations of UV filters and biocides partitioning to different environmental compartments. Environmental Pollution 2017, 230, 663-673. DOI: https://doi.org/10.1016/j.envpol.2017.06.092.
000101-20-2	triclocarban	5.56	3	Aldrich HA	TFME	25	7	Ahmadi, F.; Sparham, C.; Pawliszyn, J. A flow-through aqueous standard generation system for thin film microextraction investigations of UV filters and biocides partitioning to different environmental compartments. Environmental Pollution 2017, 230, 663-673. DOI: https://doi.org/10.1016/j.envpol.2017.06.092.
000101-81-5	Diphenylmethane	3.56	3	Roth HA	SPME	25	7	Georgi, A.; Kopinke, F. D. Validation of a modified Flory‐Huggins concept for description of hydrophobic organic compound sorption on dissolved humic substances. Environmental toxicology and chemistry 2002, 21 (9), 1766-1774. DOI: 10.1002/etc.5620210902 (acccessed 1/7/2025).
000103-30-0	Trans-stilbene	4.29	3	Roth HA	SPME	25	7	Georgi, A.; Kopinke, F. D. Validation of a modified Flory‐Huggins concept for description of hydrophobic organic compound sorption on dissolved humic substances. Environmental toxicology and chemistry 2002, 21 (9), 1766-1774. DOI: 10.1002/etc.5620210902 (acccessed 1/7/2025).
000104-40-5	p-nonylphenol	4.96	1	Surface Water HA	FQ	22	7	Yamamoto, H.; Liljestrand, H. M.; Shimizu, Y.; Morita, M. Effects of Physical−Chemical Characteristics on the Sorption of Selected Endocrine Disruptors by Dissolved Organic Matter Surrogates. Environmental Science & Technology 2003, 37 (12), 2646-2657. DOI: 10.1021/es026405w.
000104-40-5	p-nonylphenol	4.7	1	Surface Water FA	FQ	22	7	Yamamoto, H.; Liljestrand, H. M.; Shimizu, Y.; Morita, M. Effects of Physical−Chemical Characteristics on the Sorption of Selected Endocrine Disruptors by Dissolved Organic Matter Surrogates. Environmental Science & Technology 2003, 37 (12), 2646-2657. DOI: 10.1021/es026405w.
000104-40-5	p-nonylphenol	4.71	1	Surface Water FA	FQ	22	7	Yamamoto, H.; Liljestrand, H. M.; Shimizu, Y.; Morita, M. Effects of Physical−Chemical Characteristics on the Sorption of Selected Endocrine Disruptors by Dissolved Organic Matter Surrogates. Environmental Science & Technology 2003, 37 (12), 2646-2657. DOI: 10.1021/es026405w.
000104-40-5	Nonylphenol	5.25	3	Aldrich HA	Passive dosing	25	7.8	Neale, P. A.; Antony, A.; Gernjak, W.; Leslie, G.; Escher, B. I. Natural versus wastewater derived dissolved organic carbon: Implications for the environmental fate of organic micropollutants. Water Research 2011, 45 (14), 4227-4237. DOI: https://doi.org/10.1016/j.watres.2011.05.038.
000104-40-5	p-nonylphenol	4.83	3	Aldrich HA	FQ	22	7	Yamamoto, H.; Liljestrand, H. M.; Shimizu, Y.; Morita, M. Effects of Physical−Chemical Characteristics on the Sorption of Selected Endocrine Disruptors by Dissolved Organic Matter Surrogates. Environmental Science & Technology 2003, 37 (12), 2646-2657. DOI: 10.1021/es026405w.
000104-40-5	p-nonylphenol	5.12	4	Tannic Acid	FQ	22	7	Yamamoto, H.; Liljestrand, H. M.; Shimizu, Y.; Morita, M. Effects of Physical−Chemical Characteristics on the Sorption of Selected Endocrine Disruptors by Dissolved Organic Matter Surrogates. Environmental Science & Technology 2003, 37 (12), 2646-2657. DOI: 10.1021/es026405w.
000105-67-9	2,4-dimethylphenol	2.24	3	Aldrich HA	SPME		7.3	Ohlenbusch, G.; Frimmel, F. H. Investigations on the sorption of phenols to dissolved organic matter by a QSAR study. Chemosphere 2001, 45 (3), 323-327. DOI: https://doi.org/10.1016/S0045-6535(00)00588-9.
000106-44-5	4-methylphenol	2.11	3	Aldrich HA	SPME		7.3	Ohlenbusch, G.; Frimmel, F. H. Investigations on the sorption of phenols to dissolved organic matter by a QSAR study. Chemosphere 2001, 45 (3), 323-327. DOI: https://doi.org/10.1016/S0045-6535(00)00588-9.
000106-48-9	4-chlorophenol	2.31	3	Aldrich HA	SPME		7.3	Ohlenbusch, G.; Frimmel, F. H. Investigations on the sorption of phenols to dissolved organic matter by a QSAR study. Chemosphere 2001, 45 (3), 323-327. DOI: https://doi.org/10.1016/S0045-6535(00)00588-9.
000111-65-9	n-octane	3.62	3	Roth HA	SPME		6	Poerschmann, J.; Kopinke, F.-D. Sorption of Very Hydrophobic Organic Compounds (VHOCs) on Dissolved Humic Organic Matter (DOM). 2. Measurement of Sorption and Application of a Flory−Huggins Concept To Interpret the Data †. Environmental science & technology 2001, 35, 1142-1148. DOI: 10.1021/es0017615.
000111-65-9	n-octane	4.34	3	Roth HA	SPME	25	7	Georgi, A.; Kopinke, F. D. Validation of a modified Flory‐Huggins concept for description of hydrophobic organic compound sorption on dissolved humic substances. Environmental toxicology and chemistry 2002, 21 (9), 1766-1774. DOI: 10.1002/etc.5620210902 (acccessed 1/7/2025).
000111-84-2	n-nonane	4.24	3	Roth HA	SPME		6	Poerschmann, J.; Kopinke, F.-D. Sorption of Very Hydrophobic Organic Compounds (VHOCs) on Dissolved Humic Organic Matter (DOM). 2. Measurement of Sorption and Application of a Flory−Huggins Concept To Interpret the Data †. Environmental science & technology 2001, 35, 1142-1148. DOI: 10.1021/es0017615.
000111-84-2	n-nonane	4.85	3	Roth HA	SPME	25	7	Georgi, A.; Kopinke, F. D. Validation of a modified Flory‐Huggins concept for description of hydrophobic organic compound sorption on dissolved humic substances. Environmental toxicology and chemistry 2002, 21 (9), 1766-1774. DOI: 10.1002/etc.5620210902 (acccessed 1/7/2025).
000112-40-3	n-dodecane	5.48	3	Roth HA	SPME		6	Poerschmann, J.; Kopinke, F.-D. Sorption of Very Hydrophobic Organic Compounds (VHOCs) on Dissolved Humic Organic Matter (DOM). 2. Measurement of Sorption and Application of a Flory−Huggins Concept To Interpret the Data †. Environmental science & technology 2001, 35, 1142-1148. DOI: 10.1021/es0017615.
000118-74-1	hexachlorobenzene	4.97	3	Aldrich HA	nd-SPME		7	Urrestarazu Ramos, E.; Meijer, S. N.; Vaes, W. H. J.; Verhaar, H. J. M.; Hermens, J. L. M. Using Solid-Phase Microextraction To Determine Partition Coefficients to Humic Acids and Bioavailable Concentrations of Hydrophobic Chemicals. Environmental Science & Technology 1998, 32 (21), 3430-3435. DOI: 10.1021/es980274a.
000118-74-1	hexachlorobenzene	5.14	3	Aldrich HA	passive sampling	25	7	Freidig, A. P.; Garicano, E. A.; Busser, F. J. M.; Hermens, J. L. M. Estimating impact of humic acid on bioavailability and bioaccumulation of hydrophobic chemicals in guppies using kinetic solid‐phase extraction. Environmental toxicology and chemistry 1998, 17.
000120-12-7	anthracene	4.5	1	Sediment Porewater DOM	Passive sampling	3.2	7	Haftka, J. J. H.; Scherpenisse, P.; Jonker, M. T. O.; Hermens, J. L. M. Using Polyacrylate-Coated SPME Fibers To Quantify Sorption of Polar and Ionic Organic Contaminants to Dissolved Organic Carbon. Environmental Science & Technology 2013, 47 (9), 4455-4462. DOI: 10.1021/es400236a.
000120-12-7	anthracene	4.36	1	Sediment Porewater DOM	Passive sampling	20.1	7	Haftka, J. J. H.; Scherpenisse, P.; Jonker, M. T. O.; Hermens, J. L. M. Using Polyacrylate-Coated SPME Fibers To Quantify Sorption of Polar and Ionic Organic Contaminants to Dissolved Organic Carbon. Environmental Science & Technology 2013, 47 (9), 4455-4462. DOI: 10.1021/es400236a.
000120-12-7	anthracene	4.05	1	Surface Water HA	FQ		6	Mei, Y.; Wu, F.; Wang, L.; Bai, Y.; Li, W.; Liao, H. Binding characteristics of perylene, phenanthrene and anthracene to different DOM fractions from lake water. Journal of Environmental Sciences 2009, 21 (4), 414-423. DOI: https://doi.org/10.1016/S1001-0742(08)62285-8.
000120-12-7	anthracene	4.22	1	Surface Water HON	FQ		6	Mei, Y.; Wu, F.; Wang, L.; Bai, Y.; Li, W.; Liao, H. Binding characteristics of perylene, phenanthrene and anthracene to different DOM fractions from lake water. Journal of Environmental Sciences 2009, 21 (4), 414-423. DOI: https://doi.org/10.1016/S1001-0742(08)62285-8.
000120-12-7	anthracene	4.01	1	Surface Water HIB	FQ		6	Mei, Y.; Wu, F.; Wang, L.; Bai, Y.; Li, W.; Liao, H. Binding characteristics of perylene, phenanthrene and anthracene to different DOM fractions from lake water. Journal of Environmental Sciences 2009, 21 (4), 414-423. DOI: https://doi.org/10.1016/S1001-0742(08)62285-8.
000120-12-7	anthracene	4.422	1	Surface Water HA	FQ			Schlautman, M. A.; Morgan, J. J. Effects of aqueous chemistry on the binding of polycyclic aromatic hydrocarbons by dissolved humic materials. Environmental Science & Technology 1993, 27 (5), 961-969. DOI: 10.1021/es00042a020.
000120-12-7	anthracene	4.179	1	Surface Water FA	FQ			Schlautman, M. A.; Morgan, J. J. Effects of aqueous chemistry on the binding of polycyclic aromatic hydrocarbons by dissolved humic materials. Environmental Science & Technology 1993, 27 (5), 961-969. DOI: 10.1021/es00042a020.
000120-12-7	Anthracene	4.83	2	Soil Porewater DOM	Static Leaching (ER-H) and Passive Sampling (POM)	room temperature	4.7~8.63	Enell, A.; Lundstedt, S.; Arp, H. P. H.; Josefsson, S.; Cornelissen, G.; Wik, O.; Berggren Kleja, D. Combining Leaching and Passive Sampling To Measure the Mobility and Distribution between Porewater, DOC, and Colloids of Native Oxy-PAHs, N-PACs, and PAHs in Historically Contaminated Soil. Environmental Science & Technology 2016, 50 (21), 11797-11805. DOI: 10.1021/acs.est.6b02774.
000120-12-7	anthracene	4.22	2	Leonardite HA	CF-MA-HS-SPME			Hsieh, P.-C.; Lee, C.-L.; Jen, J.-F.; Chang, K.-C. Complexation-flocculation combined with microwave-assisted headspace solid-phase microextraction in determining the binding constants of hydrophobic organic pollutants to dissolved humic substances. Analyst 2014, 140. DOI: 10.1039/C4AN01923G.
000120-12-7	anthracene	4.88	2	Peat HA	FQ		6	Mei, Y.; Wu, F.; Wang, L.; Bai, Y.; Li, W.; Liao, H. Binding characteristics of perylene, phenanthrene and anthracene to different DOM fractions from lake water. Journal of Environmental Sciences 2009, 21 (4), 414-423. DOI: https://doi.org/10.1016/S1001-0742(08)62285-8.
000120-12-7	anthracene	4.929	2	Soil HA	FQ		8	Gauthier, T. D.; Shane, E. C.; Guerin, W. F.; Seitz, W. R.; Grant, C. L. Fluorescence quenching method for determining equilibrium constants for polycyclic aromatic hydrocarbons binding to dissolved humic materials. Environmental Science & Technology 1986, 20 (11), 1162-1166. DOI: 10.1021/es00153a012.
000120-12-7	anthracene	4.568	2	Soil HA	FQ		8	Gauthier, T. D.; Shane, E. C.; Guerin, W. F.; Seitz, W. R.; Grant, C. L. Fluorescence quenching method for determining equilibrium constants for polycyclic aromatic hydrocarbons binding to dissolved humic materials. Environmental Science & Technology 1986, 20 (11), 1162-1166. DOI: 10.1021/es00153a012.
000120-12-7	anthracene	4.079	2	Soil HA	FQ			Perminova, I. V.; Grechishcheva, N. Y.; Petrosyan, V. S. Relationships between Structure and Binding Affinity of Humic Substances for Polycyclic Aromatic Hydrocarbons: Relevance of Molecular Descriptors. Environmental Science & Technology 1999, 33 (21), 3781-3787. DOI: 10.1021/es990056x.
000120-12-7	anthracene	4.342	2	Soil HA	FQ			Perminova, I. V.; Grechishcheva, N. Y.; Petrosyan, V. S. Relationships between Structure and Binding Affinity of Humic Substances for Polycyclic Aromatic Hydrocarbons: Relevance of Molecular Descriptors. Environmental Science & Technology 1999, 33 (21), 3781-3787. DOI: 10.1021/es990056x.
000120-12-7	anthracene	4.204	2	Soil HA	FQ			Perminova, I. V.; Grechishcheva, N. Y.; Petrosyan, V. S. Relationships between Structure and Binding Affinity of Humic Substances for Polycyclic Aromatic Hydrocarbons: Relevance of Molecular Descriptors. Environmental Science & Technology 1999, 33 (21), 3781-3787. DOI: 10.1021/es990056x.
000120-12-7	anthracene	4.398	2	Soil HA	FQ			Perminova, I. V.; Grechishcheva, N. Y.; Petrosyan, V. S. Relationships between Structure and Binding Affinity of Humic Substances for Polycyclic Aromatic Hydrocarbons: Relevance of Molecular Descriptors. Environmental Science & Technology 1999, 33 (21), 3781-3787. DOI: 10.1021/es990056x.
000120-12-7	anthracene	4.778	2	Soil HA	FQ			Perminova, I. V.; Grechishcheva, N. Y.; Petrosyan, V. S. Relationships between Structure and Binding Affinity of Humic Substances for Polycyclic Aromatic Hydrocarbons: Relevance of Molecular Descriptors. Environmental Science & Technology 1999, 33 (21), 3781-3787. DOI: 10.1021/es990056x.
000120-12-7	anthracene	4.699	2	Soil HA	FQ			Perminova, I. V.; Grechishcheva, N. Y.; Petrosyan, V. S. Relationships between Structure and Binding Affinity of Humic Substances for Polycyclic Aromatic Hydrocarbons: Relevance of Molecular Descriptors. Environmental Science & Technology 1999, 33 (21), 3781-3787. DOI: 10.1021/es990056x.
000120-12-7	anthracene	4.699	2	Soil HA	FQ			Perminova, I. V.; Grechishcheva, N. Y.; Petrosyan, V. S. Relationships between Structure and Binding Affinity of Humic Substances for Polycyclic Aromatic Hydrocarbons: Relevance of Molecular Descriptors. Environmental Science & Technology 1999, 33 (21), 3781-3787. DOI: 10.1021/es990056x.
000120-12-7	anthracene	4.699	2	Soil HA	FQ			Perminova, I. V.; Grechishcheva, N. Y.; Petrosyan, V. S. Relationships between Structure and Binding Affinity of Humic Substances for Polycyclic Aromatic Hydrocarbons: Relevance of Molecular Descriptors. Environmental Science & Technology 1999, 33 (21), 3781-3787. DOI: 10.1021/es990056x.
000120-12-7	anthracene	4.699	2	Soil HA	FQ			Perminova, I. V.; Grechishcheva, N. Y.; Petrosyan, V. S. Relationships between Structure and Binding Affinity of Humic Substances for Polycyclic Aromatic Hydrocarbons: Relevance of Molecular Descriptors. Environmental Science & Technology 1999, 33 (21), 3781-3787. DOI: 10.1021/es990056x.
000120-12-7	anthracene	4.845	2	Soil HA	FQ			Perminova, I. V.; Grechishcheva, N. Y.; Petrosyan, V. S. Relationships between Structure and Binding Affinity of Humic Substances for Polycyclic Aromatic Hydrocarbons: Relevance of Molecular Descriptors. Environmental Science & Technology 1999, 33 (21), 3781-3787. DOI: 10.1021/es990056x.
000120-12-7	anthracene	5	2	Soil HA	FQ			Perminova, I. V.; Grechishcheva, N. Y.; Petrosyan, V. S. Relationships between Structure and Binding Affinity of Humic Substances for Polycyclic Aromatic Hydrocarbons: Relevance of Molecular Descriptors. Environmental Science & Technology 1999, 33 (21), 3781-3787. DOI: 10.1021/es990056x.
000120-12-7	anthracene	5	2	Soil HA	FQ			Perminova, I. V.; Grechishcheva, N. Y.; Petrosyan, V. S. Relationships between Structure and Binding Affinity of Humic Substances for Polycyclic Aromatic Hydrocarbons: Relevance of Molecular Descriptors. Environmental Science & Technology 1999, 33 (21), 3781-3787. DOI: 10.1021/es990056x.
000120-12-7	anthracene	4.699	2	Soil HA+FA	FQ			Perminova, I. V.; Grechishcheva, N. Y.; Petrosyan, V. S. Relationships between Structure and Binding Affinity of Humic Substances for Polycyclic Aromatic Hydrocarbons: Relevance of Molecular Descriptors. Environmental Science & Technology 1999, 33 (21), 3781-3787. DOI: 10.1021/es990056x.
000120-12-7	anthracene	4.204	2	Soil FA	FQ		8	Gauthier, T. D.; Shane, E. C.; Guerin, W. F.; Seitz, W. R.; Grant, C. L. Fluorescence quenching method for determining equilibrium constants for polycyclic aromatic hydrocarbons binding to dissolved humic materials. Environmental Science & Technology 1986, 20 (11), 1162-1166. DOI: 10.1021/es00153a012.
000120-12-7	anthracene	4.505	2	Soil FA	FQ		8	Gauthier, T. D.; Shane, E. C.; Guerin, W. F.; Seitz, W. R.; Grant, C. L. Fluorescence quenching method for determining equilibrium constants for polycyclic aromatic hydrocarbons binding to dissolved humic materials. Environmental Science & Technology 1986, 20 (11), 1162-1166. DOI: 10.1021/es00153a012.
000120-12-7	anthracene	4.806	2	Soil HA	FQ		8	Gauthier, T. D.; Shane, E. C.; Guerin, W. F.; Seitz, W. R.; Grant, C. L. Fluorescence quenching method for determining equilibrium constants for polycyclic aromatic hydrocarbons binding to dissolved humic materials. Environmental Science & Technology 1986, 20 (11), 1162-1166. DOI: 10.1021/es00153a012.
000120-12-7	anthracene	4.89	3	Aldrich HA	Passive dosing	25	5.5~7	Kim, S.-J.; Kwon, J.-H. Determination of Partition Coefficients for Selected PAHs between Water and Dissolved Organic Matter. CLEAN – Soil, Air, Water 2010, 38, 797-802. DOI: 10.1002/clen.201000113.
000120-12-7	Anthracene	4.42	3	Roth HA	SPME	25	7	Georgi, A.; Kopinke, F. D. Validation of a modified Flory‐Huggins concept for description of hydrophobic organic compound sorption on dissolved humic substances. Environmental toxicology and chemistry 2002, 21 (9), 1766-1774. DOI: 10.1002/etc.5620210902 (acccessed 1/7/2025).
000120-12-7	anthracene	4.716	3	Aldrich HA	FQ		8	Gauthier, T. D.; Shane, E. C.; Guerin, W. F.; Seitz, W. R.; Grant, C. L. Fluorescence quenching method for determining equilibrium constants for polycyclic aromatic hydrocarbons binding to dissolved humic materials. Environmental Science & Technology 1986, 20 (11), 1162-1166. DOI: 10.1021/es00153a012.
000120-12-7	anthracene	5	3	Aldrich HA	FQ			Perminova, I. V.; Grechishcheva, N. Y.; Petrosyan, V. S. Relationships between Structure and Binding Affinity of Humic Substances for Polycyclic Aromatic Hydrocarbons: Relevance of Molecular Descriptors. Environmental Science & Technology 1999, 33 (21), 3781-3787. DOI: 10.1021/es990056x.
000120-12-7	anthracene	4.87	4	Sodium dodecyl sulfate micelle	Passive dosing	25	5.5~7	Kim, S.-J.; Kwon, J.-H. Determination of Partition Coefficients for Selected PAHs between Water and Dissolved Organic Matter. CLEAN – Soil, Air, Water 2010, 38, 797-802. DOI: 10.1002/clen.201000113.
000120-12-7	anthracene	3.71	4	2-hydroxypropyl-b-cyclodextrin	Passive dosing	25	5.5~7	Kim, S.-J.; Kwon, J.-H. Determination of Partition Coefficients for Selected PAHs between Water and Dissolved Organic Matter. CLEAN – Soil, Air, Water 2010, 38, 797-802. DOI: 10.1002/clen.201000113.
000124-18-5	n-decane	4.57	3	Roth HA	SPME		6	Poerschmann, J.; Kopinke, F.-D. Sorption of Very Hydrophobic Organic Compounds (VHOCs) on Dissolved Humic Organic Matter (DOM). 2. Measurement of Sorption and Application of a Flory−Huggins Concept To Interpret the Data †. Environmental science & technology 2001, 35, 1142-1148. DOI: 10.1021/es0017615.
000124-18-5	n-decane	5.3	3	Roth HA	SPME	25	7	Georgi, A.; Kopinke, F. D. Validation of a modified Flory‐Huggins concept for description of hydrophobic organic compound sorption on dissolved humic substances. Environmental toxicology and chemistry 2002, 21 (9), 1766-1774. DOI: 10.1002/etc.5620210902 (acccessed 1/7/2025).
000129-00-0	pyrene	5.02	1	Deep Water HA	SPME		7	Mackenzie, K.; Georgi, A.; Kumke, M.; Kopinke, F.-D. Sorption of Pyrene to Dissolved Humic Substances and Related Model Polymers. 2. Solid-Phase Microextraction (SPME) and Fluorescence Quenching Technique (FQT) as Analytical Methods. Environmental Science & Technology 2002, 36 (20), 4403-4409. DOI: 10.1021/es010310x.
000129-00-0	pyrene	4.8	1	Sediment HA	SPME		7	Mackenzie, K.; Georgi, A.; Kumke, M.; Kopinke, F.-D. Sorption of Pyrene to Dissolved Humic Substances and Related Model Polymers. 2. Solid-Phase Microextraction (SPME) and Fluorescence Quenching Technique (FQT) as Analytical Methods. Environmental Science & Technology 2002, 36 (20), 4403-4409. DOI: 10.1021/es010310x.
000129-00-0	pyrene	4.41	1	Surface Water HA	SPME		7	Mackenzie, K.; Georgi, A.; Kumke, M.; Kopinke, F.-D. Sorption of Pyrene to Dissolved Humic Substances and Related Model Polymers. 2. Solid-Phase Microextraction (SPME) and Fluorescence Quenching Technique (FQT) as Analytical Methods. Environmental Science & Technology 2002, 36 (20), 4403-4409. DOI: 10.1021/es010310x.
000129-00-0	pyrene	4.35	1	Deep Water FA	SPME		7	Mackenzie, K.; Georgi, A.; Kumke, M.; Kopinke, F.-D. Sorption of Pyrene to Dissolved Humic Substances and Related Model Polymers. 2. Solid-Phase Microextraction (SPME) and Fluorescence Quenching Technique (FQT) as Analytical Methods. Environmental Science & Technology 2002, 36 (20), 4403-4409. DOI: 10.1021/es010310x.
000129-00-0	pyrene	4.23	1	Surface Water FA	SPME		7	Mackenzie, K.; Georgi, A.; Kumke, M.; Kopinke, F.-D. Sorption of Pyrene to Dissolved Humic Substances and Related Model Polymers. 2. Solid-Phase Microextraction (SPME) and Fluorescence Quenching Technique (FQT) as Analytical Methods. Environmental Science & Technology 2002, 36 (20), 4403-4409. DOI: 10.1021/es010310x.
000129-00-0	pyrene	4.21	1	Surface Water HA	SPME		7	Mackenzie, K.; Georgi, A.; Kumke, M.; Kopinke, F.-D. Sorption of Pyrene to Dissolved Humic Substances and Related Model Polymers. 2. Solid-Phase Microextraction (SPME) and Fluorescence Quenching Technique (FQT) as Analytical Methods. Environmental Science & Technology 2002, 36 (20), 4403-4409. DOI: 10.1021/es010310x.
000129-00-0	pyrene	4.01	1	Surface Water FA	SPME		7	Mackenzie, K.; Georgi, A.; Kumke, M.; Kopinke, F.-D. Sorption of Pyrene to Dissolved Humic Substances and Related Model Polymers. 2. Solid-Phase Microextraction (SPME) and Fluorescence Quenching Technique (FQT) as Analytical Methods. Environmental Science & Technology 2002, 36 (20), 4403-4409. DOI: 10.1021/es010310x.
000129-00-0	pyrene	5.53	1	Sediment Porewater DOM	Passive sampling	20	7	Haftka, J. J. H.; Govers, H. A. J.; Parsons, J. R. Influence of temperature and origin of dissolved organic matter on the partitioning behavior of polycyclic aromatic hydrocarbons. Environmental Science and Pollution Research 2010, 17 (5), 1070-1079. DOI: 10.1007/s11356-009-0263-9.
000129-00-0	pyrene	5.03	1	Sediment Porewater DOM	Passive sampling	3.2	7	Haftka, J. J. H.; Govers, H. A. J.; Parsons, J. R. Influence of temperature and origin of dissolved organic matter on the partitioning behavior of polycyclic aromatic hydrocarbons. Environmental Science and Pollution Research 2010, 17 (5), 1070-1079. DOI: 10.1007/s11356-009-0263-9.
000129-00-0	pyrene	4.76	1	Sediment Porewater DOM	Passive sampling	20.1	7	Haftka, J. J. H.; Govers, H. A. J.; Parsons, J. R. Influence of temperature and origin of dissolved organic matter on the partitioning behavior of polycyclic aromatic hydrocarbons. Environmental Science and Pollution Research 2010, 17 (5), 1070-1079. DOI: 10.1007/s11356-009-0263-9.
000129-00-0	pyrene	4.59	1	Sediment Porewater DOM	Passive sampling	36	7	Haftka, J. J. H.; Govers, H. A. J.; Parsons, J. R. Influence of temperature and origin of dissolved organic matter on the partitioning behavior of polycyclic aromatic hydrocarbons. Environmental Science and Pollution Research 2010, 17 (5), 1070-1079. DOI: 10.1007/s11356-009-0263-9.
000129-00-0	pyrene	4.79	1	Sediment Porewater DOM	SPME			Hawthorne, S. B.; Grabanski, C. B.; Miller, D. J.; Kreitinger, J. P. Solid-Phase Microextraction Measurement of Parent and Alkyl Polycyclic Aromatic Hydrocarbons in Milliliter Sediment Pore Water Samples and Determination of KDOC Values. Environmental Science & Technology 2005, 39 (8), 2795-2803. DOI: 10.1021/es0405171.
000129-00-0	pyrene	4.26	1	Sediment Porewater DOM	SPME			Hawthorne, S. B.; Grabanski, C. B.; Miller, D. J.; Kreitinger, J. P. Solid-Phase Microextraction Measurement of Parent and Alkyl Polycyclic Aromatic Hydrocarbons in Milliliter Sediment Pore Water Samples and Determination of KDOC Values. Environmental Science & Technology 2005, 39 (8), 2795-2803. DOI: 10.1021/es0405171.
000129-00-0	pyrene	5.041	1	Surface Water HA	SPME	room temperature		Delgado-Moreno, L.; Wu, L.; Gan, J. Application of isotope dilution method for measuring bioavailability of organic contaminants sorbed to dissolved organic matter (DOM). Aquatic Toxicology 2015, 165, 129-135. DOI: https://doi.org/10.1016/j.aquatox.2015.05.006.
000129-00-0	pyrene	4.903	1	Surface Water FA	SPME	room temperature		Delgado-Moreno, L.; Wu, L.; Gan, J. Application of isotope dilution method for measuring bioavailability of organic contaminants sorbed to dissolved organic matter (DOM). Aquatic Toxicology 2015, 165, 129-135. DOI: https://doi.org/10.1016/j.aquatox.2015.05.006.
000129-00-0	pyrene	4.9	1	Surface Water HA	FQ			Kopinke, F. D.; Georgi, A.; Mackenzie, K. Sorption and Chemical Reactions of PAHs with Dissolved Humic Substances and Related Model Polymers. Acta hydrochimica et hydrobiologica 2001, 28, 385-399. DOI: 10.1002/1521-401X(20017)28:7<385::AID-AHEH385>3.0.CO;2-A.
000129-00-0	pyrene	3.993	1	Surface Water macromolecular organic acids	FQ	20	7	Peuravuori, J. Partition coefficients of pyrene to lake aquatic humic matter determined by fluorescence quenching and solubility enhancement. Analytica Chimica Acta 2001, 429 (1), 65-73. DOI: https://doi.org/10.1016/S0003-2670(00)01258-7.
000129-00-0	pyrene	4.195	1	Surface Water HA	FQ	20	7	Peuravuori, J. Partition coefficients of pyrene to lake aquatic humic matter determined by fluorescence quenching and solubility enhancement. Analytica Chimica Acta 2001, 429 (1), 65-73. DOI: https://doi.org/10.1016/S0003-2670(00)01258-7.
000129-00-0	pyrene	4.412	1	Surface Water HA	FQ	20	7	Peuravuori, J. Partition coefficients of pyrene to lake aquatic humic matter determined by fluorescence quenching and solubility enhancement. Analytica Chimica Acta 2001, 429 (1), 65-73. DOI: https://doi.org/10.1016/S0003-2670(00)01258-7.
000129-00-0	pyrene	4.213	1	Surface Water HA	FQ	20	7	Peuravuori, J. Partition coefficients of pyrene to lake aquatic humic matter determined by fluorescence quenching and solubility enhancement. Analytica Chimica Acta 2001, 429 (1), 65-73. DOI: https://doi.org/10.1016/S0003-2670(00)01258-7.
000129-00-0	pyrene	4.025	1	Surface Water FA	FQ	20	7	Peuravuori, J. Partition coefficients of pyrene to lake aquatic humic matter determined by fluorescence quenching and solubility enhancement. Analytica Chimica Acta 2001, 429 (1), 65-73. DOI: https://doi.org/10.1016/S0003-2670(00)01258-7.
000129-00-0	pyrene	3.961	1	Surface Water FA	FQ	20	7	Peuravuori, J. Partition coefficients of pyrene to lake aquatic humic matter determined by fluorescence quenching and solubility enhancement. Analytica Chimica Acta 2001, 429 (1), 65-73. DOI: https://doi.org/10.1016/S0003-2670(00)01258-7.
000129-00-0	pyrene	4.128	1	Surface Water FA	FQ	20	7	Peuravuori, J. Partition coefficients of pyrene to lake aquatic humic matter determined by fluorescence quenching and solubility enhancement. Analytica Chimica Acta 2001, 429 (1), 65-73. DOI: https://doi.org/10.1016/S0003-2670(00)01258-7.
000129-00-0	pyrene	4.106	1	Surface Water FA	FQ	20	7	Peuravuori, J. Partition coefficients of pyrene to lake aquatic humic matter determined by fluorescence quenching and solubility enhancement. Analytica Chimica Acta 2001, 429 (1), 65-73. DOI: https://doi.org/10.1016/S0003-2670(00)01258-7.
000129-00-0	pyrene	3.737	1	Surface Water HON	FQ	20	7	Peuravuori, J. Partition coefficients of pyrene to lake aquatic humic matter determined by fluorescence quenching and solubility enhancement. Analytica Chimica Acta 2001, 429 (1), 65-73. DOI: https://doi.org/10.1016/S0003-2670(00)01258-7.
000129-00-0	pyrene	3.73	1	Surface Water HON	FQ	20	7	Peuravuori, J. Partition coefficients of pyrene to lake aquatic humic matter determined by fluorescence quenching and solubility enhancement. Analytica Chimica Acta 2001, 429 (1), 65-73. DOI: https://doi.org/10.1016/S0003-2670(00)01258-7.
000129-00-0	pyrene	4.271	1	Surface Water HA	FQ	20	7	Peuravuori, J. Partition coefficients of pyrene to lake aquatic humic matter determined by fluorescence quenching and solubility enhancement. Analytica Chimica Acta 2001, 429 (1), 65-73. DOI: https://doi.org/10.1016/S0003-2670(00)01258-7.
000129-00-0	pyrene	4.188	1	Surface Water FA	FQ	20	7	Peuravuori, J. Partition coefficients of pyrene to lake aquatic humic matter determined by fluorescence quenching and solubility enhancement. Analytica Chimica Acta 2001, 429 (1), 65-73. DOI: https://doi.org/10.1016/S0003-2670(00)01258-7.
000129-00-0	pyrene	4.357	1	Surface Water HA	FQ	20	7	Peuravuori, J. Partition coefficients of pyrene to lake aquatic humic matter determined by fluorescence quenching and solubility enhancement. Analytica Chimica Acta 2001, 429 (1), 65-73. DOI: https://doi.org/10.1016/S0003-2670(00)01258-7.
000129-00-0	pyrene	4.24	1	Surface Water FA	FQ	20	7	Peuravuori, J. Partition coefficients of pyrene to lake aquatic humic matter determined by fluorescence quenching and solubility enhancement. Analytica Chimica Acta 2001, 429 (1), 65-73. DOI: https://doi.org/10.1016/S0003-2670(00)01258-7.
000129-00-0	pyrene	4.036	1	Surface Water FA	FQ	20	7	Peuravuori, J. Partition coefficients of pyrene to lake aquatic humic matter determined by fluorescence quenching and solubility enhancement. Analytica Chimica Acta 2001, 429 (1), 65-73. DOI: https://doi.org/10.1016/S0003-2670(00)01258-7.
000129-00-0	pyrene	4.108	1	Surface Water FA	FQ	20	7	Peuravuori, J. Partition coefficients of pyrene to lake aquatic humic matter determined by fluorescence quenching and solubility enhancement. Analytica Chimica Acta 2001, 429 (1), 65-73. DOI: https://doi.org/10.1016/S0003-2670(00)01258-7.
000129-00-0	pyrene	4.129	1	Surface Water DOM	FQ	20	7	Peuravuori, J. Partition coefficients of pyrene to lake aquatic humic matter determined by fluorescence quenching and solubility enhancement. Analytica Chimica Acta 2001, 429 (1), 65-73. DOI: https://doi.org/10.1016/S0003-2670(00)01258-7.
000129-00-0	pyrene	4.93	1	Surface Water HA	FQ	23	7	Mackenzie, K.; Georgi, A.; Kumke, M.; Kopinke, F.-D. Sorption of Pyrene to Dissolved Humic Substances and Related Model Polymers. 2. Solid-Phase Microextraction (SPME) and Fluorescence Quenching Technique (FQT) as Analytical Methods. Environmental Science & Technology 2002, 36 (20), 4403-4409. DOI: 10.1021/es010310x.
000129-00-0	pyrene	4.87	1	Surface Water HA	FQ	23	7	Mackenzie, K.; Georgi, A.; Kumke, M.; Kopinke, F.-D. Sorption of Pyrene to Dissolved Humic Substances and Related Model Polymers. 2. Solid-Phase Microextraction (SPME) and Fluorescence Quenching Technique (FQT) as Analytical Methods. Environmental Science & Technology 2002, 36 (20), 4403-4409. DOI: 10.1021/es010310x.
000129-00-0	pyrene	4.477	1	Surface Water HA	FQ		7	Mei, Y.; Bai, Y.; Wang, L. Effect of pH on binding of pyrene to hydrophobic fractions of dissolved organic matter (DOM) isolated from lake water. Acta Geochimica 2016, 35 (3), 288-293. DOI: 10.1007/s11631-016-0094-6.
000129-00-0	pyrene	4.249	1	Surface Water FA	FQ		7	Mei, Y.; Bai, Y.; Wang, L. Effect of pH on binding of pyrene to hydrophobic fractions of dissolved organic matter (DOM) isolated from lake water. Acta Geochimica 2016, 35 (3), 288-293. DOI: 10.1007/s11631-016-0094-6.
000129-00-0	pyrene	4.61	1	Surface Water HON	FQ		7	Mei, Y.; Bai, Y.; Wang, L. Effect of pH on binding of pyrene to hydrophobic fractions of dissolved organic matter (DOM) isolated from lake water. Acta Geochimica 2016, 35 (3), 288-293. DOI: 10.1007/s11631-016-0094-6.
000129-00-0	pyrene	4.544	1	Sediment HA	FQ			Gauthier, T. D.; Seitz, W. R.; Grant, C. L. Effects of structural and compositional variations of dissolved humic materials on pyrene Koc values. Environmental Science & Technology 1987, 21 (3), 243-248. DOI: 10.1021/es00157a003.
000129-00-0	pyrene	4.699	1	Sediment HA	FQ			Gauthier, T. D.; Seitz, W. R.; Grant, C. L. Effects of structural and compositional variations of dissolved humic materials on pyrene Koc values. Environmental Science & Technology 1987, 21 (3), 243-248. DOI: 10.1021/es00157a003.
000129-00-0	pyrene	4.462	1	Sediment HA	FQ			Gauthier, T. D.; Seitz, W. R.; Grant, C. L. Effects of structural and compositional variations of dissolved humic materials on pyrene Koc values. Environmental Science & Technology 1987, 21 (3), 243-248. DOI: 10.1021/es00157a003.
000129-00-0	pyrene	4.806	1	Sediment HA	FQ			Gauthier, T. D.; Seitz, W. R.; Grant, C. L. Effects of structural and compositional variations of dissolved humic materials on pyrene Koc values. Environmental Science & Technology 1987, 21 (3), 243-248. DOI: 10.1021/es00157a003.
000129-00-0	pyrene	4.602	1	Sediment HA	FQ			Gauthier, T. D.; Seitz, W. R.; Grant, C. L. Effects of structural and compositional variations of dissolved humic materials on pyrene Koc values. Environmental Science & Technology 1987, 21 (3), 243-248. DOI: 10.1021/es00157a003.
000129-00-0	pyrene	4.74	1	Sediment HA	FQ			Gauthier, T. D.; Seitz, W. R.; Grant, C. L. Effects of structural and compositional variations of dissolved humic materials on pyrene Koc values. Environmental Science & Technology 1987, 21 (3), 243-248. DOI: 10.1021/es00157a003.
000129-00-0	pyrene	4.367	1	Surface Water HA	FQ			Schlautman, M. A.; Morgan, J. J. Effects of aqueous chemistry on the binding of polycyclic aromatic hydrocarbons by dissolved humic materials. Environmental Science & Technology 1993, 27 (5), 961-969. DOI: 10.1021/es00042a020.
000129-00-0	pyrene	4.845	1	Surface Water HA	FQ			Perminova, I. V.; Grechishcheva, N. Y.; Petrosyan, V. S. Relationships between Structure and Binding Affinity of Humic Substances for Polycyclic Aromatic Hydrocarbons: Relevance of Molecular Descriptors. Environmental Science & Technology 1999, 33 (21), 3781-3787. DOI: 10.1021/es990056x.
000129-00-0	pyrene	4.602	1	Surface Water HA	FQ			Perminova, I. V.; Grechishcheva, N. Y.; Petrosyan, V. S. Relationships between Structure and Binding Affinity of Humic Substances for Polycyclic Aromatic Hydrocarbons: Relevance of Molecular Descriptors. Environmental Science & Technology 1999, 33 (21), 3781-3787. DOI: 10.1021/es990056x.
000129-00-0	pyrene	5.079	1	Surface Water HA	FQ			Perminova, I. V.; Grechishcheva, N. Y.; Petrosyan, V. S. Relationships between Structure and Binding Affinity of Humic Substances for Polycyclic Aromatic Hydrocarbons: Relevance of Molecular Descriptors. Environmental Science & Technology 1999, 33 (21), 3781-3787. DOI: 10.1021/es990056x.
000129-00-0	pyrene	5	1	Surface Water FA	FQ		8	Gauthier, T. D.; Shane, E. C.; Guerin, W. F.; Seitz, W. R.; Grant, C. L. Fluorescence quenching method for determining equilibrium constants for polycyclic aromatic hydrocarbons binding to dissolved humic materials. Environmental Science & Technology 1986, 20 (11), 1162-1166. DOI: 10.1021/es00153a012.
000129-00-0	pyrene	5.017	1	Surface Water FA	FQ			Gauthier, T. D.; Seitz, W. R.; Grant, C. L. Effects of structural and compositional variations of dissolved humic materials on pyrene Koc values. Environmental Science & Technology 1987, 21 (3), 243-248. DOI: 10.1021/es00157a003.
000129-00-0	pyrene	3.886	1	Surface Water FA	FQ			Schlautman, M. A.; Morgan, J. J. Effects of aqueous chemistry on the binding of polycyclic aromatic hydrocarbons by dissolved humic materials. Environmental Science & Technology 1993, 27 (5), 961-969. DOI: 10.1021/es00042a020.
000129-00-0	Pyrene	5.12	2	Soil Porewater DOM	Static Leaching (ER-H) and Passive Sampling (POM)	room temperature	4.7~8.63	Enell, A.; Lundstedt, S.; Arp, H. P. H.; Josefsson, S.; Cornelissen, G.; Wik, O.; Berggren Kleja, D. Combining Leaching and Passive Sampling To Measure the Mobility and Distribution between Porewater, DOC, and Colloids of Native Oxy-PAHs, N-PACs, and PAHs in Historically Contaminated Soil. Environmental Science & Technology 2016, 50 (21), 11797-11805. DOI: 10.1021/acs.est.6b02774.
000129-00-0	pyrene	4.77	2	Soil HA	SPME		7	Mackenzie, K.; Georgi, A.; Kumke, M.; Kopinke, F.-D. Sorption of Pyrene to Dissolved Humic Substances and Related Model Polymers. 2. Solid-Phase Microextraction (SPME) and Fluorescence Quenching Technique (FQT) as Analytical Methods. Environmental Science & Technology 2002, 36 (20), 4403-4409. DOI: 10.1021/es010310x.
000129-00-0	pyrene	4.7	2	Soil HA	SPME		7	Mackenzie, K.; Georgi, A.; Kumke, M.; Kopinke, F.-D. Sorption of Pyrene to Dissolved Humic Substances and Related Model Polymers. 2. Solid-Phase Microextraction (SPME) and Fluorescence Quenching Technique (FQT) as Analytical Methods. Environmental Science & Technology 2002, 36 (20), 4403-4409. DOI: 10.1021/es010310x.
000129-00-0	pyrene	4.47	2	Soil HA	SPME		7	Mackenzie, K.; Georgi, A.; Kumke, M.; Kopinke, F.-D. Sorption of Pyrene to Dissolved Humic Substances and Related Model Polymers. 2. Solid-Phase Microextraction (SPME) and Fluorescence Quenching Technique (FQT) as Analytical Methods. Environmental Science & Technology 2002, 36 (20), 4403-4409. DOI: 10.1021/es010310x.
000129-00-0	pyrene	4.83	2	Leonardite HA	CF-MA-HS-SPME			Hsieh, P.-C.; Lee, C.-L.; Jen, J.-F.; Chang, K.-C. Complexation-flocculation combined with microwave-assisted headspace solid-phase microextraction in determining the binding constants of hydrophobic organic pollutants to dissolved humic substances. Analyst 2014, 140. DOI: 10.1039/C4AN01923G.
000129-00-0	pyrene	4.863	2	Peat HA	SPME	room temperature		Delgado-Moreno, L.; Wu, L.; Gan, J. Application of isotope dilution method for measuring bioavailability of organic contaminants sorbed to dissolved organic matter (DOM). Aquatic Toxicology 2015, 165, 129-135. DOI: https://doi.org/10.1016/j.aquatox.2015.05.006.
000129-00-0	pyrene	4.638	2	Peat HA	FQ	20	7	Peuravuori, J. Partition coefficients of pyrene to lake aquatic humic matter determined by fluorescence quenching and solubility enhancement. Analytica Chimica Acta 2001, 429 (1), 65-73. DOI: https://doi.org/10.1016/S0003-2670(00)01258-7.
000129-00-0	pyrene	4.121	2	Peat FA	FQ	20	7	Peuravuori, J. Partition coefficients of pyrene to lake aquatic humic matter determined by fluorescence quenching and solubility enhancement. Analytica Chimica Acta 2001, 429 (1), 65-73. DOI: https://doi.org/10.1016/S0003-2670(00)01258-7.
000129-00-0	pyrene	3.628	2	Soil Porewater DOM	FQ		7.6	Marschner, B.; Winkler, R.; JÖdemann, D. Factors Controlling the Partitioning of Pyrene to Dissolved Organic Matter Extracted from Different Soils. European Journal of Soil Science 2004, 56, 299-306. DOI: 10.1111/j.1365-2389.2004.00678.x.
000129-00-0	pyrene	3.913	2	Soil Porewater DOM	FQ		6.8	Marschner, B.; Winkler, R.; JÖdemann, D. Factors Controlling the Partitioning of Pyrene to Dissolved Organic Matter Extracted from Different Soils. European Journal of Soil Science 2004, 56, 299-306. DOI: 10.1111/j.1365-2389.2004.00678.x.
000129-00-0	pyrene	3.925	2	Soil Porewater DOM	FQ		7.2	Marschner, B.; Winkler, R.; JÖdemann, D. Factors Controlling the Partitioning of Pyrene to Dissolved Organic Matter Extracted from Different Soils. European Journal of Soil Science 2004, 56, 299-306. DOI: 10.1111/j.1365-2389.2004.00678.x.
000129-00-0	pyrene	3.804	2	Soil Porewater DOM	FQ		7.6	Marschner, B.; Winkler, R.; JÖdemann, D. Factors Controlling the Partitioning of Pyrene to Dissolved Organic Matter Extracted from Different Soils. European Journal of Soil Science 2004, 56, 299-306. DOI: 10.1111/j.1365-2389.2004.00678.x.
000129-00-0	pyrene	4	2	Soil Porewater DOM	FQ		7.1	Marschner, B.; Winkler, R.; JÖdemann, D. Factors Controlling the Partitioning of Pyrene to Dissolved Organic Matter Extracted from Different Soils. European Journal of Soil Science 2004, 56, 299-306. DOI: 10.1111/j.1365-2389.2004.00678.x.
000129-00-0	pyrene	4.204	2	Soil Porewater DOM	FQ		7.8	Marschner, B.; Winkler, R.; JÖdemann, D. Factors Controlling the Partitioning of Pyrene to Dissolved Organic Matter Extracted from Different Soils. European Journal of Soil Science 2004, 56, 299-306. DOI: 10.1111/j.1365-2389.2004.00678.x.
000129-00-0	pyrene	4.094	2	Soil Porewater DOM	FQ		8.4	Marschner, B.; Winkler, R.; JÖdemann, D. Factors Controlling the Partitioning of Pyrene to Dissolved Organic Matter Extracted from Different Soils. European Journal of Soil Science 2004, 56, 299-306. DOI: 10.1111/j.1365-2389.2004.00678.x.
000129-00-0	pyrene	3.878	2	Soil Porewater DOM	FQ		8	Marschner, B.; Winkler, R.; JÖdemann, D. Factors Controlling the Partitioning of Pyrene to Dissolved Organic Matter Extracted from Different Soils. European Journal of Soil Science 2004, 56, 299-306. DOI: 10.1111/j.1365-2389.2004.00678.x.
000129-00-0	pyrene	3.86	2	Peat DOM	FQ		7.4	Marschner, B.; Winkler, R.; JÖdemann, D. Factors Controlling the Partitioning of Pyrene to Dissolved Organic Matter Extracted from Different Soils. European Journal of Soil Science 2004, 56, 299-306. DOI: 10.1111/j.1365-2389.2004.00678.x.
000129-00-0	pyrene	5.43	2	Soil HA	FQ	25	7	Kobayashi, T.; Sumida, H. Effects of humic acids on the sorption and bioavailability of pyrene and 1,2-dihydroxynaphthalene. Soil Science and Plant Nutrition 2015, 61 (sup1), 113-122. DOI: 10.1080/00380768.2015.1024581.
000129-00-0	pyrene	4.633	2	Soil HA	FQ	25	7	Kobayashi, T.; Sumida, H. Effects of humic acids on the sorption and bioavailability of pyrene and 1,2-dihydroxynaphthalene. Soil Science and Plant Nutrition 2015, 61 (sup1), 113-122. DOI: 10.1080/00380768.2015.1024581.
000129-00-0	pyrene	5.69	2	Soil HA	FQ	23	6	Laor, Y.; Rebhun, M. Evidence for Nonlinear Binding of PAHs to Dissolved Humic Acids. Environmental Science & Technology 2002, 36 (5), 955-961. DOI: 10.1021/es001996g.
000129-00-0	pyrene	5.248	2	Peat HA	FQ	23	6	Laor, Y.; Rebhun, M. Evidence for Nonlinear Binding of PAHs to Dissolved Humic Acids. Environmental Science & Technology 2002, 36 (5), 955-961. DOI: 10.1021/es001996g.
000129-00-0	pyrene	5.23	2	Soil HA	FQ		8	Gauthier, T. D.; Shane, E. C.; Guerin, W. F.; Seitz, W. R.; Grant, C. L. Fluorescence quenching method for determining equilibrium constants for polycyclic aromatic hydrocarbons binding to dissolved humic materials. Environmental Science & Technology 1986, 20 (11), 1162-1166. DOI: 10.1021/es00153a012.
000129-00-0	pyrene	5.079	2	Soil HA	FQ		8	Gauthier, T. D.; Shane, E. C.; Guerin, W. F.; Seitz, W. R.; Grant, C. L. Fluorescence quenching method for determining equilibrium constants for polycyclic aromatic hydrocarbons binding to dissolved humic materials. Environmental Science & Technology 1986, 20 (11), 1162-1166. DOI: 10.1021/es00153a012.
000129-00-0	pyrene	5.097	2	Soil HA	FQ			Gauthier, T. D.; Seitz, W. R.; Grant, C. L. Effects of structural and compositional variations of dissolved humic materials on pyrene Koc values. Environmental Science & Technology 1987, 21 (3), 243-248. DOI: 10.1021/es00157a003.
000129-00-0	pyrene	4.944	2	Soil HA	FQ			Gauthier, T. D.; Seitz, W. R.; Grant, C. L. Effects of structural and compositional variations of dissolved humic materials on pyrene Koc values. Environmental Science & Technology 1987, 21 (3), 243-248. DOI: 10.1021/es00157a003.
000129-00-0	pyrene	5.207	2	Soil HA	FQ			Gauthier, T. D.; Seitz, W. R.; Grant, C. L. Effects of structural and compositional variations of dissolved humic materials on pyrene Koc values. Environmental Science & Technology 1987, 21 (3), 243-248. DOI: 10.1021/es00157a003.
000129-00-0	pyrene	5.505	2	Soil HA	FQ			Gauthier, T. D.; Seitz, W. R.; Grant, C. L. Effects of structural and compositional variations of dissolved humic materials on pyrene Koc values. Environmental Science & Technology 1987, 21 (3), 243-248. DOI: 10.1021/es00157a003.
000129-00-0	pyrene	5.38	2	Soil HA	FQ			Gauthier, T. D.; Seitz, W. R.; Grant, C. L. Effects of structural and compositional variations of dissolved humic materials on pyrene Koc values. Environmental Science & Technology 1987, 21 (3), 243-248. DOI: 10.1021/es00157a003.
000129-00-0	pyrene	5.079	2	Soil HA	FQ			Perminova, I. V.; Grechishcheva, N. Y.; Petrosyan, V. S. Relationships between Structure and Binding Affinity of Humic Substances for Polycyclic Aromatic Hydrocarbons: Relevance of Molecular Descriptors. Environmental Science & Technology 1999, 33 (21), 3781-3787. DOI: 10.1021/es990056x.
000129-00-0	pyrene	5.146	2	Soil HA	FQ			Perminova, I. V.; Grechishcheva, N. Y.; Petrosyan, V. S. Relationships between Structure and Binding Affinity of Humic Substances for Polycyclic Aromatic Hydrocarbons: Relevance of Molecular Descriptors. Environmental Science & Technology 1999, 33 (21), 3781-3787. DOI: 10.1021/es990056x.
000129-00-0	pyrene	4.903	2	Soil HA	FQ			Perminova, I. V.; Grechishcheva, N. Y.; Petrosyan, V. S. Relationships between Structure and Binding Affinity of Humic Substances for Polycyclic Aromatic Hydrocarbons: Relevance of Molecular Descriptors. Environmental Science & Technology 1999, 33 (21), 3781-3787. DOI: 10.1021/es990056x.
000129-00-0	pyrene	4.845	2	Soil HA	FQ			Perminova, I. V.; Grechishcheva, N. Y.; Petrosyan, V. S. Relationships between Structure and Binding Affinity of Humic Substances for Polycyclic Aromatic Hydrocarbons: Relevance of Molecular Descriptors. Environmental Science & Technology 1999, 33 (21), 3781-3787. DOI: 10.1021/es990056x.
000129-00-0	pyrene	5.23	2	Soil HA	FQ			Perminova, I. V.; Grechishcheva, N. Y.; Petrosyan, V. S. Relationships between Structure and Binding Affinity of Humic Substances for Polycyclic Aromatic Hydrocarbons: Relevance of Molecular Descriptors. Environmental Science & Technology 1999, 33 (21), 3781-3787. DOI: 10.1021/es990056x.
000129-00-0	pyrene	5.146	2	Soil HA	FQ			Perminova, I. V.; Grechishcheva, N. Y.; Petrosyan, V. S. Relationships between Structure and Binding Affinity of Humic Substances for Polycyclic Aromatic Hydrocarbons: Relevance of Molecular Descriptors. Environmental Science & Technology 1999, 33 (21), 3781-3787. DOI: 10.1021/es990056x.
000129-00-0	pyrene	5	2	Soil HA	FQ			Perminova, I. V.; Grechishcheva, N. Y.; Petrosyan, V. S. Relationships between Structure and Binding Affinity of Humic Substances for Polycyclic Aromatic Hydrocarbons: Relevance of Molecular Descriptors. Environmental Science & Technology 1999, 33 (21), 3781-3787. DOI: 10.1021/es990056x.
000129-00-0	pyrene	5	2	Soil HA	FQ			Perminova, I. V.; Grechishcheva, N. Y.; Petrosyan, V. S. Relationships between Structure and Binding Affinity of Humic Substances for Polycyclic Aromatic Hydrocarbons: Relevance of Molecular Descriptors. Environmental Science & Technology 1999, 33 (21), 3781-3787. DOI: 10.1021/es990056x.
000129-00-0	pyrene	5.114	2	Soil HA	FQ			Perminova, I. V.; Grechishcheva, N. Y.; Petrosyan, V. S. Relationships between Structure and Binding Affinity of Humic Substances for Polycyclic Aromatic Hydrocarbons: Relevance of Molecular Descriptors. Environmental Science & Technology 1999, 33 (21), 3781-3787. DOI: 10.1021/es990056x.
000129-00-0	pyrene	5.079	2	Soil HA	FQ			Perminova, I. V.; Grechishcheva, N. Y.; Petrosyan, V. S. Relationships between Structure and Binding Affinity of Humic Substances for Polycyclic Aromatic Hydrocarbons: Relevance of Molecular Descriptors. Environmental Science & Technology 1999, 33 (21), 3781-3787. DOI: 10.1021/es990056x.
000129-00-0	pyrene	4.845	2	Soil HA	FQ			Perminova, I. V.; Grechishcheva, N. Y.; Petrosyan, V. S. Relationships between Structure and Binding Affinity of Humic Substances for Polycyclic Aromatic Hydrocarbons: Relevance of Molecular Descriptors. Environmental Science & Technology 1999, 33 (21), 3781-3787. DOI: 10.1021/es990056x.
000129-00-0	pyrene	5.146	2	Soil HA	FQ			Perminova, I. V.; Grechishcheva, N. Y.; Petrosyan, V. S. Relationships between Structure and Binding Affinity of Humic Substances for Polycyclic Aromatic Hydrocarbons: Relevance of Molecular Descriptors. Environmental Science & Technology 1999, 33 (21), 3781-3787. DOI: 10.1021/es990056x.
000129-00-0	pyrene	5.255	2	Soil HA	FQ			Perminova, I. V.; Grechishcheva, N. Y.; Petrosyan, V. S. Relationships between Structure and Binding Affinity of Humic Substances for Polycyclic Aromatic Hydrocarbons: Relevance of Molecular Descriptors. Environmental Science & Technology 1999, 33 (21), 3781-3787. DOI: 10.1021/es990056x.
000129-00-0	pyrene	5.342	2	Soil HA	FQ			Perminova, I. V.; Grechishcheva, N. Y.; Petrosyan, V. S. Relationships between Structure and Binding Affinity of Humic Substances for Polycyclic Aromatic Hydrocarbons: Relevance of Molecular Descriptors. Environmental Science & Technology 1999, 33 (21), 3781-3787. DOI: 10.1021/es990056x.
000129-00-0	pyrene	5.38	2	Soil HA	FQ			Perminova, I. V.; Grechishcheva, N. Y.; Petrosyan, V. S. Relationships between Structure and Binding Affinity of Humic Substances for Polycyclic Aromatic Hydrocarbons: Relevance of Molecular Descriptors. Environmental Science & Technology 1999, 33 (21), 3781-3787. DOI: 10.1021/es990056x.
000129-00-0	pyrene	5	2	Soil HA+FA	FQ			Perminova, I. V.; Grechishcheva, N. Y.; Petrosyan, V. S. Relationships between Structure and Binding Affinity of Humic Substances for Polycyclic Aromatic Hydrocarbons: Relevance of Molecular Descriptors. Environmental Science & Technology 1999, 33 (21), 3781-3787. DOI: 10.1021/es990056x.
000129-00-0	pyrene	4.74	2	Soil FA	FQ		8	Gauthier, T. D.; Shane, E. C.; Guerin, W. F.; Seitz, W. R.; Grant, C. L. Fluorescence quenching method for determining equilibrium constants for polycyclic aromatic hydrocarbons binding to dissolved humic materials. Environmental Science & Technology 1986, 20 (11), 1162-1166. DOI: 10.1021/es00153a012.
000129-00-0	pyrene	4.82	2	Soil FA	FQ			Gauthier, T. D.; Seitz, W. R.; Grant, C. L. Effects of structural and compositional variations of dissolved humic materials on pyrene Koc values. Environmental Science & Technology 1987, 21 (3), 243-248. DOI: 10.1021/es00157a003.
000129-00-0	pyrene	4.732	2	Soil FA	FQ			Gauthier, T. D.; Seitz, W. R.; Grant, C. L. Effects of structural and compositional variations of dissolved humic materials on pyrene Koc values. Environmental Science & Technology 1987, 21 (3), 243-248. DOI: 10.1021/es00157a003.
000129-00-0	pyrene	4.114	2	Soil FA	FQ			Perminova, I. V.; Grechishcheva, N. Y.; Petrosyan, V. S. Relationships between Structure and Binding Affinity of Humic Substances for Polycyclic Aromatic Hydrocarbons: Relevance of Molecular Descriptors. Environmental Science & Technology 1999, 33 (21), 3781-3787. DOI: 10.1021/es990056x.
000129-00-0	pyrene	4.699	2	Soil FA	FQ			Perminova, I. V.; Grechishcheva, N. Y.; Petrosyan, V. S. Relationships between Structure and Binding Affinity of Humic Substances for Polycyclic Aromatic Hydrocarbons: Relevance of Molecular Descriptors. Environmental Science & Technology 1999, 33 (21), 3781-3787. DOI: 10.1021/es990056x.
000129-00-0	pyrene	5.041	2	Soil FA	FQ			Perminova, I. V.; Grechishcheva, N. Y.; Petrosyan, V. S. Relationships between Structure and Binding Affinity of Humic Substances for Polycyclic Aromatic Hydrocarbons: Relevance of Molecular Descriptors. Environmental Science & Technology 1999, 33 (21), 3781-3787. DOI: 10.1021/es990056x.
000129-00-0	pyrene	3.61	2	Soil Porewater DOM	FQ	25	6.8	Herbert, B. E.; Bertsch, P. M.; Novak, J. M. Pyrene sorption by water-soluble organic carbon. Environmental Science & Technology 1993, 27, 398-403.
000129-00-0	pyrene	4.85	2	Soil Porewater DOM	FQ		4.6~5.4	Raber, B.; Kögel-Knabner, I.; Stein, C.; Klem, D. Partitioning of polycyclic aromatic hydrocarbons to dissolved organic matter from different soils. Chemosphere 1998, 36 (1), 79-97. DOI: https://doi.org/10.1016/S0045-6535(97)00352-4.
000129-00-0	pyrene	5.01	2	Soil Porewater DOM	FQ		4.6~5.4	Raber, B.; Kögel-Knabner, I.; Stein, C.; Klem, D. Partitioning of polycyclic aromatic hydrocarbons to dissolved organic matter from different soils. Chemosphere 1998, 36 (1), 79-97. DOI: https://doi.org/10.1016/S0045-6535(97)00352-4.
000129-00-0	pyrene	4.7	3	Roth HA	SPME		6	Poerschmann, J.; Kopinke, F.-D. Sorption of Very Hydrophobic Organic Compounds (VHOCs) on Dissolved Humic Organic Matter (DOM). 2. Measurement of Sorption and Application of a Flory−Huggins Concept To Interpret the Data †. Environmental science & technology 2001, 35, 1142-1148. DOI: 10.1021/es0017615.
000129-00-0	pyrene	5.55	3	Aldrich HA	Solid Phase Dosing and Sampling	21	7.03~7.82	ter Laak, T. L.; Durjava, M.; Struijs, J.; Hermens, J. L. M. Solid Phase Dosing and Sampling Technique To Determine Partition Coefficients of Hydrophobic Chemicals in Complex Matrixes. Environmental Science & Technology 2005, 39 (10), 3736-3742. DOI: 10.1021/es048406p.
000129-00-0	Pyrene	5.15	3	Aldrich HA	Passive dosing	25	7.8	Neale, P. A.; Antony, A.; Gernjak, W.; Leslie, G.; Escher, B. I. Natural versus wastewater derived dissolved organic carbon: Implications for the environmental fate of organic micropollutants. Water Research 2011, 45 (14), 4227-4237. DOI: https://doi.org/10.1016/j.watres.2011.05.038.
000129-00-0	pyrene	5.51	3	Aldrich HA	Passive dosing	25	5.5~7	Kim, S.-J.; Kwon, J.-H. Determination of Partition Coefficients for Selected PAHs between Water and Dissolved Organic Matter. CLEAN – Soil, Air, Water 2010, 38, 797-802. DOI: 10.1002/clen.201000113.
000129-00-0	Pyrene	4.96	3	Roth HA	SPME	25	7	Georgi, A.; Kopinke, F. D. Validation of a modified Flory‐Huggins concept for description of hydrophobic organic compound sorption on dissolved humic substances. Environmental toxicology and chemistry 2002, 21 (9), 1766-1774. DOI: 10.1002/etc.5620210902 (acccessed 1/7/2025).
000129-00-0	pyrene	4.95	3	Roth HA	SPME		7	Mackenzie, K.; Georgi, A.; Kumke, M.; Kopinke, F.-D. Sorption of Pyrene to Dissolved Humic Substances and Related Model Polymers. 2. Solid-Phase Microextraction (SPME) and Fluorescence Quenching Technique (FQT) as Analytical Methods. Environmental Science & Technology 2002, 36 (20), 4403-4409. DOI: 10.1021/es010310x.
000129-00-0	pyrene	4.93	3	Roth HA	SPME	23	7	Mackenzie, K.; Georgi, A.; Kumke, M.; Kopinke, F.-D. Sorption of Pyrene to Dissolved Humic Substances and Related Model Polymers. 2. Solid-Phase Microextraction (SPME) and Fluorescence Quenching Technique (FQT) as Analytical Methods. Environmental Science & Technology 2002, 36 (20), 4403-4409. DOI: 10.1021/es010310x.
000129-00-0	Pyrene	4.293	3	Aldrich HA	nd-SPME	22	7	Smith, K. E. C.; Thullner, M.; Wick, L. Y.; Harms, H. Dissolved Organic Carbon Enhances the Mass Transfer of Hydrophobic Organic Compounds from Nonaqueous Phase Liquids (NAPLs) into the Aqueous Phase. Environmental Science & Technology 2011, 45 (20), 8741-8747. DOI: 10.1021/es202983k.
000129-00-0	Pyrene	4.666	3	Aldrich HA	nd-SPME	22	7	Smith, K. E. C.; Thullner, M.; Wick, L. Y.; Harms, H. Dissolved Organic Carbon Enhances the Mass Transfer of Hydrophobic Organic Compounds from Nonaqueous Phase Liquids (NAPLs) into the Aqueous Phase. Environmental Science & Technology 2011, 45 (20), 8741-8747. DOI: 10.1021/es202983k.
000129-00-0	pyrene	5.23	3	Aldrich HA	SPME	room temperature		Delgado-Moreno, L.; Wu, L.; Gan, J. Application of isotope dilution method for measuring bioavailability of organic contaminants sorbed to dissolved organic matter (DOM). Aquatic Toxicology 2015, 165, 129-135. DOI: https://doi.org/10.1016/j.aquatox.2015.05.006.
000129-00-0	pyrene	5.54	3	Roth HA	FQ			Kopinke, F. D.; Georgi, A.; Mackenzie, K. Sorption and Chemical Reactions of PAHs with Dissolved Humic Substances and Related Model Polymers. Acta hydrochimica et hydrobiologica 2001, 28, 385-399. DOI: 10.1002/1521-401X(20017)28:7<385::AID-AHEH385>3.0.CO;2-A.
000129-00-0	pyrene	4.817	3	Fluka HA	FQ	20	7	Peuravuori, J. Partition coefficients of pyrene to lake aquatic humic matter determined by fluorescence quenching and solubility enhancement. Analytica Chimica Acta 2001, 429 (1), 65-73. DOI: https://doi.org/10.1016/S0003-2670(00)01258-7.
000129-00-0	pyrene	5.54	3	Roth HA	FQ	23	7	Mackenzie, K.; Georgi, A.; Kumke, M.; Kopinke, F.-D. Sorption of Pyrene to Dissolved Humic Substances and Related Model Polymers. 2. Solid-Phase Microextraction (SPME) and Fluorescence Quenching Technique (FQT) as Analytical Methods. Environmental Science & Technology 2002, 36 (20), 4403-4409. DOI: 10.1021/es010310x.
000129-00-0	pyrene	5.53	3	Roth HA	FQ	23	7	Mackenzie, K.; Georgi, A.; Kumke, M.; Kopinke, F.-D. Sorption of Pyrene to Dissolved Humic Substances and Related Model Polymers. 2. Solid-Phase Microextraction (SPME) and Fluorescence Quenching Technique (FQT) as Analytical Methods. Environmental Science & Technology 2002, 36 (20), 4403-4409. DOI: 10.1021/es010310x.
000129-00-0	pyrene	4.983	3	Aldrich HA	FQ		7.6	Marschner, B.; Winkler, R.; JÖdemann, D. Factors Controlling the Partitioning of Pyrene to Dissolved Organic Matter Extracted from Different Soils. European Journal of Soil Science 2004, 56, 299-306. DOI: 10.1111/j.1365-2389.2004.00678.x.
000129-00-0	pyrene	4.833	3	Wako HA	FQ	25	7	Kobayashi, T.; Sumida, H. Effects of humic acids on the sorption and bioavailability of pyrene and 1,2-dihydroxynaphthalene. Soil Science and Plant Nutrition 2015, 61 (sup1), 113-122. DOI: 10.1080/00380768.2015.1024581.
000129-00-0	pyrene	5.134	3	Fluka HA	FQ	25	7	Kobayashi, T.; Sumida, H. Effects of humic acids on the sorption and bioavailability of pyrene and 1,2-dihydroxynaphthalene. Soil Science and Plant Nutrition 2015, 61 (sup1), 113-122. DOI: 10.1080/00380768.2015.1024581.
000129-00-0	pyrene	5.057	3	Aldrich HA	FQ	25	7	Kobayashi, T.; Sumida, H. Effects of humic acids on the sorption and bioavailability of pyrene and 1,2-dihydroxynaphthalene. Soil Science and Plant Nutrition 2015, 61 (sup1), 113-122. DOI: 10.1080/00380768.2015.1024581.
000129-00-0	pyrene	5.017	3	Aldrich HA	FQ			Gauthier, T. D.; Seitz, W. R.; Grant, C. L. Effects of structural and compositional variations of dissolved humic materials on pyrene Koc values. Environmental Science & Technology 1987, 21 (3), 243-248. DOI: 10.1021/es00157a003.
000129-00-0	pyrene	5.079	3	Aldrich HA	FQ		6.5	Zimmermann, U.; Skrivanek, T.; Löhmannsröben, H.-G. Fluorescence quenching of polycyclic aromatic compounds by humic substances. Part 1. Methodology for the determination of sorption coefficients. Journal of Environmental Monitoring 1999, 1 (6), 525-532, 10.1039/A905665C. DOI: 10.1039/A905665C.
000129-00-0	pyrene	5.362	3	Aldrich HA	FQ			Perminova, I. V.; Grechishcheva, N. Y.; Petrosyan, V. S. Relationships between Structure and Binding Affinity of Humic Substances for Polycyclic Aromatic Hydrocarbons: Relevance of Molecular Descriptors. Environmental Science & Technology 1999, 33 (21), 3781-3787. DOI: 10.1021/es990056x.
000129-00-0	pyrene	5.28	4	Sodium dodecyl sulfate micelle	Passive dosing	25	5.5~7	Kim, S.-J.; Kwon, J.-H. Determination of Partition Coefficients for Selected PAHs between Water and Dissolved Organic Matter. CLEAN – Soil, Air, Water 2010, 38, 797-802. DOI: 10.1002/clen.201000113.
000129-00-0	pyrene	2.78	4	2-hydroxypropyl-b-cyclodextrin	Passive dosing	25	5.5~7	Kim, S.-J.; Kwon, J.-H. Determination of Partition Coefficients for Selected PAHs between Water and Dissolved Organic Matter. CLEAN – Soil, Air, Water 2010, 38, 797-802. DOI: 10.1002/clen.201000113.
000131-57-7	benzophenone-3	4.82	1	Sediment Porewater DOM	TFME	25	7	Ahmadi, F.; Sparham, C.; Pawliszyn, J. A flow-through aqueous standard generation system for thin film microextraction investigations of UV filters and biocides partitioning to different environmental compartments. Environmental Pollution 2017, 230, 663-673. DOI: https://doi.org/10.1016/j.envpol.2017.06.092.
000131-57-7	oxybenzone	3.33	2	Soil Porewater DOM	SPME	21	5.38	Haftka, J. J. H.; Scherpenisse, P.; Jonker, M. T. O.; Hermens, J. L. M. Using Polyacrylate-Coated SPME Fibers To Quantify Sorption of Polar and Ionic Organic Contaminants to Dissolved Organic Carbon. Environmental Science & Technology 2013, 47 (9), 4455-4462. DOI: 10.1021/es400236a.
000131-57-7	benzophenone-3	4.89	3	Aldrich HA	TFME	25	7	Ahmadi, F.; Sparham, C.; Pawliszyn, J. A flow-through aqueous standard generation system for thin film microextraction investigations of UV filters and biocides partitioning to different environmental compartments. Environmental Pollution 2017, 230, 663-673. DOI: https://doi.org/10.1016/j.envpol.2017.06.092.
000140-66-9	p-tert-octylphenol	4.94	1	Surface Water HA	FQ	22	7	Yamamoto, H.; Liljestrand, H. M.; Shimizu, Y.; Morita, M. Effects of Physical−Chemical Characteristics on the Sorption of Selected Endocrine Disruptors by Dissolved Organic Matter Surrogates. Environmental Science & Technology 2003, 37 (12), 2646-2657. DOI: 10.1021/es026405w.
000140-66-9	p-tert-octylphenol	4.63	1	Surface Water FA	FQ	22	7	Yamamoto, H.; Liljestrand, H. M.; Shimizu, Y.; Morita, M. Effects of Physical−Chemical Characteristics on the Sorption of Selected Endocrine Disruptors by Dissolved Organic Matter Surrogates. Environmental Science & Technology 2003, 37 (12), 2646-2657. DOI: 10.1021/es026405w.
000140-66-9	p-tert-octylphenol	4.84	3	Aldrich HA	FQ	22	7	Yamamoto, H.; Liljestrand, H. M.; Shimizu, Y.; Morita, M. Effects of Physical−Chemical Characteristics on the Sorption of Selected Endocrine Disruptors by Dissolved Organic Matter Surrogates. Environmental Science & Technology 2003, 37 (12), 2646-2657. DOI: 10.1021/es026405w.
000140-66-9	p-tert-octylphenol	5.16	4	Tannic Acid	FQ	22	7	Yamamoto, H.; Liljestrand, H. M.; Shimizu, Y.; Morita, M. Effects of Physical−Chemical Characteristics on the Sorption of Selected Endocrine Disruptors by Dissolved Organic Matter Surrogates. Environmental Science & Technology 2003, 37 (12), 2646-2657. DOI: 10.1021/es026405w.
000142-82-5	n-heptane	3.36	3	Roth HA	SPME		6	Poerschmann, J.; Kopinke, F.-D. Sorption of Very Hydrophobic Organic Compounds (VHOCs) on Dissolved Humic Organic Matter (DOM). 2. Measurement of Sorption and Application of a Flory−Huggins Concept To Interpret the Data †. Environmental science & technology 2001, 35, 1142-1148. DOI: 10.1021/es0017615.
000142-82-5	n-heptane	4.08	3	Roth HA	SPME	25	7	Georgi, A.; Kopinke, F. D. Validation of a modified Flory‐Huggins concept for description of hydrophobic organic compound sorption on dissolved humic substances. Environmental toxicology and chemistry 2002, 21 (9), 1766-1774. DOI: 10.1002/etc.5620210902 (acccessed 1/7/2025).
000150-19-6	3-methoxyphenol	2	3	Aldrich HA	SPME		7.3	Ohlenbusch, G.; Frimmel, F. H. Investigations on the sorption of phenols to dissolved organic matter by a QSAR study. Chemosphere 2001, 45 (3), 323-327. DOI: https://doi.org/10.1016/S0045-6535(00)00588-9.
000191-24-2	benzo[ghi]perylene	5.62	1	Sediment Porewater DOM	SPME			Hawthorne, S. B.; Grabanski, C. B.; Miller, D. J.; Kreitinger, J. P. Solid-Phase Microextraction Measurement of Parent and Alkyl Polycyclic Aromatic Hydrocarbons in Milliliter Sediment Pore Water Samples and Determination of KDOC Values. Environmental Science & Technology 2005, 39 (8), 2795-2803. DOI: 10.1021/es0405171.
000191-24-2	benzo[ghi]perylene	5.58	1	Sediment Porewater DOM	SPME			Hawthorne, S. B.; Grabanski, C. B.; Miller, D. J.; Kreitinger, J. P. Solid-Phase Microextraction Measurement of Parent and Alkyl Polycyclic Aromatic Hydrocarbons in Milliliter Sediment Pore Water Samples and Determination of KDOC Values. Environmental Science & Technology 2005, 39 (8), 2795-2803. DOI: 10.1021/es0405171.
000191-24-2	benzo[ghi]perylene	4.88	1	Sediment Porewater DOM	SPME			Hawthorne, S. B.; Grabanski, C. B.; Miller, D. J.; Kreitinger, J. P. Solid-Phase Microextraction Measurement of Parent and Alkyl Polycyclic Aromatic Hydrocarbons in Milliliter Sediment Pore Water Samples and Determination of KDOC Values. Environmental Science & Technology 2005, 39 (8), 2795-2803. DOI: 10.1021/es0405171.
000191-24-2	benzo[ghi]perylene	5.31	1	Sediment Porewater DOM	SPME			Hawthorne, S. B.; Grabanski, C. B.; Miller, D. J.; Kreitinger, J. P. Solid-Phase Microextraction Measurement of Parent and Alkyl Polycyclic Aromatic Hydrocarbons in Milliliter Sediment Pore Water Samples and Determination of KDOC Values. Environmental Science & Technology 2005, 39 (8), 2795-2803. DOI: 10.1021/es0405171.
000191-24-2	Benzo(ghi)perylene	7.03	2	Soil Porewater DOM	Static Leaching (ER-H) and Passive Sampling (POM)	room temperature	4.7~8.63	Hawthorne, S. B.; Grabanski, C. B.; Miller, D. J.; Kreitinger, J. P. Solid-Phase Microextraction Measurement of Parent and Alkyl Polycyclic Aromatic Hydrocarbons in Milliliter Sediment Pore Water Samples and Determination of KDOC Values. Environmental Science & Technology 2005, 39 (8), 2795-2803. DOI: 10.1021/es0405171.
000191-24-2	benzo[ghi]perylene	7.43	3	Aldrich HA	Solid Phase Dosing and Sampling	21	7.03~7.82	ter Laak, T. L.; Durjava, M.; Struijs, J.; Hermens, J. L. M. Solid Phase Dosing and Sampling Technique To Determine Partition Coefficients of Hydrophobic Chemicals in Complex Matrixes. Environmental Science & Technology 2005, 39 (10), 3736-3742. DOI: 10.1021/es048406p.
000191-24-2	benzo[g,h,i]perylene	7.29	3	Aldrich HA	Passive dosing	25	5.5~7	Kim, S.-J.; Kwon, J.-H. Determination of Partition Coefficients for Selected PAHs between Water and Dissolved Organic Matter. CLEAN – Soil, Air, Water 2010, 38, 797-802. DOI: 10.1002/clen.201000113.
000191-24-2	benzo[g,h,i]perylene	5.76	4	Sodium dodecyl sulfate micelle	Passive dosing	25	5.5~7	Kim, S.-J.; Kwon, J.-H. Determination of Partition Coefficients for Selected PAHs between Water and Dissolved Organic Matter. CLEAN – Soil, Air, Water 2010, 38, 797-802. DOI: 10.1002/clen.201000113.
000192-97-2	benzo[e]pyrene	5.47	1	Sediment Porewater DOM	Passive sampling	20	7	Haftka, J. J. H.; Govers, H. A. J.; Parsons, J. R. Influence of temperature and origin of dissolved organic matter on the partitioning behavior of polycyclic aromatic hydrocarbons. Environmental Science and Pollution Research 2010, 17 (5), 1070-1079. DOI: 10.1007/s11356-009-0263-9.
000192-97-2	benzo[e]pyrene	4.93	1	Sediment Porewater DOM	Passive sampling	20	7	Haftka, J. J. H.; Govers, H. A. J.; Parsons, J. R. Influence of temperature and origin of dissolved organic matter on the partitioning behavior of polycyclic aromatic hydrocarbons. Environmental Science and Pollution Research 2010, 17 (5), 1070-1079. DOI: 10.1007/s11356-009-0263-9.
000192-97-2	benzo[e]pyrene	5.14	1	Sediment Porewater DOM	Passive sampling	20	7	Haftka, J. J. H.; Govers, H. A. J.; Parsons, J. R. Influence of temperature and origin of dissolved organic matter on the partitioning behavior of polycyclic aromatic hydrocarbons. Environmental Science and Pollution Research 2010, 17 (5), 1070-1079. DOI: 10.1007/s11356-009-0263-9.
000192-97-2	benzo[e]pyrene	5.74	1	Sediment Porewater DOM	Passive sampling	20	7	Haftka, J. J. H.; Govers, H. A. J.; Parsons, J. R. Influence of temperature and origin of dissolved organic matter on the partitioning behavior of polycyclic aromatic hydrocarbons. Environmental Science and Pollution Research 2010, 17 (5), 1070-1079. DOI: 10.1007/s11356-009-0263-9.
000192-97-2	benzo[e]pyrene	6.6	1	Sediment Porewater DOM	Passive sampling	20	7	Haftka, J. J. H.; Govers, H. A. J.; Parsons, J. R. Influence of temperature and origin of dissolved organic matter on the partitioning behavior of polycyclic aromatic hydrocarbons. Environmental Science and Pollution Research 2010, 17 (5), 1070-1079. DOI: 10.1007/s11356-009-0263-9.
000192-97-2	benzo[e]pyrene	6.23	1	Sediment Porewater DOM	Passive sampling	20.1	7	Haftka, J. J. H.; Govers, H. A. J.; Parsons, J. R. Influence of temperature and origin of dissolved organic matter on the partitioning behavior of polycyclic aromatic hydrocarbons. Environmental Science and Pollution Research 2010, 17 (5), 1070-1079. DOI: 10.1007/s11356-009-0263-9.
000192-97-2	benzo[e]pyrene	5.67	1	Sediment Porewater DOM	Passive sampling	36	7	Haftka, J. J. H.; Govers, H. A. J.; Parsons, J. R. Influence of temperature and origin of dissolved organic matter on the partitioning behavior of polycyclic aromatic hydrocarbons. Environmental Science and Pollution Research 2010, 17 (5), 1070-1079. DOI: 10.1007/s11356-009-0263-9.
000193-39-5	Indeno(1,2,3-cd)pyrene	7.02	2	Soil Porewater DOM	Static Leaching (ER-H) and Passive Sampling (POM)	room temperature	4.7~8.63	Enell, A.; Lundstedt, S.; Arp, H. P. H.; Josefsson, S.; Cornelissen, G.; Wik, O.; Berggren Kleja, D. Combining Leaching and Passive Sampling To Measure the Mobility and Distribution between Porewater, DOC, and Colloids of Native Oxy-PAHs, N-PACs, and PAHs in Historically Contaminated Soil. Environmental Science & Technology 2016, 50 (21), 11797-11805. DOI: 10.1021/acs.est.6b02774.
000198-55-0	perylene	5.51	1	Sediment Porewater DOM	SPME			Hawthorne, S. B.; Grabanski, C. B.; Miller, D. J.; Kreitinger, J. P. Solid-Phase Microextraction Measurement of Parent and Alkyl Polycyclic Aromatic Hydrocarbons in Milliliter Sediment Pore Water Samples and Determination of KDOC Values. Environmental Science & Technology 2005, 39 (8), 2795-2803. DOI: 10.1021/es0405171.
000198-55-0	perylene	5.2	1	Sediment Porewater DOM	SPME			Hawthorne, S. B.; Grabanski, C. B.; Miller, D. J.; Kreitinger, J. P. Solid-Phase Microextraction Measurement of Parent and Alkyl Polycyclic Aromatic Hydrocarbons in Milliliter Sediment Pore Water Samples and Determination of KDOC Values. Environmental Science & Technology 2005, 39 (8), 2795-2803. DOI: 10.1021/es0405171.
000198-55-0	perylene	4.53	1	Sediment Porewater DOM	SPME			Hawthorne, S. B.; Grabanski, C. B.; Miller, D. J.; Kreitinger, J. P. Solid-Phase Microextraction Measurement of Parent and Alkyl Polycyclic Aromatic Hydrocarbons in Milliliter Sediment Pore Water Samples and Determination of KDOC Values. Environmental Science & Technology 2005, 39 (8), 2795-2803. DOI: 10.1021/es0405171.
000198-55-0	perylene	4.87	1	Sediment Porewater DOM	SPME			Hawthorne, S. B.; Grabanski, C. B.; Miller, D. J.; Kreitinger, J. P. Solid-Phase Microextraction Measurement of Parent and Alkyl Polycyclic Aromatic Hydrocarbons in Milliliter Sediment Pore Water Samples and Determination of KDOC Values. Environmental Science & Technology 2005, 39 (8), 2795-2803. DOI: 10.1021/es0405171.
000198-55-0	perylene	5.66	1	Surface Water HA	FQ		6	Mei, Y.; Wu, F.; Wang, L.; Bai, Y.; Li, W.; Liao, H. Binding characteristics of perylene, phenanthrene and anthracene to different DOM fractions from lake water. Journal of Environmental Sciences 2009, 21 (4), 414-423. DOI: https://doi.org/10.1016/S1001-0742(08)62285-8.
000198-55-0	perylene	4.83	1	Surface Water FA	FQ		6	Mei, Y.; Wu, F.; Wang, L.; Bai, Y.; Li, W.; Liao, H. Binding characteristics of perylene, phenanthrene and anthracene to different DOM fractions from lake water. Journal of Environmental Sciences 2009, 21 (4), 414-423. DOI: https://doi.org/10.1016/S1001-0742(08)62285-8.
000198-55-0	perylene	5.33	1	Surface Water HON	FQ		6	Mei, Y.; Wu, F.; Wang, L.; Bai, Y.; Li, W.; Liao, H. Binding characteristics of perylene, phenanthrene and anthracene to different DOM fractions from lake water. Journal of Environmental Sciences 2009, 21 (4), 414-423. DOI: https://doi.org/10.1016/S1001-0742(08)62285-8.
000198-55-0	perylene	5.2	1	Surface Water HIA	FQ		6	Mei, Y.; Wu, F.; Wang, L.; Bai, Y.; Li, W.; Liao, H. Binding characteristics of perylene, phenanthrene and anthracene to different DOM fractions from lake water. Journal of Environmental Sciences 2009, 21 (4), 414-423. DOI: https://doi.org/10.1016/S1001-0742(08)62285-8.
000198-55-0	perylene	5.03	1	Surface Water HIB	FQ		6	Mei, Y.; Wu, F.; Wang, L.; Bai, Y.; Li, W.; Liao, H. Binding characteristics of perylene, phenanthrene and anthracene to different DOM fractions from lake water. Journal of Environmental Sciences 2009, 21 (4), 414-423. DOI: https://doi.org/10.1016/S1001-0742(08)62285-8.
000198-55-0	perylene	4.86	1	Surface Water HIN	FQ		6	Mei, Y.; Wu, F.; Wang, L.; Bai, Y.; Li, W.; Liao, H. Binding characteristics of perylene, phenanthrene and anthracene to different DOM fractions from lake water. Journal of Environmental Sciences 2009, 21 (4), 414-423. DOI: https://doi.org/10.1016/S1001-0742(08)62285-8.
000198-55-0	perylene	5.981	1	Surface Water HA	FQ			Schlautman, M. A.; Morgan, J. J. Effects of aqueous chemistry on the binding of polycyclic aromatic hydrocarbons by dissolved humic materials. Environmental Science & Technology 1993, 27 (5), 961-969. DOI: 10.1021/es00042a020.
000198-55-0	perylene	5.826	1	Groundwater	FQ		7	Backhus, D. A.; Gschwend, P. M. Fluorescent polycyclic aromatic hydrocarbons as probes for studying the impact of colloids on pollutant transport in groundwater. Environmental Science & Technology 1990, 24 (8), 1214-1223. DOI: 10.1021/es00078a009.
000198-55-0	perylene	6.041	1	Groundwater	FQ		7	Backhus, D. A.; Gschwend, P. M. Fluorescent polycyclic aromatic hydrocarbons as probes for studying the impact of colloids on pollutant transport in groundwater. Environmental Science & Technology 1990, 24 (8), 1214-1223. DOI: 10.1021/es00078a009.
000198-55-0	perylene	5.94	2	Peat HA	FQ		6	Mei, Y.; Wu, F.; Wang, L.; Bai, Y.; Li, W.; Liao, H. Binding characteristics of perylene, phenanthrene and anthracene to different DOM fractions from lake water. Journal of Environmental Sciences 2009, 21 (4), 414-423. DOI: https://doi.org/10.1016/S1001-0742(08)62285-8.
000198-55-0	perylene	5.944	3	Aldrich HA	FQ		7	Backhus, D. A.; Gschwend, P. M. Fluorescent polycyclic aromatic hydrocarbons as probes for studying the impact of colloids on pollutant transport in groundwater. Environmental Science & Technology 1990, 24 (8), 1214-1223. DOI: 10.1021/es00078a009.
000198-55-0	perylene	6.23	3	Aldrich HA	FQ		7	Backhus, D. A.; Gschwend, P. M. Fluorescent polycyclic aromatic hydrocarbons as probes for studying the impact of colloids on pollutant transport in groundwater. Environmental Science & Technology 1990, 24 (8), 1214-1223. DOI: 10.1021/es00078a009.
000198-55-0	perylene	6.38	3	Aldrich HA	FQ		7	Backhus, D. A.; Gschwend, P. M. Fluorescent polycyclic aromatic hydrocarbons as probes for studying the impact of colloids on pollutant transport in groundwater. Environmental Science & Technology 1990, 24 (8), 1214-1223. DOI: 10.1021/es00078a009.
000205-99-2	Benzo(b)fluoranthene	6.22	2	Soil Porewater DOM	Static Leaching (ER-H) and Passive Sampling (POM)	room temperature	4.7~8.63	Enell, A.; Lundstedt, S.; Arp, H. P. H.; Josefsson, S.; Cornelissen, G.; Wik, O.; Berggren Kleja, D. Combining Leaching and Passive Sampling To Measure the Mobility and Distribution between Porewater, DOC, and Colloids of Native Oxy-PAHs, N-PACs, and PAHs in Historically Contaminated Soil. Environmental Science & Technology 2016, 50 (21), 11797-11805. DOI: 10.1021/acs.est.6b02774.
000205-99-2	benzo[b]fluoranthene	6.96	3	Aldrich HA	Solid Phase Dosing and Sampling	21	7.03~7.82	ter Laak, T. L.; Durjava, M.; Struijs, J.; Hermens, J. L. M. Solid Phase Dosing and Sampling Technique To Determine Partition Coefficients of Hydrophobic Chemicals in Complex Matrixes. Environmental Science & Technology 2005, 39 (10), 3736-3742. DOI: 10.1021/es048406p.
000206-44-0	fluoranthene	5.41	1	Sediment Porewater DOM	Passive sampling	20	7	Haftka, J. J. H.; Scherpenisse, P.; Jonker, M. T. O.; Hermens, J. L. M. Using Polyacrylate-Coated SPME Fibers To Quantify Sorption of Polar and Ionic Organic Contaminants to Dissolved Organic Carbon. Environmental Science & Technology 2013, 47 (9), 4455-4462. DOI: 10.1021/es400236a.
000206-44-0	fluoranthene	4.91	1	Sediment Porewater DOM	Passive sampling	3.2	7	Haftka, J. J. H.; Scherpenisse, P.; Jonker, M. T. O.; Hermens, J. L. M. Using Polyacrylate-Coated SPME Fibers To Quantify Sorption of Polar and Ionic Organic Contaminants to Dissolved Organic Carbon. Environmental Science & Technology 2013, 47 (9), 4455-4462. DOI: 10.1021/es400236a.
000206-44-0	fluoranthene	4.75	1	Sediment Porewater DOM	Passive sampling	20.1	7	Haftka, J. J. H.; Scherpenisse, P.; Jonker, M. T. O.; Hermens, J. L. M. Using Polyacrylate-Coated SPME Fibers To Quantify Sorption of Polar and Ionic Organic Contaminants to Dissolved Organic Carbon. Environmental Science & Technology 2013, 47 (9), 4455-4462. DOI: 10.1021/es400236a.
000206-44-0	fluoranthene	4.61	1	Sediment Porewater DOM	SPME			Hawthorne, S. B.; Grabanski, C. B.; Miller, D. J.; Kreitinger, J. P. Solid-Phase Microextraction Measurement of Parent and Alkyl Polycyclic Aromatic Hydrocarbons in Milliliter Sediment Pore Water Samples and Determination of KDOC Values. Environmental Science & Technology 2005, 39 (8), 2795-2803. DOI: 10.1021/es0405171.
000206-44-0	fluoranthene	4.14	1	Sediment Porewater DOM	SPME			Hawthorne, S. B.; Grabanski, C. B.; Miller, D. J.; Kreitinger, J. P. Solid-Phase Microextraction Measurement of Parent and Alkyl Polycyclic Aromatic Hydrocarbons in Milliliter Sediment Pore Water Samples and Determination of KDOC Values. Environmental Science & Technology 2005, 39 (8), 2795-2803. DOI: 10.1021/es0405171.
000206-44-0	fluoranthene	4.699	1	Surface Water HA	FQ			Perminova, I. V.; Grechishcheva, N. Y.; Petrosyan, V. S. Relationships between Structure and Binding Affinity of Humic Substances for Polycyclic Aromatic Hydrocarbons: Relevance of Molecular Descriptors. Environmental Science & Technology 1999, 33 (21), 3781-3787. DOI: 10.1021/es990056x.
000206-44-0	fluoranthene	4.301	1	Surface Water HA	FQ			Perminova, I. V.; Grechishcheva, N. Y.; Petrosyan, V. S. Relationships between Structure and Binding Affinity of Humic Substances for Polycyclic Aromatic Hydrocarbons: Relevance of Molecular Descriptors. Environmental Science & Technology 1999, 33 (21), 3781-3787. DOI: 10.1021/es990056x.
000206-44-0	fluoranthene	4.954	1	Surface Water HA	FQ			Perminova, I. V.; Grechishcheva, N. Y.; Petrosyan, V. S. Relationships between Structure and Binding Affinity of Humic Substances for Polycyclic Aromatic Hydrocarbons: Relevance of Molecular Descriptors. Environmental Science & Technology 1999, 33 (21), 3781-3787. DOI: 10.1021/es990056x.
000206-44-0	Fluoranthene	5.18	2	Soil Porewater DOM	Static Leaching (ER-H) and Passive Sampling (POM)	room temperature	4.7~8.63	Enell, A.; Lundstedt, S.; Arp, H. P. H.; Josefsson, S.; Cornelissen, G.; Wik, O.; Berggren Kleja, D. Combining Leaching and Passive Sampling To Measure the Mobility and Distribution between Porewater, DOC, and Colloids of Native Oxy-PAHs, N-PACs, and PAHs in Historically Contaminated Soil. Environmental Science & Technology 2016, 50 (21), 11797-11805. DOI: 10.1021/acs.est.6b02774.
000206-44-0	fluoranthene	4.93	2	Leonardite HA	CF-MA-HS-SPME			Hsieh, P.-C.; Lee, C.-L.; Jen, J.-F.; Chang, K.-C. Complexation-flocculation combined with microwave-assisted headspace solid-phase microextraction in determining the binding constants of hydrophobic organic pollutants to dissolved humic substances. Analyst 2014, 140. DOI: 10.1039/C4AN01923G.
000206-44-0	fluoranthene	4.964	2	Soil HA	FQ		7	Chen, S.; Inskeep, W. P.; Williams, S.; Callis, P. R. Fluorescence lifetime measurements of fluoranthene, 1-naphthol, and napropamide in the presence of dissolved humic Acid. Environmental science & technology 1994, 28 9, 1582-1588.
000206-44-0	fluoranthene	4.954	2	Soil HA	FQ			Perminova, I. V.; Grechishcheva, N. Y.; Petrosyan, V. S. Relationships between Structure and Binding Affinity of Humic Substances for Polycyclic Aromatic Hydrocarbons: Relevance of Molecular Descriptors. Environmental Science & Technology 1999, 33 (21), 3781-3787. DOI: 10.1021/es990056x.
000206-44-0	fluoranthene	4.954	2	Soil HA	FQ			Perminova, I. V.; Grechishcheva, N. Y.; Petrosyan, V. S. Relationships between Structure and Binding Affinity of Humic Substances for Polycyclic Aromatic Hydrocarbons: Relevance of Molecular Descriptors. Environmental Science & Technology 1999, 33 (21), 3781-3787. DOI: 10.1021/es990056x.
000206-44-0	fluoranthene	4.778	2	Soil HA	FQ			Perminova, I. V.; Grechishcheva, N. Y.; Petrosyan, V. S. Relationships between Structure and Binding Affinity of Humic Substances for Polycyclic Aromatic Hydrocarbons: Relevance of Molecular Descriptors. Environmental Science & Technology 1999, 33 (21), 3781-3787. DOI: 10.1021/es990056x.
000206-44-0	fluoranthene	4.845	2	Soil HA	FQ			Perminova, I. V.; Grechishcheva, N. Y.; Petrosyan, V. S. Relationships between Structure and Binding Affinity of Humic Substances for Polycyclic Aromatic Hydrocarbons: Relevance of Molecular Descriptors. Environmental Science & Technology 1999, 33 (21), 3781-3787. DOI: 10.1021/es990056x.
000206-44-0	fluoranthene	5.041	2	Soil HA	FQ			Perminova, I. V.; Grechishcheva, N. Y.; Petrosyan, V. S. Relationships between Structure and Binding Affinity of Humic Substances for Polycyclic Aromatic Hydrocarbons: Relevance of Molecular Descriptors. Environmental Science & Technology 1999, 33 (21), 3781-3787. DOI: 10.1021/es990056x.
000206-44-0	fluoranthene	4.954	2	Soil HA	FQ			Perminova, I. V.; Grechishcheva, N. Y.; Petrosyan, V. S. Relationships between Structure and Binding Affinity of Humic Substances for Polycyclic Aromatic Hydrocarbons: Relevance of Molecular Descriptors. Environmental Science & Technology 1999, 33 (21), 3781-3787. DOI: 10.1021/es990056x.
000206-44-0	fluoranthene	4.903	2	Soil HA	FQ			Perminova, I. V.; Grechishcheva, N. Y.; Petrosyan, V. S. Relationships between Structure and Binding Affinity of Humic Substances for Polycyclic Aromatic Hydrocarbons: Relevance of Molecular Descriptors. Environmental Science & Technology 1999, 33 (21), 3781-3787. DOI: 10.1021/es990056x.
000206-44-0	fluoranthene	4.903	2	Soil HA	FQ			Perminova, I. V.; Grechishcheva, N. Y.; Petrosyan, V. S. Relationships between Structure and Binding Affinity of Humic Substances for Polycyclic Aromatic Hydrocarbons: Relevance of Molecular Descriptors. Environmental Science & Technology 1999, 33 (21), 3781-3787. DOI: 10.1021/es990056x.
000206-44-0	fluoranthene	4.903	2	Soil HA	FQ			Perminova, I. V.; Grechishcheva, N. Y.; Petrosyan, V. S. Relationships between Structure and Binding Affinity of Humic Substances for Polycyclic Aromatic Hydrocarbons: Relevance of Molecular Descriptors. Environmental Science & Technology 1999, 33 (21), 3781-3787. DOI: 10.1021/es990056x.
000206-44-0	fluoranthene	4.903	2	Soil HA	FQ			Perminova, I. V.; Grechishcheva, N. Y.; Petrosyan, V. S. Relationships between Structure and Binding Affinity of Humic Substances for Polycyclic Aromatic Hydrocarbons: Relevance of Molecular Descriptors. Environmental Science & Technology 1999, 33 (21), 3781-3787. DOI: 10.1021/es990056x.
000206-44-0	fluoranthene	4.699	2	Soil HA	FQ			Perminova, I. V.; Grechishcheva, N. Y.; Petrosyan, V. S. Relationships between Structure and Binding Affinity of Humic Substances for Polycyclic Aromatic Hydrocarbons: Relevance of Molecular Descriptors. Environmental Science & Technology 1999, 33 (21), 3781-3787. DOI: 10.1021/es990056x.
000206-44-0	fluoranthene	4.954	2	Soil HA	FQ			Perminova, I. V.; Grechishcheva, N. Y.; Petrosyan, V. S. Relationships between Structure and Binding Affinity of Humic Substances for Polycyclic Aromatic Hydrocarbons: Relevance of Molecular Descriptors. Environmental Science & Technology 1999, 33 (21), 3781-3787. DOI: 10.1021/es990056x.
000206-44-0	fluoranthene	5.079	2	Soil HA	FQ			Perminova, I. V.; Grechishcheva, N. Y.; Petrosyan, V. S. Relationships between Structure and Binding Affinity of Humic Substances for Polycyclic Aromatic Hydrocarbons: Relevance of Molecular Descriptors. Environmental Science & Technology 1999, 33 (21), 3781-3787. DOI: 10.1021/es990056x.
000206-44-0	fluoranthene	5.114	2	Soil HA	FQ			Perminova, I. V.; Grechishcheva, N. Y.; Petrosyan, V. S. Relationships between Structure and Binding Affinity of Humic Substances for Polycyclic Aromatic Hydrocarbons: Relevance of Molecular Descriptors. Environmental Science & Technology 1999, 33 (21), 3781-3787. DOI: 10.1021/es990056x.
000206-44-0	fluoranthene	4.778	2	Soil HA+FA	FQ			Perminova, I. V.; Grechishcheva, N. Y.; Petrosyan, V. S. Relationships between Structure and Binding Affinity of Humic Substances for Polycyclic Aromatic Hydrocarbons: Relevance of Molecular Descriptors. Environmental Science & Technology 1999, 33 (21), 3781-3787. DOI: 10.1021/es990056x.
000206-44-0	fluoranthene	4.845	2	Soil FA	FQ			Perminova, I. V.; Grechishcheva, N. Y.; Petrosyan, V. S. Relationships between Structure and Binding Affinity of Humic Substances for Polycyclic Aromatic Hydrocarbons: Relevance of Molecular Descriptors. Environmental Science & Technology 1999, 33 (21), 3781-3787. DOI: 10.1021/es990056x.
000206-44-0	fluoranthene	5.5	3	Aldrich HA	Solid Phase Dosing and Sampling	21	7.03~7.82	ter Laak, T. L.; Durjava, M.; Struijs, J.; Hermens, J. L. M. Solid Phase Dosing and Sampling Technique To Determine Partition Coefficients of Hydrophobic Chemicals in Complex Matrixes. Environmental Science & Technology 2005, 39 (10), 3736-3742. DOI: 10.1021/es048406p.
000206-44-0	fluoranthene	5.11	3	Aldrich HA	Passive dosing	25	5.5~7	Kim, S.-J.; Kwon, J.-H. Determination of Partition Coefficients for Selected PAHs between Water and Dissolved Organic Matter. CLEAN – Soil, Air, Water 2010, 38, 797-802. DOI: 10.1002/clen.201000113.
000206-44-0	Fluoranthene	4.86	3	Roth HA	SPME	25	7	Georgi, A.; Kopinke, F. D. Validation of a modified Flory‐Huggins concept for description of hydrophobic organic compound sorption on dissolved humic substances. Environmental toxicology and chemistry 2002, 21 (9), 1766-1774. DOI: 10.1002/etc.5620210902 (acccessed 1/7/2025).
000206-44-0	Fluoranthene	4.529	3	Aldrich HA	nd-SPME	22	7	Smith, K. E. C.; Thullner, M.; Wick, L. Y.; Harms, H. Dissolved Organic Carbon Enhances the Mass Transfer of Hydrophobic Organic Compounds from Nonaqueous Phase Liquids (NAPLs) into the Aqueous Phase. Environmental Science & Technology 2011, 45 (20), 8741-8747. DOI: 10.1021/es202983k.
000206-44-0	Fluoranthene	4.732	3	Aldrich HA	nd-SPME	22	7	Smith, K. E. C.; Thullner, M.; Wick, L. Y.; Harms, H. Dissolved Organic Carbon Enhances the Mass Transfer of Hydrophobic Organic Compounds from Nonaqueous Phase Liquids (NAPLs) into the Aqueous Phase. Environmental Science & Technology 2011, 45 (20), 8741-8747. DOI: 10.1021/es202983k.
000206-44-0	fluoranthene	5.26	3	Aldrich HA	nd-SPME	room temperature		Hu, X.; Liu, J.; Mayer, P.; Jiang, G. Impacts of some environmentally relevant parameters on the sorption of polycyclic aromatic hydrocarbons to aqueous suspensions of fullerene. Environmental toxicology and chemistry 2008, 27 (9), 1868-1874. DOI: 10.1897/08-009.1 (acccessed 1/7/2025).
000206-44-0	fluoranthene	5.061	3	Aldrich HA	FQ	23	6	Laor, Y.; Rebhun, M. Evidence for Nonlinear Binding of PAHs to Dissolved Humic Acids. Environmental Science & Technology 2002, 36 (5), 955-961. DOI: 10.1021/es001996g.
000206-44-0	fluoranthene	5.255	3	Aldrich HA	FQ			Perminova, I. V.; Grechishcheva, N. Y.; Petrosyan, V. S. Relationships between Structure and Binding Affinity of Humic Substances for Polycyclic Aromatic Hydrocarbons: Relevance of Molecular Descriptors. Environmental Science & Technology 1999, 33 (21), 3781-3787. DOI: 10.1021/es990056x.
000206-44-0	fluoranthene	5.09	4	Sodium dodecyl sulfate micelle	Passive dosing	25	5.5~7	Kim, S.-J.; Kwon, J.-H. Determination of Partition Coefficients for Selected PAHs between Water and Dissolved Organic Matter. CLEAN – Soil, Air, Water 2010, 38, 797-802. DOI: 10.1002/clen.201000113.
000206-44-0	fluoranthene	3.21	4	2-hydroxypropyl-b-cyclodextrin	Passive dosing	25	5.5~7	Kim, S.-J.; Kwon, J.-H. Determination of Partition Coefficients for Selected PAHs between Water and Dissolved Organic Matter. CLEAN – Soil, Air, Water 2010, 38, 797-802. DOI: 10.1002/clen.201000113.
000207-08-9	Benzo(k)fluoranthene	6.47	2	Soil Porewater DOM	Static Leaching (ER-H) and Passive Sampling (POM)	room temperature	4.7~8.63	Enell, A.; Lundstedt, S.; Arp, H. P. H.; Josefsson, S.; Cornelissen, G.; Wik, O.; Berggren Kleja, D. Combining Leaching and Passive Sampling To Measure the Mobility and Distribution between Porewater, DOC, and Colloids of Native Oxy-PAHs, N-PACs, and PAHs in Historically Contaminated Soil. Environmental Science & Technology 2016, 50 (21), 11797-11805. DOI: 10.1021/acs.est.6b02774.
000208-96-8	Acenaphthylene	4.91	2	Soil Porewater DOM	Static Leaching (ER-H) and Passive Sampling (POM)	room temperature	4.7~8.63	Enell, A.; Lundstedt, S.; Arp, H. P. H.; Josefsson, S.; Cornelissen, G.; Wik, O.; Berggren Kleja, D. Combining Leaching and Passive Sampling To Measure the Mobility and Distribution between Porewater, DOC, and Colloids of Native Oxy-PAHs, N-PACs, and PAHs in Historically Contaminated Soil. Environmental Science & Technology 2016, 50 (21), 11797-11805. DOI: 10.1021/acs.est.6b02774.
000215-58-7	dibenzo[a,c]anthracene	7.24	3	Aldrich HA	Passive dosing	25	5.5~7	Kim, S.-J.; Kwon, J.-H. Determination of Partition Coefficients for Selected PAHs between Water and Dissolved Organic Matter. CLEAN – Soil, Air, Water 2010, 38, 797-802. DOI: 10.1002/clen.201000113.
000215-58-7	dibenzo[a,c]anthracene	5.88	4	Sodium dodecyl sulfate micelle	Passive dosing	25	5.5~7	Kim, S.-J.; Kwon, J.-H. Determination of Partition Coefficients for Selected PAHs between Water and Dissolved Organic Matter. CLEAN – Soil, Air, Water 2010, 38, 797-802. DOI: 10.1002/clen.201000113.
000218-01-9	chrysene	5.23	1	Sediment Porewater DOM	SPME			Hawthorne, S. B.; Grabanski, C. B.; Miller, D. J.; Kreitinger, J. P. Solid-Phase Microextraction Measurement of Parent and Alkyl Polycyclic Aromatic Hydrocarbons in Milliliter Sediment Pore Water Samples and Determination of KDOC Values. Environmental Science & Technology 2005, 39 (8), 2795-2803. DOI: 10.1021/es0405171.
000218-01-9	chrysene	5.01	1	Sediment Porewater DOM	SPME			Hawthorne, S. B.; Grabanski, C. B.; Miller, D. J.; Kreitinger, J. P. Solid-Phase Microextraction Measurement of Parent and Alkyl Polycyclic Aromatic Hydrocarbons in Milliliter Sediment Pore Water Samples and Determination of KDOC Values. Environmental Science & Technology 2005, 39 (8), 2795-2803. DOI: 10.1021/es0405171.
000218-01-9	chrysene	4.31	1	Sediment Porewater DOM	SPME			Hawthorne, S. B.; Grabanski, C. B.; Miller, D. J.; Kreitinger, J. P. Solid-Phase Microextraction Measurement of Parent and Alkyl Polycyclic Aromatic Hydrocarbons in Milliliter Sediment Pore Water Samples and Determination of KDOC Values. Environmental Science & Technology 2005, 39 (8), 2795-2803. DOI: 10.1021/es0405171.
000218-01-9	chrysene	4.27	1	Sediment Porewater DOM	SPME			Hawthorne, S. B.; Grabanski, C. B.; Miller, D. J.; Kreitinger, J. P. Solid-Phase Microextraction Measurement of Parent and Alkyl Polycyclic Aromatic Hydrocarbons in Milliliter Sediment Pore Water Samples and Determination of KDOC Values. Environmental Science & Technology 2005, 39 (8), 2795-2803. DOI: 10.1021/es0405171.
000218-01-9	Chrysene	5.75	2	Soil Porewater DOM	Static Leaching (ER-H) and Passive Sampling (POM)	room temperature	4.7~8.63	Enell, A.; Lundstedt, S.; Arp, H. P. H.; Josefsson, S.; Cornelissen, G.; Wik, O.; Berggren Kleja, D. Combining Leaching and Passive Sampling To Measure the Mobility and Distribution between Porewater, DOC, and Colloids of Native Oxy-PAHs, N-PACs, and PAHs in Historically Contaminated Soil. Environmental Science & Technology 2016, 50 (21), 11797-11805. DOI: 10.1021/acs.est.6b02774.
000218-01-9	chrysene	5.06	3	Roth HA	SPME		6	Poerschmann, J.; Kopinke, F.-D. Sorption of Very Hydrophobic Organic Compounds (VHOCs) on Dissolved Humic Organic Matter (DOM). 2. Measurement of Sorption and Application of a Flory−Huggins Concept To Interpret the Data †. Environmental science & technology 2001, 35, 1142-1148. DOI: 10.1021/es0017615.
000218-01-9	chrysene	5.91	3	Aldrich HA	nd-SPME	room temperature		Hu, X.; Liu, J.; Mayer, P.; Jiang, G. Impacts of some environmentally relevant parameters on the sorption of polycyclic aromatic hydrocarbons to aqueous suspensions of fullerene. Environmental toxicology and chemistry 2008, 27 (9), 1868-1874. DOI: 10.1897/08-009.1 (acccessed 1/7/2025).
000298-46-4	Carbamazepine	2.87	3	Aldrich HA	Passive dosing	25	7.8	Neale, P. A.; Antony, A.; Gernjak, W.; Leslie, G.; Escher, B. I. Natural versus wastewater derived dissolved organic carbon: Implications for the environmental fate of organic micropollutants. Water Research 2011, 45 (14), 4227-4237. DOI: https://doi.org/10.1016/j.watres.2011.05.038.
000309-00-2	Aldrin	5.14	3	Fluka HA	TECAM	20	7.5	Ke, R.; Wang, Z.; Huang, S.; Khan, S. U. Accurate quantification of freely dissolved organochlorine pesticides in water in the presence of dissolved organic matter using triolein-embedded cellulose acetate membrane. Analytical and Bioanalytical Chemistry 2007, 387 (8), 2871-2879. DOI: 10.1007/s00216-007-1174-6.
000319-84-6	α-HCH	3.22	3	Fluka HA	TECAM	20	7.5	Ke, R.; Wang, Z.; Huang, S.; Khan, S. U. Accurate quantification of freely dissolved organochlorine pesticides in water in the presence of dissolved organic matter using triolein-embedded cellulose acetate membrane. Analytical and Bioanalytical Chemistry 2007, 387 (8), 2871-2879. DOI: 10.1007/s00216-007-1174-6.
000319-85-7	β-HCH	3.29	3	Fluka HA	TECAM	20	7.5	Ke, R.; Wang, Z.; Huang, S.; Khan, S. U. Accurate quantification of freely dissolved organochlorine pesticides in water in the presence of dissolved organic matter using triolein-embedded cellulose acetate membrane. Analytical and Bioanalytical Chemistry 2007, 387 (8), 2871-2879. DOI: 10.1007/s00216-007-1174-6.
000319-86-8	γ-HCH	3.26	3	Fluka HA	TECAM	20	7.5	Ke, R.; Wang, Z.; Huang, S.; Khan, S. U. Accurate quantification of freely dissolved organochlorine pesticides in water in the presence of dissolved organic matter using triolein-embedded cellulose acetate membrane. Analytical and Bioanalytical Chemistry 2007, 387 (8), 2871-2879. DOI: 10.1007/s00216-007-1174-6.
000371-41-5	4-flurophenol	2.32	3	Aldrich HA	SPME		7.3	Ohlenbusch, G.; Frimmel, F. H. Investigations on the sorption of phenols to dissolved organic matter by a QSAR study. Chemosphere 2001, 45 (3), 323-327. DOI: https://doi.org/10.1016/S0045-6535(00)00588-9.
000479-79-8	Benzo(a)fluorenone	5.55	2	Soil Porewater DOM	Static Leaching (ER-H) and Passive Sampling (POM)	room temperature	4.7~8.63	Enell, A.; Lundstedt, S.; Arp, H. P. H.; Josefsson, S.; Cornelissen, G.; Wik, O.; Berggren Kleja, D. Combining Leaching and Passive Sampling To Measure the Mobility and Distribution between Porewater, DOC, and Colloids of Native Oxy-PAHs, N-PACs, and PAHs in Historically Contaminated Soil. Environmental Science & Technology 2016, 50 (21), 11797-11805. DOI: 10.1021/acs.est.6b02774.
000486-25-9	9-Fluorenone	3.84	2	Soil Porewater DOM	Static Leaching (ER-H) and Passive Sampling (POM)	room temperature	4.7~8.63	Enell, A.; Lundstedt, S.; Arp, H. P. H.; Josefsson, S.; Cornelissen, G.; Wik, O.; Berggren Kleja, D. Combining Leaching and Passive Sampling To Measure the Mobility and Distribution between Porewater, DOC, and Colloids of Native Oxy-PAHs, N-PACs, and PAHs in Historically Contaminated Soil. Environmental Science & Technology 2016, 50 (21), 11797-11805. DOI: 10.1021/acs.est.6b02774.
000527-20-8	pentachloroaniline	4.87	3	Aldrich HA	passive sampling	25	7	Freidig, A. P.; Garicano, E. A.; Busser, F. J. M.; Hermens, J. L. M. Estimating impact of humic acid on bioavailability and bioaccumulation of hydrophobic chemicals in guppies using kinetic solid‐phase extraction. Environmental toxicology and chemistry 1998, 17.
000527-60-6	2,4,6-trimethylphenol	2.29	3	Aldrich HA	SPME		7.3	Ohlenbusch, G.; Frimmel, F. H. Investigations on the sorption of phenols to dissolved organic matter by a QSAR study. Chemosphere 2001, 45 (3), 323-327. DOI: https://doi.org/10.1016/S0045-6535(00)00588-9.
000540-84-1	iso-octane	4.02	3	Roth HA	SPME	25	7	Georgi, A.; Kopinke, F. D. Validation of a modified Flory‐Huggins concept for description of hydrophobic organic compound sorption on dissolved humic substances. Environmental toxicology and chemistry 2002, 21 (9), 1766-1774. DOI: 10.1002/etc.5620210902 (acccessed 1/7/2025).
000563-04-2	Tri-3-cresyl phosphate	3.17	1	Surface Water HA	nd-SPME	room temperature	7	Pang, L.; Liu, J.; Yin, Y.; Shen, M. Evaluating the sorption of organophosphate esters to different sourced humic acids and its effects on the toxicity to Daphnia magna. Environmental toxicology and chemistry 2013, 32 (12), 2755-2761. DOI: 10.1002/etc.2360 (acccessed 1/7/2025).
000563-04-2	Tri-3-cresyl phosphate	4.54	2	Soil HA	nd-SPME	room temperature	7	Pang, L.; Liu, J.; Yin, Y.; Shen, M. Evaluating the sorption of organophosphate esters to different sourced humic acids and its effects on the toxicity to Daphnia magna. Environmental toxicology and chemistry 2013, 32 (12), 2755-2761. DOI: 10.1002/etc.2360 (acccessed 1/7/2025).
000563-04-2	Tri-3-cresyl phosphate	5.31	3	Aldrich HA	nd-SPME	room temperature	7	Pang, L.; Liu, J.; Yin, Y.; Shen, M. Evaluating the sorption of organophosphate esters to different sourced humic acids and its effects on the toxicity to Daphnia magna. Environmental toxicology and chemistry 2013, 32 (12), 2755-2761. DOI: 10.1002/etc.2360 (acccessed 1/7/2025).
000563-04-2	Tri-3-cresyl phosphate	5.01	3	Acros HA	nd-SPME	room temperature	7	Pang, L.; Liu, J.; Yin, Y.; Shen, M. Evaluating the sorption of organophosphate esters to different sourced humic acids and its effects on the toxicity to Daphnia magna. Environmental toxicology and chemistry 2013, 32 (12), 2755-2761. DOI: 10.1002/etc.2360 (acccessed 1/7/2025).
000575-37-1	1,7-dimethylnaphthalene	3.549	3	Aldrich HA	SPME	23	7.3~8.4	Van Stempvoort, D. R.; Lesage, S. Binding of methylated naphthalenes to concentrated aqueous humic acid. Advances in Environmental Research 2002, 6 (4), 495-504. DOI: https://doi.org/10.1016/S1093-0191(01)00076-4.
000575-41-7	1,3-dimethylnaphthalene	3.332	3	Aldrich HA	SPME	23	7.3~8.4	Van Stempvoort, D. R.; Lesage, S. Binding of methylated naphthalenes to concentrated aqueous humic acid. Advances in Environmental Research 2002, 6 (4), 495-504. DOI: https://doi.org/10.1016/S1093-0191(01)00076-4.
000575-41-7	1,3-dimethylnaphthalene	3.272	3	Aldrich HA	SPME	23	7.3~8.4	Van Stempvoort, D. R.; Lesage, S. Binding of methylated naphthalenes to concentrated aqueous humic acid. Advances in Environmental Research 2002, 6 (4), 495-504. DOI: https://doi.org/10.1016/S1093-0191(01)00076-4.
000575-41-7	1,3-dimethylnaphthalene	3.413	3	Aldrich HA	SPME	23	7.3~8.4	Van Stempvoort, D. R.; Lesage, S. Binding of methylated naphthalenes to concentrated aqueous humic acid. Advances in Environmental Research 2002, 6 (4), 495-504. DOI: https://doi.org/10.1016/S1093-0191(01)00076-4.
000575-41-7	1,3-dimethylnaphthalene	3.439	3	Aldrich HA	SPME	23	7.3~8.4	Van Stempvoort, D. R.; Lesage, S. Binding of methylated naphthalenes to concentrated aqueous humic acid. Advances in Environmental Research 2002, 6 (4), 495-504. DOI: https://doi.org/10.1016/S1093-0191(01)00076-4.
000608-93-5	pentachlorobenzene	4.5	3	Aldrich HA	nd-SPME		7	Urrestarazu Ramos, E.; Meijer, S. N.; Vaes, W. H. J.; Verhaar, H. J. M.; Hermens, J. L. M. Using Solid-Phase Microextraction To Determine Partition Coefficients to Humic Acids and Bioavailable Concentrations of Hydrophobic Chemicals. Environmental Science & Technology 1998, 32 (21), 3430-3435. DOI: 10.1021/es980274a.
000629-50-5	n-tridecane	6	3	Roth HA	SPME		6	Poerschmann 2001 EST Sorption of VHOCs on Dissolved Humic Organic (Endo,2012)
000634-90-2	1,2,3,5-Tetrachlorobenzene	4.35	3	Aldrich HA	passive sampling	25	7	Freidig, A. P.; Garicano, E. A.; Busser, F. J. M.; Hermens, J. L. M. Estimating impact of humic acid on bioavailability and bioaccumulation of hydrophobic chemicals in guppies using kinetic solid‐phase extraction. Environmental toxicology and chemistry 1998, 17.
000779-02-2	9-Methylanthracene	4.86	3	Roth HA	SPME	25	7	Georgi, A.; Kopinke, F. D. Validation of a modified Flory‐Huggins concept for description of hydrophobic organic compound sorption on dissolved humic substances. Environmental toxicology and chemistry 2002, 21 (9), 1766-1774. DOI: 10.1002/etc.5620210902 (acccessed 1/7/2025).
000886-50-0	Terbutryn	3.31	3	Aldrich HA	Passive dosing	25	7.8	Neale, P. A.; Antony, A.; Gernjak, W.; Leslie, G.; Escher, B. I. Natural versus wastewater derived dissolved organic carbon: Implications for the environmental fate of organic micropollutants. Water Research 2011, 45 (14), 4227-4237. DOI: https://doi.org/10.1016/j.watres.2011.05.038.
001024-57-3	Heptachlor epoxide	4.53	3	Fluka HA	TECAM	20	7.5	Ke, R.; Wang, Z.; Huang, S.; Khan, S. U. Accurate quantification of freely dissolved organochlorine pesticides in water in the presence of dissolved organic matter using triolein-embedded cellulose acetate membrane. Analytical and Bioanalytical Chemistry 2007, 387 (8), 2871-2879. DOI: 10.1007/s00216-007-1174-6.
001031-07-8	Endosulfan sulfate	3.44	3	Fluka HA	TECAM	20	7.5	Ke, R.; Wang, Z.; Huang, S.; Khan, S. U. Accurate quantification of freely dissolved organochlorine pesticides in water in the presence of dissolved organic matter using triolein-embedded cellulose acetate membrane. Analytical and Bioanalytical Chemistry 2007, 387 (8), 2871-2879. DOI: 10.1007/s00216-007-1174-6.
001067-98-7	Tri(chloropropyl) phosphate	3.88	1	Surface Water HA	nd-SPME	room temperature	7	Pang, L.; Liu, J.; Yin, Y.; Shen, M. Evaluating the sorption of organophosphate esters to different sourced humic acids and its effects on the toxicity to Daphnia magna. Environmental toxicology and chemistry 2013, 32 (12), 2755-2761. DOI: 10.1002/etc.2360 (acccessed 1/7/2025).
001067-98-7	Tri(chloropropyl) phosphate	3.73	2	Soil HA	nd-SPME	room temperature	7	Pang, L.; Liu, J.; Yin, Y.; Shen, M. Evaluating the sorption of organophosphate esters to different sourced humic acids and its effects on the toxicity to Daphnia magna. Environmental toxicology and chemistry 2013, 32 (12), 2755-2761. DOI: 10.1002/etc.2360 (acccessed 1/7/2025).
001067-98-7	Tri(chloropropyl) phosphate	3.48	3	Aldrich HA	nd-SPME	room temperature	7	Pang, L.; Liu, J.; Yin, Y.; Shen, M. Evaluating the sorption of organophosphate esters to different sourced humic acids and its effects on the toxicity to Daphnia magna. Environmental toxicology and chemistry 2013, 32 (12), 2755-2761. DOI: 10.1002/etc.2360 (acccessed 1/7/2025).
001067-98-7	Tri(chloropropyl) phosphate	3.81	3	Acros HA	nd-SPME	room temperature	7	Pang, L.; Liu, J.; Yin, Y.; Shen, M. Evaluating the sorption of organophosphate esters to different sourced humic acids and its effects on the toxicity to Daphnia magna. Environmental toxicology and chemistry 2013, 32 (12), 2755-2761. DOI: 10.1002/etc.2360 (acccessed 1/7/2025).
001120-21-4	n-undecane	5.2	3	Roth HA	SPME		6	Poerschmann, J.; Kopinke, F.-D. Sorption of Very Hydrophobic Organic Compounds (VHOCs) on Dissolved Humic Organic Matter (DOM). 2. Measurement of Sorption and Application of a Flory−Huggins Concept To Interpret the Data †. Environmental science & technology 2001, 35, 1142-1148. DOI: 10.1021/es0017615.
001120-21-4	n-undecane	5.58	3	Roth HA	SPME	25	7	Georgi, A.; Kopinke, F. D. Validation of a modified Flory‐Huggins concept for description of hydrophobic organic compound sorption on dissolved humic substances. Environmental toxicology and chemistry 2002, 21 (9), 1766-1774. DOI: 10.1002/etc.5620210902 (acccessed 1/7/2025).
001241-94-7	2-Ethylhexyl diphenyl phosphate	2.46	1	Surface Water HA	nd-SPME	room temperature	7	Pang, L.; Liu, J.; Yin, Y.; Shen, M. Evaluating the sorption of organophosphate esters to different sourced humic acids and its effects on the toxicity to Daphnia magna. Environmental toxicology and chemistry 2013, 32 (12), 2755-2761. DOI: 10.1002/etc.2360 (acccessed 1/7/2025).
001241-94-7	2-Ethylhexyl diphenyl phosphate	4.16	2	Soil HA	nd-SPME	room temperature	7	Pang, L.; Liu, J.; Yin, Y.; Shen, M. Evaluating the sorption of organophosphate esters to different sourced humic acids and its effects on the toxicity to Daphnia magna. Environmental toxicology and chemistry 2013, 32 (12), 2755-2761. DOI: 10.1002/etc.2360 (acccessed 1/7/2025).
001241-94-7	2-Ethylhexyl diphenyl phosphate	5.3	3	Aldrich HA	nd-SPME	room temperature	7	Pang, L.; Liu, J.; Yin, Y.; Shen, M. Evaluating the sorption of organophosphate esters to different sourced humic acids and its effects on the toxicity to Daphnia magna. Environmental toxicology and chemistry 2013, 32 (12), 2755-2761. DOI: 10.1002/etc.2360 (acccessed 1/7/2025).
001241-94-7	2-Ethylhexyl diphenyl phosphate	5.28	3	Acros HA	nd-SPME	room temperature	7	Pang, L.; Liu, J.; Yin, Y.; Shen, M. Evaluating the sorption of organophosphate esters to different sourced humic acids and its effects on the toxicity to Daphnia magna. Environmental toxicology and chemistry 2013, 32 (12), 2755-2761. DOI: 10.1002/etc.2360 (acccessed 1/7/2025).
001336-36-3	3,3′,4,4′,5,5′-hexachlorobiphenyl	5.37	1	Sediment Porewater DOM	SPME			Hawthorne, S. B.; Grabanski, C. B.; Miller, D. J. Solid-Phase-Microextraction Measurement of 62 Polychlorinated Biphenyl Congeners in Milliliter Sediment Pore Water Samples and Determination of KDOC Values. Analytical Chemistry 2009, 81 (16), 6936-6943. DOI: 10.1021/ac901001j.
001336-36-3	3,3′,4,4′,5,5′-hexachlorobiphenyl	5.5	1	Sediment Porewater DOM	SPME			Hawthorne, S. B.; Grabanski, C. B.; Miller, D. J. Solid-Phase-Microextraction Measurement of 62 Polychlorinated Biphenyl Congeners in Milliliter Sediment Pore Water Samples and Determination of KDOC Values. Analytical Chemistry 2009, 81 (16), 6936-6943. DOI: 10.1021/ac901001j.
002050-68-2	4,4'-dichlorobiphenyl	4.2	2	Soil HA	SPME		7	Prosen, H.; Fingler, S.; Zupančič-Kralj, L.; Drevenkar, V. Partitioning of selected environmental pollutants into organic matter as determined by solid-phase microextraction. Chemosphere 2007, 66 (8), 1580-1589. DOI: https://doi.org/10.1016/j.chemosphere.2006.08.006.
002050-68-2	4,4'-dichlorobiphenyl	4.4	2	Soil HA	SPME		7	Prosen, H.; Fingler, S.; Zupančič-Kralj, L.; Drevenkar, V. Partitioning of selected environmental pollutants into organic matter as determined by solid-phase microextraction. Chemosphere 2007, 66 (8), 1580-1589. DOI: https://doi.org/10.1016/j.chemosphere.2006.08.006.
002050-68-2	PCB 15	4.52	3	Roth HA	SPME		6	Poerschmann, J.; Kopinke, F.-D. Sorption of Very Hydrophobic Organic Compounds (VHOCs) on Dissolved Humic Organic Matter (DOM). 2. Measurement of Sorption and Application of a Flory−Huggins Concept To Interpret the Data †. Environmental science & technology 2001, 35, 1142-1148. DOI: 10.1021/es0017615.
002050-68-2	PCB 15	5.32	3	Aldrich HA	SPME	25	7.3	Xie, M.; Yang, Z.-Y.; Bao, L.-J.; Zeng, E. Y. Equilibrium and kinetic solid-phase microextraction determination of the partition coefficients between polychlorinated biphenyl congeners and dissolved humic acid. Journal of Chromatography A 2009, 1216 (21), 4553-4559. DOI: https://doi.org/10.1016/j.chroma.2009.03.075.
002050-68-2	PCB 15	5.45	3	Aldrich HA	SPME	25	7.3	Xie, M.; Yang, Z.-Y.; Bao, L.-J.; Zeng, E. Y. Equilibrium and kinetic solid-phase microextraction determination of the partition coefficients between polychlorinated biphenyl congeners and dissolved humic acid. Journal of Chromatography A 2009, 1216 (21), 4553-4559. DOI: https://doi.org/10.1016/j.chroma.2009.03.075.
002050-68-2	4,4'-dichlorbiphenyl	4.71	3	Roth HA	SPME	25	7	Georgi, A.; Kopinke, F. D. Validation of a modified Flory‐Huggins concept for description of hydrophobic organic compound sorption on dissolved humic substances. Environmental toxicology and chemistry 2002, 21 (9), 1766-1774. DOI: 10.1002/etc.5620210902 (acccessed 1/7/2025).
002050-68-2	4,4'-dichlorobiphenyl	4.3	3	Aldrich HA	SPME		7	Prosen, H.; Fingler, S.; Zupančič-Kralj, L.; Drevenkar, V. Partitioning of selected environmental pollutants into organic matter as determined by solid-phase microextraction. Chemosphere 2007, 66 (8), 1580-1589. DOI: https://doi.org/10.1016/j.chemosphere.2006.08.006.
002051-24-3	PCB 209	7.34	3	Aldrich HA	SPME	25	7.3	Xie, M.; Yang, Z.-Y.; Bao, L.-J.; Zeng, E. Y. Equilibrium and kinetic solid-phase microextraction determination of the partition coefficients between polychlorinated biphenyl congeners and dissolved humic acid. Journal of Chromatography A 2009, 1216 (21), 4553-4559. DOI: https://doi.org/10.1016/j.chroma.2009.03.075.
002051-24-3	PCB 209	7.29	3	Aldrich HA	SPME	25	7.3	Xie, M.; Yang, Z.-Y.; Bao, L.-J.; Zeng, E. Y. Equilibrium and kinetic solid-phase microextraction determination of the partition coefficients between polychlorinated biphenyl congeners and dissolved humic acid. Journal of Chromatography A 2009, 1216 (21), 4553-4559. DOI: https://doi.org/10.1016/j.chroma.2009.03.075.
002051-24-3	PCB 209	7.64	3	Aldrich HA	Passive dosing	25	6.95~7.05	Schacht, V. J.; Manning, M.; Grant, S. C.; Gaus, C.; Hawker, D. W. Simultaneous quantification of humic acid-water and silanized glass-water partition constants for PCBs, PCDDs and OCDF. Chemosphere 2020, 243, 125338. DOI: https://doi.org/10.1016/j.chemosphere.2019.125338.
002051-60-7	PCB 1	3.75	3	Roth HA	SPME		6	Poerschmann, J.; Kopinke, F.-D. Sorption of Very Hydrophobic Organic Compounds (VHOCs) on Dissolved Humic Organic Matter (DOM). 2. Measurement of Sorption and Application of a Flory−Huggins Concept To Interpret the Data †. Environmental science & technology 2001, 35, 1142-1148. DOI: 10.1021/es0017615.
002051-60-7	PCB 1	4.91	3	Aldrich HA	SPME	25	7.3	Xie, M.; Yang, Z.-Y.; Bao, L.-J.; Zeng, E. Y. Equilibrium and kinetic solid-phase microextraction determination of the partition coefficients between polychlorinated biphenyl congeners and dissolved humic acid. Journal of Chromatography A 2009, 1216 (21), 4553-4559. DOI: https://doi.org/10.1016/j.chroma.2009.03.075.
002051-60-7	PCB 1	5.02	3	Aldrich HA	SPME	25	7.3	Xie, M.; Yang, Z.-Y.; Bao, L.-J.; Zeng, E. Y. Equilibrium and kinetic solid-phase microextraction determination of the partition coefficients between polychlorinated biphenyl congeners and dissolved humic acid. Journal of Chromatography A 2009, 1216 (21), 4553-4559. DOI: https://doi.org/10.1016/j.chroma.2009.03.075.
002104-96-3	bromophos-methyl	3.87	1	Surface Water DOM	SPME	21	7.13	Haftka, J. J. H.; Scherpenisse, P.; Jonker, M. T. O.; Hermens, J. L. M. Using Polyacrylate-Coated SPME Fibers To Quantify Sorption of Polar and Ionic Organic Contaminants to Dissolved Organic Carbon. Environmental Science & Technology 2013, 47 (9), 4455-4462. DOI: 10.1021/es400236a.
002104-96-3	bromophos-methyl	3.98	2	Soil Porewater DOM	SPME	21	5.38	Haftka, J. J. H.; Scherpenisse, P.; Jonker, M. T. O.; Hermens, J. L. M. Using Polyacrylate-Coated SPME Fibers To Quantify Sorption of Polar and Ionic Organic Contaminants to Dissolved Organic Carbon. Environmental Science & Technology 2013, 47 (9), 4455-4462. DOI: 10.1021/es400236a.
002136-99-4	PCB 202	6.92	3	Aldrich HA	SPME	25	7.3	Xie, M.; Yang, Z.-Y.; Bao, L.-J.; Zeng, E. Y. Equilibrium and kinetic solid-phase microextraction determination of the partition coefficients between polychlorinated biphenyl congeners and dissolved humic acid. Journal of Chromatography A 2009, 1216 (21), 4553-4559. DOI: https://doi.org/10.1016/j.chroma.2009.03.075.
002136-99-4	PCB 202	6.86	3	Aldrich HA	SPME	25	7.3	Xie, M.; Yang, Z.-Y.; Bao, L.-J.; Zeng, E. Y. Equilibrium and kinetic solid-phase microextraction determination of the partition coefficients between polychlorinated biphenyl congeners and dissolved humic acid. Journal of Chromatography A 2009, 1216 (21), 4553-4559. DOI: https://doi.org/10.1016/j.chroma.2009.03.075.
002245-38-7	2,3,5-trimethylnaphthalene	3.598	3	Aldrich HA	SPME	23	7.3~8.4	Van Stempvoort, D. R.; Lesage, S. Binding of methylated naphthalenes to concentrated aqueous humic acid. Advances in Environmental Research 2002, 6 (4), 495-504. DOI: https://doi.org/10.1016/S1093-0191(01)00076-4.
002245-38-7	2,3,5-trimethylnaphthalene	3.534	3	Aldrich HA	SPME	23	7.3~8.4	Van Stempvoort, D. R.; Lesage, S. Binding of methylated naphthalenes to concentrated aqueous humic acid. Advances in Environmental Research 2002, 6 (4), 495-504. DOI: https://doi.org/10.1016/S1093-0191(01)00076-4.
002245-38-7	2,3,5-trimethylnaphthalene	3.63	3	Aldrich HA	SPME	23	7.3~8.4	Van Stempvoort, D. R.; Lesage, S. Binding of methylated naphthalenes to concentrated aqueous humic acid. Advances in Environmental Research 2002, 6 (4), 495-504. DOI: https://doi.org/10.1016/S1093-0191(01)00076-4.
002245-38-7	2,3,5-trimethylnaphthalene	3.684	3	Aldrich HA	SPME	23	7.3~8.4	Van Stempvoort, D. R.; Lesage, S. Binding of methylated naphthalenes to concentrated aqueous humic acid. Advances in Environmental Research 2002, 6 (4), 495-504. DOI: https://doi.org/10.1016/S1093-0191(01)00076-4.
002531-84-2	2-Methylphenanthrene	4.59	3	Roth HA	SPME	25	7	Georgi, A.; Kopinke, F. D. Validation of a modified Flory‐Huggins concept for description of hydrophobic organic compound sorption on dissolved humic substances. Environmental toxicology and chemistry 2002, 21 (9), 1766-1774. DOI: 10.1002/etc.5620210902 (acccessed 1/7/2025).
002921-88-2	Chlorpyrifos	4.36	3	Aldrich HA	Passive dosing	25	7.8	Neale, P. A.; Antony, A.; Gernjak, W.; Leslie, G.; Escher, B. I. Natural versus wastewater derived dissolved organic carbon: Implications for the environmental fate of organic micropollutants. Water Research 2011, 45 (14), 4227-4237. DOI: https://doi.org/10.1016/j.watres.2011.05.038.
003074-00-8	6H-Benzo(cd)pyren-6-one	6	2	Soil Porewater DOM	Static Leaching (ER-H) and Passive Sampling (POM)	room temperature	4.7~8.63	Enell, A.; Lundstedt, S.; Arp, H. P. H.; Josefsson, S.; Cornelissen, G.; Wik, O.; Berggren Kleja, D. Combining Leaching and Passive Sampling To Measure the Mobility and Distribution between Porewater, DOC, and Colloids of Native Oxy-PAHs, N-PACs, and PAHs in Historically Contaminated Soil. Environmental Science & Technology 2016, 50 (21), 11797-11805. DOI: 10.1021/acs.est.6b02774.
003268-87-9	OCDD	6.3	2	Soil Porewater DOM	LLE	20	6.8~9.1	Frankki, S.; Persson, Y.; Tysklind, M.; Skyllberg, U. Partitioning of CPs, PCDEs, and PCDD/Fs between Particulate and Experimentally Enhanced Dissolved Natural Organic Matter in a Contaminated Soil. Environmental Science & Technology 2006, 40 (21), 6668-6673. DOI: 10.1021/es0608850.
003268-87-9	OCDD	7.93	3	Aldrich HA	Passive dosing	25	6.95~7.05	Schacht, V. J.; Manning, M.; Grant, S. C.; Gaus, C.; Hawker, D. W. Simultaneous quantification of humic acid-water and silanized glass-water partition constants for PCBs, PCDDs and OCDF. Chemosphere 2020, 243, 125338. DOI: https://doi.org/10.1016/j.chemosphere.2019.125338.
003380-34-5	triclosan	3.89	2	Soil Porewater DOM	SPME	21	5.38	Haftka, J. J. H.; Scherpenisse, P.; Jonker, M. T. O.; Hermens, J. L. M. Using Polyacrylate-Coated SPME Fibers To Quantify Sorption of Polar and Ionic Organic Contaminants to Dissolved Organic Carbon. Environmental Science & Technology 2013, 47 (9), 4455-4462. DOI: 10.1021/es400236a.
005103-71-9	α-Chlordane	5.17	3	Fluka HA	TECAM	20	7.5	Ke, R.; Wang, Z.; Huang, S.; Khan, S. U. Accurate quantification of freely dissolved organochlorine pesticides in water in the presence of dissolved organic matter using triolein-embedded cellulose acetate membrane. Analytical and Bioanalytical Chemistry 2007, 387 (8), 2871-2879. DOI: 10.1007/s00216-007-1174-6.
005103-74-2	γ-Chlordane	5.14	3	Fluka HA	TECAM	20	7.5	Ke, R.; Wang, Z.; Huang, S.; Khan, S. U. Accurate quantification of freely dissolved organochlorine pesticides in water in the presence of dissolved organic matter using triolein-embedded cellulose acetate membrane. Analytical and Bioanalytical Chemistry 2007, 387 (8), 2871-2879. DOI: 10.1007/s00216-007-1174-6.
005436-43-1	2,2′,4,4′-tetrabromodiphenyl ether	5.48	1	Surface Water DOM	POM-SPE-C14	20	7	Kuivikko, M.; Sorsa, K.; Kukkonen, J. V. K.; Akkanen, J.; Kotiaho, T.; Vähätalo, A. V. Partitioning of tetra- and pentabromo diphenyl ether and benzo[a]pyrene among water and dissolved and particulate organic carbon along a salinity gradient in coastal waters. Environmental toxicology and chemistry 2010, 29 (11), 2443-2449. DOI: 10.1002/etc.308 PubMed.
005436-43-1	2,2′,4,4′-tetrabromodiphenyl ether	5.69	1	Surface Water DOM	POM-SPE-C12	20	7	Kuivikko, M.; Sorsa, K.; Kukkonen, J. V. K.; Akkanen, J.; Kotiaho, T.; Vähätalo, A. V. Partitioning of tetra- and pentabromo diphenyl ether and benzo[a]pyrene among water and dissolved and particulate organic carbon along a salinity gradient in coastal waters. Environmental toxicology and chemistry 2010, 29 (11), 2443-2449. DOI: 10.1002/etc.308 PubMed.
005436-43-1	BDE-47	6.19	1	Sediment Porewater DOM	SPME	room temperature		Wang, W.; Delgado-Moreno, L.; Ye, Q.; Gan, J. Improved Measurements of Partition Coefficients for Polybrominated Diphenyl Ethers. Environmental Science & Technology 2011, 45 (4), 1521-1527. DOI: 10.1021/es103087a.
005436-43-1	BDE-47	5.48	1	Sediment Porewater DOM	SPME	room temperature		Wang, W.; Delgado-Moreno, L.; Ye, Q.; Gan, J. Improved Measurements of Partition Coefficients for Polybrominated Diphenyl Ethers. Environmental Science & Technology 2011, 45 (4), 1521-1527. DOI: 10.1021/es103087a.
005436-43-1	BDE-47	5.48	1	Sediment Porewater DOM	SPME	room temperature		Wang, W.; Delgado-Moreno, L.; Ye, Q.; Gan, J. Improved Measurements of Partition Coefficients for Polybrominated Diphenyl Ethers. Environmental Science & Technology 2011, 45 (4), 1521-1527. DOI: 10.1021/es103087a.
005436-43-1	BDE-47	5.81	1	Sediment Porewater DOM	SPME	room temperature		Wang, W.; Delgado-Moreno, L.; Ye, Q.; Gan, J. Improved Measurements of Partition Coefficients for Polybrominated Diphenyl Ethers. Environmental Science & Technology 2011, 45 (4), 1521-1527. DOI: 10.1021/es103087a.
005436-43-1	BDE-47	5.86	1	Surface Water DOM	Passive sampling	20		Khairy, M. A.; Lohmann, R. Using Polyethylene Passive Samplers To Study the Partitioning and Fluxes of Polybrominated Diphenyl Ethers in an Urban River. Environmental Science & Technology 2017, 51 (16), 9062-9071. DOI: 10.1021/acs.est.7b02418.
005436-43-1	2,2′,4,4′-tetrabromodiphenyl ether	6.12	3	Aldrich HA	Solid Phase Dosing and Sampling	20	7.03~7.06	ter Laak, T. L.; van Eijkeren, J. C. H.; Busser, F. J. M.; van Leeuwen, H. P.; Hermens, J. L. M. Facilitated Transport of Polychlorinated Biphenyls and Polybrominated Diphenyl Ethers by Dissolved Organic Matter. Environmental Science & Technology 2009, 43 (5), 1379-1385. DOI: 10.1021/es802403v.
005466-77-3	octyl methoxycinnamate	5.48	1	Sediment Porewater DOM	TFME	25	7	Ahmadi, F.; Sparham, C.; Pawliszyn, J. A flow-through aqueous standard generation system for thin film microextraction investigations of UV filters and biocides partitioning to different environmental compartments. Environmental Pollution 2017, 230, 663-673. DOI: https://doi.org/10.1016/j.envpol.2017.06.092.
005466-77-3	octyl methoxycinnamate	5.72	3	Aldrich HA	TFME	25	7	Ahmadi, F.; Sparham, C.; Pawliszyn, J. A flow-through aqueous standard generation system for thin film microextraction investigations of UV filters and biocides partitioning to different environmental compartments. Environmental Pollution 2017, 230, 663-673. DOI: https://doi.org/10.1016/j.envpol.2017.06.092.
005737-13-3	4H-Cyclopenta(def)Phenanthrenone	4.55	2	Soil Porewater DOM	Static Leaching (ER-H) and Passive Sampling (POM)	room temperature	4.7~8.63	Enell, A.; Lundstedt, S.; Arp, H. P. H.; Josefsson, S.; Cornelissen, G.; Wik, O.; Berggren Kleja, D. Combining Leaching and Passive Sampling To Measure the Mobility and Distribution between Porewater, DOC, and Colloids of Native Oxy-PAHs, N-PACs, and PAHs in Historically Contaminated Soil. Environmental Science & Technology 2016, 50 (21), 11797-11805. DOI: 10.1021/acs.est.6b02774.
006197-30-4	octocrylene	5.72	1	Sediment Porewater DOM	TFME	25	7	Ahmadi, F.; Sparham, C.; Pawliszyn, J. A flow-through aqueous standard generation system for thin film microextraction investigations of UV filters and biocides partitioning to different environmental compartments. Environmental Pollution 2017, 230, 663-673. DOI: https://doi.org/10.1016/j.envpol.2017.06.092.
006197-30-4	octocrylene	4.78	1	Surface Water DOM	SPME	21	5.3	Haftka, J. J. H.; Scherpenisse, P.; Jonker, M. T. O.; Hermens, J. L. M. Using Polyacrylate-Coated SPME Fibers To Quantify Sorption of Polar and Ionic Organic Contaminants to Dissolved Organic Carbon. Environmental Science & Technology 2013, 47 (9), 4455-4462. DOI: 10.1021/es400236a.
006197-30-4	octocrylene	4.99	1	Surface Water DOM	SPME	21	6.12	Haftka, J. J. H.; Scherpenisse, P.; Jonker, M. T. O.; Hermens, J. L. M. Using Polyacrylate-Coated SPME Fibers To Quantify Sorption of Polar and Ionic Organic Contaminants to Dissolved Organic Carbon. Environmental Science & Technology 2013, 47 (9), 4455-4462. DOI: 10.1021/es400236a.
006197-30-4	octocrylene	5.23	1	Surface Water DOM	SPME	21	6.32	Haftka, J. J. H.; Scherpenisse, P.; Jonker, M. T. O.; Hermens, J. L. M. Using Polyacrylate-Coated SPME Fibers To Quantify Sorption of Polar and Ionic Organic Contaminants to Dissolved Organic Carbon. Environmental Science & Technology 2013, 47 (9), 4455-4462. DOI: 10.1021/es400236a.
006197-30-4	octocrylene	5.55	1	Surface Water DOM	SPME	21	6.93	Haftka, J. J. H.; Scherpenisse, P.; Jonker, M. T. O.; Hermens, J. L. M. Using Polyacrylate-Coated SPME Fibers To Quantify Sorption of Polar and Ionic Organic Contaminants to Dissolved Organic Carbon. Environmental Science & Technology 2013, 47 (9), 4455-4462. DOI: 10.1021/es400236a.
006197-30-4	octocrylene	5.02	1	Surface Water DOM	SPME	21	6.94	Haftka, J. J. H.; Scherpenisse, P.; Jonker, M. T. O.; Hermens, J. L. M. Using Polyacrylate-Coated SPME Fibers To Quantify Sorption of Polar and Ionic Organic Contaminants to Dissolved Organic Carbon. Environmental Science & Technology 2013, 47 (9), 4455-4462. DOI: 10.1021/es400236a.
006197-30-4	octocrylene	5.15	1	Surface Water DOM	SPME	21	7.13	Haftka, J. J. H.; Scherpenisse, P.; Jonker, M. T. O.; Hermens, J. L. M. Using Polyacrylate-Coated SPME Fibers To Quantify Sorption of Polar and Ionic Organic Contaminants to Dissolved Organic Carbon. Environmental Science & Technology 2013, 47 (9), 4455-4462. DOI: 10.1021/es400236a.
006197-30-4	octocrylene	5.52	2	Soil Porewater DOM	SPME	21	5.38	Haftka, J. J. H.; Scherpenisse, P.; Jonker, M. T. O.; Hermens, J. L. M. Using Polyacrylate-Coated SPME Fibers To Quantify Sorption of Polar and Ionic Organic Contaminants to Dissolved Organic Carbon. Environmental Science & Technology 2013, 47 (9), 4455-4462. DOI: 10.1021/es400236a.
006197-30-4	octocrylene	5.61	3	Aldrich HA	TFME	25	7	Ahmadi, F.; Sparham, C.; Pawliszyn, J. A flow-through aqueous standard generation system for thin film microextraction investigations of UV filters and biocides partitioning to different environmental compartments. Environmental Pollution 2017, 230, 663-673. DOI: https://doi.org/10.1016/j.envpol.2017.06.092.
006876-00-2	BDE-2	4.06	1	Surface Water DOM	Passive sampling	20		Khairy, M. A.; Lohmann, R. Using Polyethylene Passive Samplers To Study the Partitioning and Fluxes of Polybrominated Diphenyl Ethers in an Urban River. Environmental Science & Technology 2017, 51 (16), 9062-9071. DOI: 10.1021/acs.est.7b02418.
007012-37-5	PCB 28	5.11	3	Aldrich HA	Solid Phase Dosing and Sampling	20	7.03~7.06	ter Laak, T. L.; van Eijkeren, J. C. H.; Busser, F. J. M.; van Leeuwen, H. P.; Hermens, J. L. M. Facilitated Transport of Polychlorinated Biphenyls and Polybrominated Diphenyl Ethers by Dissolved Organic Matter. Environmental Science & Technology 2009, 43 (5), 1379-1385. DOI: 10.1021/es802403v.
007012-37-5	PCB 28	4.72	3	Roth HA	SPME		6	Poerschmann, J.; Kopinke, F.-D. Sorption of Very Hydrophobic Organic Compounds (VHOCs) on Dissolved Humic Organic Matter (DOM). 2. Measurement of Sorption and Application of a Flory−Huggins Concept To Interpret the Data †. Environmental science & technology 2001, 35, 1142-1148. DOI: 10.1021/es0017615.
007012-37-5	PCB 28	5.83	3	Aldrich HA	Solid Phase Dosing and Sampling	21	NA	Durjava, M. K.; ter Laak, T. L.; Hermens, J. L. M.; Struijs, J. Distribution of PAHs and PCBs to dissolved organic matter: High distribution coefficients with consequences for environmental fate modeling. Chemosphere 2007, 67 (5), 990-997. DOI: https://doi.org/10.1016/j.chemosphere.2006.10.059.
007012-37-5	PCB 28	5.67	3	Aldrich HA	SPME	25	7.3	Xie, M.; Yang, Z.-Y.; Bao, L.-J.; Zeng, E. Y. Equilibrium and kinetic solid-phase microextraction determination of the partition coefficients between polychlorinated biphenyl congeners and dissolved humic acid. Journal of Chromatography A 2009, 1216 (21), 4553-4559. DOI: https://doi.org/10.1016/j.chroma.2009.03.075.
007012-37-5	PCB 28	5.67	3	Aldrich HA	SPME	25	7.3	Xie, M.; Yang, Z.-Y.; Bao, L.-J.; Zeng, E. Y. Equilibrium and kinetic solid-phase microextraction determination of the partition coefficients between polychlorinated biphenyl congeners and dissolved humic acid. Journal of Chromatography A 2009, 1216 (21), 4553-4559. DOI: https://doi.org/10.1016/j.chroma.2009.03.075.
013171-00-1	ADBI	3.38	3	Aldrich HA	SPME	20	7.12~7.89	Böhm, L.; Düring, R.-A. Partitioning of polycyclic musk compounds in soil and aquatic environment—experimental determination of KDOC. Journal of Soils and Sediments 2010, 10, 708-713.
015299-99-7	napropamide	4.362	2	Soil HA	FQ		7	Chen, S.; Inskeep, W. P.; Williams, S.; Callis, P. R. Fluorescence lifetime measurements of fluoranthene, 1-naphthol, and napropamide in the presence of dissolved humic Acid. Environmental science & technology 1994, 28 9, 1582-1588.
015323-35-0	AHDI	3.32	3	Aldrich HA	SPME	20	7.12~7.89	Böhm, L.; Düring, R.-A. Partitioning of polycyclic musk compounds in soil and aquatic environment—experimental determination of KDOC. Journal of Soils and Sediments 2010, 10, 708-713.
019408-74-3	123789-HxCDD	5.6	2	Soil Porewater DOM	LLE	20	6.8~9.1	Frankki, S.; Persson, Y.; Tysklind, M.; Skyllberg, U. Partitioning of CPs, PCDEs, and PCDD/Fs between Particulate and Experimentally Enhanced Dissolved Natural Organic Matter in a Contaminated Soil. Environmental Science & Technology 2006, 40 (21), 6668-6673. DOI: 10.1021/es0608850.
021145-77-7	AHTN	3.58	3	Aldrich HA	SPME	20	7.12~7.89	Böhm, L.; Düring, R.-A. Partitioning of polycyclic musk compounds in soil and aquatic environment—experimental determination of KDOC. Journal of Soils and Sediments 2010, 10, 708-713.
028159-98-0	Irgarol	3.21	3	Aldrich HA	Passive dosing	25	7.8	Neale, P. A.; Antony, A.; Gernjak, W.; Leslie, G.; Escher, B. I. Natural versus wastewater derived dissolved organic carbon: Implications for the environmental fate of organic micropollutants. Water Research 2011, 45 (14), 4227-4237. DOI: https://doi.org/10.1016/j.watres.2011.05.038.
031508-00-6	PCB 118	6.28	3	Aldrich HA	Solid Phase Dosing and Sampling	20	7.03~7.06	ter Laak, T. L.; van Eijkeren, J. C. H.; Busser, F. J. M.; van Leeuwen, H. P.; Hermens, J. L. M. Facilitated Transport of Polychlorinated Biphenyls and Polybrominated Diphenyl Ethers by Dissolved Organic Matter. Environmental Science & Technology 2009, 43 (5), 1379-1385. DOI: 10.1021/es802403v.
031508-00-6	PCB 118	5.97	3	Roth HA	SPME		6	Poerschmann, J.; Kopinke, F.-D. Sorption of Very Hydrophobic Organic Compounds (VHOCs) on Dissolved Humic Organic Matter (DOM). 2. Measurement of Sorption and Application of a Flory−Huggins Concept To Interpret the Data †. Environmental science & technology 2001, 35, 1142-1148. DOI: 10.1021/es0017615.
031508-00-6	PCB 118	6.7	3	Aldrich HA	Solid Phase Dosing and Sampling	21	NA	Durjava, M. K.; ter Laak, T. L.; Hermens, J. L. M.; Struijs, J. Distribution of PAHs and PCBs to dissolved organic matter: High distribution coefficients with consequences for environmental fate modeling. Chemosphere 2007, 67 (5), 990-997. DOI: https://doi.org/10.1016/j.chemosphere.2006.10.059.
032598-13-3	PCB 77	5.94	3	Aldrich HA	Solid Phase Dosing and Sampling	20	7.03~7.06	ter Laak, T. L.; van Eijkeren, J. C. H.; Busser, F. J. M.; van Leeuwen, H. P.; Hermens, J. L. M. Facilitated Transport of Polychlorinated Biphenyls and Polybrominated Diphenyl Ethers by Dissolved Organic Matter. Environmental Science & Technology 2009, 43 (5), 1379-1385. DOI: 10.1021/es802403v.
032598-13-3	3,3',4,4'-tetrachlorobiphenyl	5.97	3	Aldrich HA	nd-SPME		7	Urrestarazu Ramos, E.; Meijer, S. N.; Vaes, W. H. J.; Verhaar, H. J. M.; Hermens, J. L. M. Using Solid-Phase Microextraction To Determine Partition Coefficients to Humic Acids and Bioavailable Concentrations of Hydrophobic Chemicals. Environmental Science & Technology 1998, 32 (21), 3430-3435. DOI: 10.1021/es980274a.
033284-54-7	2,3,5,6-tetrachlorobiphenyl	4.56	1	Sediment Porewater DOM	SPME			Hawthorne, S. B.; Grabanski, C. B.; Miller, D. J. Solid-Phase-Microextraction Measurement of 62 Polychlorinated Biphenyl Congeners in Milliliter Sediment Pore Water Samples and Determination of KDOC Values. Analytical Chemistry 2009, 81 (16), 6936-6943. DOI: 10.1021/ac901001j.
033284-54-7	2,3,5,6-tetrachlorobiphenyl	4.09	1	Sediment Porewater DOM	SPME			Hawthorne, S. B.; Grabanski, C. B.; Miller, D. J. Solid-Phase-Microextraction Measurement of 62 Polychlorinated Biphenyl Congeners in Milliliter Sediment Pore Water Samples and Determination of KDOC Values. Analytical Chemistry 2009, 81 (16), 6936-6943. DOI: 10.1021/ac901001j.
033284-54-7	2,3,5,6-tetrachlorobiphenyl	4.36	1	Sediment Porewater DOM	SPME			Hawthorne, S. B.; Grabanski, C. B.; Miller, D. J. Solid-Phase-Microextraction Measurement of 62 Polychlorinated Biphenyl Congeners in Milliliter Sediment Pore Water Samples and Determination of KDOC Values. Analytical Chemistry 2009, 81 (16), 6936-6943. DOI: 10.1021/ac901001j.
034883-41-5	PCB 14	4.76	3	Aldrich HA	Solid Phase Dosing and Sampling	20	7.03~7.06	ter Laak, T. L.; van Eijkeren, J. C. H.; Busser, F. J. M.; van Leeuwen, H. P.; Hermens, J. L. M. Facilitated Transport of Polychlorinated Biphenyls and Polybrominated Diphenyl Ethers by Dissolved Organic Matter. Environmental Science & Technology 2009, 43 (5), 1379-1385. DOI: 10.1021/es802403v.
035065-27-1	PCB 153	6.33	3	Aldrich HA	Solid Phase Dosing and Sampling	20	7.03~7.06	ter Laak, T. L.; van Eijkeren, J. C. H.; Busser, F. J. M.; van Leeuwen, H. P.; Hermens, J. L. M. Facilitated Transport of Polychlorinated Biphenyls and Polybrominated Diphenyl Ethers by Dissolved Organic Matter. Environmental Science & Technology 2009, 43 (5), 1379-1385. DOI: 10.1021/es802403v.
035065-27-1	PCB 153	6.06	3	Roth HA	SPME		6	Poerschmann, J.; Kopinke, F.-D. Sorption of Very Hydrophobic Organic Compounds (VHOCs) on Dissolved Humic Organic Matter (DOM). 2. Measurement of Sorption and Application of a Flory−Huggins Concept To Interpret the Data †. Environmental science & technology 2001, 35, 1142-1148. DOI: 10.1021/es0017615.
035065-27-1	PCB 153	6.88	3	Aldrich HA	Solid Phase Dosing and Sampling	21	NA	Durjava, M. K.; ter Laak, T. L.; Hermens, J. L. M.; Struijs, J. Distribution of PAHs and PCBs to dissolved organic matter: High distribution coefficients with consequences for environmental fate modeling. Chemosphere 2007, 67 (5), 990-997. DOI: https://doi.org/10.1016/j.chemosphere.2006.10.059.
035065-28-2	2,2',3,4,4',5'-hexachlorobiphenyl	4.7	2	Soil HA	SPME		7	Prosen, H.; Fingler, S.; Zupančič-Kralj, L.; Drevenkar, V. Partitioning of selected environmental pollutants into organic matter as determined by solid-phase microextraction. Chemosphere 2007, 66 (8), 1580-1589. DOI: https://doi.org/10.1016/j.chemosphere.2006.08.006.
035065-28-2	2,2',3,4,4',5'-hexachlorobiphenyl	4.8	2	Soil HA	SPME		7	Prosen, H.; Fingler, S.; Zupančič-Kralj, L.; Drevenkar, V. Partitioning of selected environmental pollutants into organic matter as determined by solid-phase microextraction. Chemosphere 2007, 66 (8), 1580-1589. DOI: https://doi.org/10.1016/j.chemosphere.2006.08.006.
035065-28-2	PCB 138	7.02	3	Aldrich HA	Solid Phase Dosing and Sampling	21	NA	Durjava, M. K.; ter Laak, T. L.; Hermens, J. L. M.; Struijs, J. Distribution of PAHs and PCBs to dissolved organic matter: High distribution coefficients with consequences for environmental fate modeling. Chemosphere 2007, 67 (5), 990-997. DOI: https://doi.org/10.1016/j.chemosphere.2006.10.059.
035065-28-2	2,2',3,4,4',5'-hexachlorobiphenyl	4.6	3	Aldrich HA	SPME		7	Prosen, H.; Fingler, S.; Zupančič-Kralj, L.; Drevenkar, V. Partitioning of selected environmental pollutants into organic matter as determined by solid-phase microextraction. Chemosphere 2007, 66 (8), 1580-1589. DOI: https://doi.org/10.1016/j.chemosphere.2006.08.006.
035065-29-3	PCB 180	6.67	3	Aldrich HA	Solid Phase Dosing and Sampling	20	7.03~7.06	ter Laak, T. L.; van Eijkeren, J. C. H.; Busser, F. J. M.; van Leeuwen, H. P.; Hermens, J. L. M. Facilitated Transport of Polychlorinated Biphenyls and Polybrominated Diphenyl Ethers by Dissolved Organic Matter. Environmental Science & Technology 2009, 43 (5), 1379-1385. DOI: 10.1021/es802403v.
035065-29-3	PCB 180	7.12	3	Aldrich HA	Solid Phase Dosing and Sampling	21	NA	Durjava, M. K.; ter Laak, T. L.; Hermens, J. L. M.; Struijs, J. Distribution of PAHs and PCBs to dissolved organic matter: High distribution coefficients with consequences for environmental fate modeling. Chemosphere 2007, 67 (5), 990-997. DOI: https://doi.org/10.1016/j.chemosphere.2006.10.059.
035065-29-3	PCB 180	6.86	3	Aldrich HA	SPME	25	7.3	Xie, M.; Yang, Z.-Y.; Bao, L.-J.; Zeng, E. Y. Equilibrium and kinetic solid-phase microextraction determination of the partition coefficients between polychlorinated biphenyl congeners and dissolved humic acid. Journal of Chromatography A 2009, 1216 (21), 4553-4559. DOI: https://doi.org/10.1016/j.chroma.2009.03.075.
035065-29-3	PCB 180	6.88	3	Aldrich HA	SPME	25	7.3	Xie, M.; Yang, Z.-Y.; Bao, L.-J.; Zeng, E. Y. Equilibrium and kinetic solid-phase microextraction determination of the partition coefficients between polychlorinated biphenyl congeners and dissolved humic acid. Journal of Chromatography A 2009, 1216 (21), 4553-4559. DOI: https://doi.org/10.1016/j.chroma.2009.03.075.
035693-99-3	PCB 52	5.28	3	Aldrich HA	Solid Phase Dosing and Sampling	20	7.03~7.06	ter Laak, T. L.; van Eijkeren, J. C. H.; Busser, F. J. M.; van Leeuwen, H. P.; Hermens, J. L. M. Facilitated Transport of Polychlorinated Biphenyls and Polybrominated Diphenyl Ethers by Dissolved Organic Matter. Environmental Science & Technology 2009, 43 (5), 1379-1385. DOI: 10.1021/es802403v.
035693-99-3	PCB 52	5.13	3	Roth HA	SPME		6	Poerschmann, J.; Kopinke, F.-D. Sorption of Very Hydrophobic Organic Compounds (VHOCs) on Dissolved Humic Organic Matter (DOM). 2. Measurement of Sorption and Application of a Flory−Huggins Concept To Interpret the Data †. Environmental science & technology 2001, 35, 1142-1148. DOI: 10.1021/es0017615.
035693-99-3	PCB 52	6.05	3	Aldrich HA	Solid Phase Dosing and Sampling	21	NA	Durjava, M. K.; ter Laak, T. L.; Hermens, J. L. M.; Struijs, J. Distribution of PAHs and PCBs to dissolved organic matter: High distribution coefficients with consequences for environmental fate modeling. Chemosphere 2007, 67 (5), 990-997. DOI: https://doi.org/10.1016/j.chemosphere.2006.10.059.
035693-99-3	PCB 52	5.64	3	Aldrich HA	SPME	25	7.3	Xie, M.; Yang, Z.-Y.; Bao, L.-J.; Zeng, E. Y. Equilibrium and kinetic solid-phase microextraction determination of the partition coefficients between polychlorinated biphenyl congeners and dissolved humic acid. Journal of Chromatography A 2009, 1216 (21), 4553-4559. DOI: https://doi.org/10.1016/j.chroma.2009.03.075.
035693-99-3	PCB 52	5.77	3	Aldrich HA	SPME	25	7.3	Xie, M.; Yang, Z.-Y.; Bao, L.-J.; Zeng, E. Y. Equilibrium and kinetic solid-phase microextraction determination of the partition coefficients between polychlorinated biphenyl congeners and dissolved humic acid. Journal of Chromatography A 2009, 1216 (21), 4553-4559. DOI: https://doi.org/10.1016/j.chroma.2009.03.075.
035694-08-7	PCB 194	7.31	3	Aldrich HA	SPME	25	7.3	Xie, M.; Yang, Z.-Y.; Bao, L.-J.; Zeng, E. Y. Equilibrium and kinetic solid-phase microextraction determination of the partition coefficients between polychlorinated biphenyl congeners and dissolved humic acid. Journal of Chromatography A 2009, 1216 (21), 4553-4559. DOI: https://doi.org/10.1016/j.chroma.2009.03.075.
035694-08-7	PCB 194	7.28	3	Aldrich HA	SPME	25	7.3	Xie, M.; Yang, Z.-Y.; Bao, L.-J.; Zeng, E. Y. Equilibrium and kinetic solid-phase microextraction determination of the partition coefficients between polychlorinated biphenyl congeners and dissolved humic acid. Journal of Chromatography A 2009, 1216 (21), 4553-4559. DOI: https://doi.org/10.1016/j.chroma.2009.03.075.
035822-46-9	1234678-HpCDD	6	2	Soil Porewater DOM	LLE	20	6.8~9.1	Frankki, S.; Persson, Y.; Tysklind, M.; Skyllberg, U. Partitioning of CPs, PCDEs, and PCDD/Fs between Particulate and Experimentally Enhanced Dissolved Natural Organic Matter in a Contaminated Soil. Environmental Science & Technology 2006, 40 (21), 6668-6673. DOI: 10.1021/es0608850.
035822-46-9	1,2,3,4,6,7,8-HpCDD	7.55	3	Aldrich HA	Passive dosing	25	6.95~7.05	Schacht, V. J.; Manning, M.; Grant, S. C.; Gaus, C.; Hawker, D. W. Simultaneous quantification of humic acid-water and silanized glass-water partition constants for PCBs, PCDDs and OCDF. Chemosphere 2020, 243, 125338. DOI: https://doi.org/10.1016/j.chemosphere.2019.125338.
037680-65-2	PCB 18	4.8	3	Aldrich HA	Solid Phase Dosing and Sampling	20	7.03~7.06	ter Laak, T. L.; van Eijkeren, J. C. H.; Busser, F. J. M.; van Leeuwen, H. P.; Hermens, J. L. M. Facilitated Transport of Polychlorinated Biphenyls and Polybrominated Diphenyl Ethers by Dissolved Organic Matter. Environmental Science & Technology 2009, 43 (5), 1379-1385. DOI: 10.1021/es802403v.
037680-69-6	PCB 35	5.34	3	Aldrich HA	Solid Phase Dosing and Sampling	20	7.03~7.06	ter Laak, T. L.; van Eijkeren, J. C. H.; Busser, F. J. M.; van Leeuwen, H. P.; Hermens, J. L. M. Facilitated Transport of Polychlorinated Biphenyls and Polybrominated Diphenyl Ethers by Dissolved Organic Matter. Environmental Science & Technology 2009, 43 (5), 1379-1385. DOI: 10.1021/es802403v.
037680-73-2	PCB 101	5.87	3	Aldrich HA	Solid Phase Dosing and Sampling	20	7.03~7.06	ter Laak, T. L.; van Eijkeren, J. C. H.; Busser, F. J. M.; van Leeuwen, H. P.; Hermens, J. L. M. Facilitated Transport of Polychlorinated Biphenyls and Polybrominated Diphenyl Ethers by Dissolved Organic Matter. Environmental Science & Technology 2009, 43 (5), 1379-1385. DOI: 10.1021/es802403v.
037680-73-2	PCB 101	6.51	3	Aldrich HA	Solid Phase Dosing and Sampling	21	NA	Durjava, M. K.; ter Laak, T. L.; Hermens, J. L. M.; Struijs, J. Distribution of PAHs and PCBs to dissolved organic matter: High distribution coefficients with consequences for environmental fate modeling. Chemosphere 2007, 67 (5), 990-997. DOI: https://doi.org/10.1016/j.chemosphere.2006.10.059.
037680-73-2	PCB 101	6.18	3	Aldrich HA	SPME	25	7.3	Xie, M.; Yang, Z.-Y.; Bao, L.-J.; Zeng, E. Y. Equilibrium and kinetic solid-phase microextraction determination of the partition coefficients between polychlorinated biphenyl congeners and dissolved humic acid. Journal of Chromatography A 2009, 1216 (21), 4553-4559. DOI: https://doi.org/10.1016/j.chroma.2009.03.075.
037680-73-2	PCB 101	6.22	3	Aldrich HA	SPME	25	7.3	Xie, M.; Yang, Z.-Y.; Bao, L.-J.; Zeng, E. Y. Equilibrium and kinetic solid-phase microextraction determination of the partition coefficients between polychlorinated biphenyl congeners and dissolved humic acid. Journal of Chromatography A 2009, 1216 (21), 4553-4559. DOI: https://doi.org/10.1016/j.chroma.2009.03.075.
038411-25-5	PCB 174	6.79	3	Aldrich HA	SPME	25	7.3	Xie, M.; Yang, Z.-Y.; Bao, L.-J.; Zeng, E. Y. Equilibrium and kinetic solid-phase microextraction determination of the partition coefficients between polychlorinated biphenyl congeners and dissolved humic acid. Journal of Chromatography A 2009, 1216 (21), 4553-4559. DOI: https://doi.org/10.1016/j.chroma.2009.03.075.
038411-25-5	PCB 174	6.8	3	Aldrich HA	SPME	25	7.3	Xie, M.; Yang, Z.-Y.; Bao, L.-J.; Zeng, E. Y. Equilibrium and kinetic solid-phase microextraction determination of the partition coefficients between polychlorinated biphenyl congeners and dissolved humic acid. Journal of Chromatography A 2009, 1216 (21), 4553-4559. DOI: https://doi.org/10.1016/j.chroma.2009.03.075.
039001-02-0	OCDF	6.2	2	Soil Porewater DOM	LLE	20	6.8~9.1	Frankki, S.; Persson, Y.; Tysklind, M.; Skyllberg, U. Partitioning of CPs, PCDEs, and PCDD/Fs between Particulate and Experimentally Enhanced Dissolved Natural Organic Matter in a Contaminated Soil. Environmental Science & Technology 2006, 40 (21), 6668-6673. DOI: 10.1021/es0608850.
039001-02-0	OCDF	8.2	3	Aldrich HA	Passive dosing	25	6.95~7.05	Schacht, V. J.; Manning, M.; Grant, S. C.; Gaus, C.; Hawker, D. W. Simultaneous quantification of humic acid-water and silanized glass-water partition constants for PCBs, PCDDs and OCDF. Chemosphere 2020, 243, 125338. DOI: https://doi.org/10.1016/j.chemosphere.2019.125338.
039227-62-8	124679-HxCDD	6.6	2	Soil Porewater DOM	LLE	20	6.8~9.1	Frankki, S.; Persson, Y.; Tysklind, M.; Skyllberg, U. Partitioning of CPs, PCDEs, and PCDD/Fs between Particulate and Experimentally Enhanced Dissolved Natural Organic Matter in a Contaminated Soil. Environmental Science & Technology 2006, 40 (21), 6668-6673. DOI: 10.1021/es0608850.
039515-41-8	Fenpropathrin	5.857	1	Sediment Porewater DOM	SPME		6.12	Cui, X.; Gan, J. Comparing sorption behavior of pyrethroids between formulated and natural sediments. Environmental toxicology and chemistry 2013, 32 (5), 1033-1039. DOI: 10.1002/etc.2161 (acccessed 1/7/2025).
039515-41-8	Fenpropathrin	5.544	1	Sediment Porewater DOM	SPME		6.76	Cui, X.; Gan, J. Comparing sorption behavior of pyrethroids between formulated and natural sediments. Environmental toxicology and chemistry 2013, 32 (5), 1033-1039. DOI: 10.1002/etc.2161 (acccessed 1/7/2025).
039515-41-8	fenpropathrin	4.845	1	Sediment Porewater DOM	SPME	room temperature		Bondarenko, S.; Gan, J. Simultaneous Measurement of Free and Total Concentrations of Hydrophobic Compounds. Environmental Science & Technology 2009, 43 (10), 3772-3777. DOI: 10.1021/es8037033.
039515-41-8	fenpropathrin	4	1	Sediment Porewater DOM	SPME	room temperature		Bondarenko, S.; Gan, J. Simultaneous Measurement of Free and Total Concentrations of Hydrophobic Compounds. Environmental Science & Technology 2009, 43 (10), 3772-3777. DOI: 10.1021/es8037033.
039515-41-8	fenpropathrin	5	1	Sediment Porewater DOM	SPME	room temperature		Bondarenko, S.; Gan, J. Simultaneous Measurement of Free and Total Concentrations of Hydrophobic Compounds. Environmental Science & Technology 2009, 43 (10), 3772-3777. DOI: 10.1021/es8037033.
039635-31-9	PCB 189	7.13	3	Aldrich HA	SPME	25	7.3	Xie, M.; Yang, Z.-Y.; Bao, L.-J.; Zeng, E. Y. Equilibrium and kinetic solid-phase microextraction determination of the partition coefficients between polychlorinated biphenyl congeners and dissolved humic acid. Journal of Chromatography A 2009, 1216 (21), 4553-4559. DOI: https://doi.org/10.1016/j.chroma.2009.03.075.
039635-31-9	PCB 189	7.13	3	Aldrich HA	SPME	25	7.3	Xie, M.; Yang, Z.-Y.; Bao, L.-J.; Zeng, E. Y. Equilibrium and kinetic solid-phase microextraction determination of the partition coefficients between polychlorinated biphenyl congeners and dissolved humic acid. Journal of Chromatography A 2009, 1216 (21), 4553-4559. DOI: https://doi.org/10.1016/j.chroma.2009.03.075.
040186-71-8	PCB 201	6.93	3	Aldrich HA	SPME	25	7.3	Xie, M.; Yang, Z.-Y.; Bao, L.-J.; Zeng, E. Y. Equilibrium and kinetic solid-phase microextraction determination of the partition coefficients between polychlorinated biphenyl congeners and dissolved humic acid. Journal of Chromatography A 2009, 1216 (21), 4553-4559. DOI: https://doi.org/10.1016/j.chroma.2009.03.075.
040186-71-8	PCB 201	7.03	3	Aldrich HA	SPME	25	7.3	Xie, M.; Yang, Z.-Y.; Bao, L.-J.; Zeng, E. Y. Equilibrium and kinetic solid-phase microextraction determination of the partition coefficients between polychlorinated biphenyl congeners and dissolved humic acid. Journal of Chromatography A 2009, 1216 (21), 4553-4559. DOI: https://doi.org/10.1016/j.chroma.2009.03.075.
040186-72-9	PCB 206	6.94	3	Aldrich HA	SPME	25	7.3	Xie, M.; Yang, Z.-Y.; Bao, L.-J.; Zeng, E. Y. Equilibrium and kinetic solid-phase microextraction determination of the partition coefficients between polychlorinated biphenyl congeners and dissolved humic acid. Journal of Chromatography A 2009, 1216 (21), 4553-4559. DOI: https://doi.org/10.1016/j.chroma.2009.03.075.
040186-72-9	PCB 206	6.93	3	Aldrich HA	SPME	25	7.3	Xie, M.; Yang, Z.-Y.; Bao, L.-J.; Zeng, E. Y. Equilibrium and kinetic solid-phase microextraction determination of the partition coefficients between polychlorinated biphenyl congeners and dissolved humic acid. Journal of Chromatography A 2009, 1216 (21), 4553-4559. DOI: https://doi.org/10.1016/j.chroma.2009.03.075.
040186-72-9	PCB 206	7.5	3	Aldrich HA	Passive dosing	25	6.95~7.05	Schacht, V. J.; Manning, M.; Grant, S. C.; Gaus, C.; Hawker, D. W. Simultaneous quantification of humic acid-water and silanized glass-water partition constants for PCBs, PCDDs and OCDF. Chemosphere 2020, 243, 125338. DOI: https://doi.org/10.1016/j.chemosphere.2019.125338.
040321-76-4	12378-PeCDD	4.9	2	Soil Porewater DOM	LLE	20	6.8~9.1	Frankki, S.; Persson, Y.; Tysklind, M.; Skyllberg, U. Partitioning of CPs, PCDEs, and PCDD/Fs between Particulate and Experimentally Enhanced Dissolved Natural Organic Matter in a Contaminated Soil. Environmental Science & Technology 2006, 40 (21), 6668-6673. DOI: 10.1021/es0608850.
040321-76-4	1,2,3,7,8-PeCDD	6.84	3	Aldrich HA	Passive dosing	25	6.95~7.05	Schacht, V. J.; Manning, M.; Grant, S. C.; Gaus, C.; Hawker, D. W. Simultaneous quantification of humic acid-water and silanized glass-water partition constants for PCBs, PCDDs and OCDF. Chemosphere 2020, 243, 125338. DOI: https://doi.org/10.1016/j.chemosphere.2019.125338.
041318-75-6	BDE-28	5.81	1	Sediment Porewater DOM	SPME	room temperature		Wang, W.; Delgado-Moreno, L.; Ye, Q.; Gan, J. Improved Measurements of Partition Coefficients for Polybrominated Diphenyl Ethers. Environmental Science & Technology 2011, 45 (4), 1521-1527. DOI: 10.1021/es103087a.
041318-75-6	BDE-28	5.68	1	Sediment Porewater DOM	SPME	room temperature		Wang, W.; Delgado-Moreno, L.; Ye, Q.; Gan, J. Improved Measurements of Partition Coefficients for Polybrominated Diphenyl Ethers. Environmental Science & Technology 2011, 45 (4), 1521-1527. DOI: 10.1021/es103087a.
041318-75-6	BDE-28	6.3	1	Sediment Porewater DOM	SPME	room temperature		Wang, W.; Delgado-Moreno, L.; Ye, Q.; Gan, J. Improved Measurements of Partition Coefficients for Polybrominated Diphenyl Ethers. Environmental Science & Technology 2011, 45 (4), 1521-1527. DOI: 10.1021/es103087a.
041318-75-6	BDE-28	6.81	1	Sediment Porewater DOM	SPME	room temperature		Wang, W.; Delgado-Moreno, L.; Ye, Q.; Gan, J. Improved Measurements of Partition Coefficients for Polybrominated Diphenyl Ethers. Environmental Science & Technology 2011, 45 (4), 1521-1527. DOI: 10.1021/es103087a.
041318-75-6	BDE-28	4.98	1	Surface Water DOM	Passive sampling	20		Khairy, M. A.; Lohmann, R. Using Polyethylene Passive Samplers To Study the Partitioning and Fluxes of Polybrominated Diphenyl Ethers in an Urban River. Environmental Science & Technology 2017, 51 (16), 9062-9071. DOI: 10.1021/acs.est.7b02418.
041411-62-5	PCB 160	6.64	3	Aldrich HA	SPME	25	7.3	Xie, M.; Yang, Z.-Y.; Bao, L.-J.; Zeng, E. Y. Equilibrium and kinetic solid-phase microextraction determination of the partition coefficients between polychlorinated biphenyl congeners and dissolved humic acid. Journal of Chromatography A 2009, 1216 (21), 4553-4559. DOI: https://doi.org/10.1016/j.chroma.2009.03.075.
041411-62-5	PCB 160	6.6	3	Aldrich HA	SPME	25	7.3	Xie, M.; Yang, Z.-Y.; Bao, L.-J.; Zeng, E. Y. Equilibrium and kinetic solid-phase microextraction determination of the partition coefficients between polychlorinated biphenyl congeners and dissolved humic acid. Journal of Chromatography A 2009, 1216 (21), 4553-4559. DOI: https://doi.org/10.1016/j.chroma.2009.03.075.
041411-64-7	PCB 190	6.99	3	Aldrich HA	SPME	25	7.3	Xie, M.; Yang, Z.-Y.; Bao, L.-J.; Zeng, E. Y. Equilibrium and kinetic solid-phase microextraction determination of the partition coefficients between polychlorinated biphenyl congeners and dissolved humic acid. Journal of Chromatography A 2009, 1216 (21), 4553-4559. DOI: https://doi.org/10.1016/j.chroma.2009.03.075.
041411-64-7	PCB 190	6.91	3	Aldrich HA	SPME	25	7.3	Xie, M.; Yang, Z.-Y.; Bao, L.-J.; Zeng, E. Y. Equilibrium and kinetic solid-phase microextraction determination of the partition coefficients between polychlorinated biphenyl congeners and dissolved humic acid. Journal of Chromatography A 2009, 1216 (21), 4553-4559. DOI: https://doi.org/10.1016/j.chroma.2009.03.075.
041464-42-0	PCB 72	5.64	3	Aldrich HA	Solid Phase Dosing and Sampling	20	7.03~7.06	ter Laak, T. L.; van Eijkeren, J. C. H.; Busser, F. J. M.; van Leeuwen, H. P.; Hermens, J. L. M. Facilitated Transport of Polychlorinated Biphenyls and Polybrominated Diphenyl Ethers by Dissolved Organic Matter. Environmental Science & Technology 2009, 43 (5), 1379-1385. DOI: 10.1021/es802403v.
042740-50-1	PCB 196	6.91	3	Aldrich HA	SPME	25	7.3	Xie, M.; Yang, Z.-Y.; Bao, L.-J.; Zeng, E. Y. Equilibrium and kinetic solid-phase microextraction determination of the partition coefficients between polychlorinated biphenyl congeners and dissolved humic acid. Journal of Chromatography A 2009, 1216 (21), 4553-4559. DOI: https://doi.org/10.1016/j.chroma.2009.03.075.
042740-50-1	PCB 196	6.91	3	Aldrich HA	SPME	25	7.3	Xie, M.; Yang, Z.-Y.; Bao, L.-J.; Zeng, E. Y. Equilibrium and kinetic solid-phase microextraction determination of the partition coefficients between polychlorinated biphenyl congeners and dissolved humic acid. Journal of Chromatography A 2009, 1216 (21), 4553-4559. DOI: https://doi.org/10.1016/j.chroma.2009.03.075.
052315-07-8	cypermethrin	5.322	1	Sediment Porewater DOM	SPME	room temperature		Bondarenko, S.; Gan, J. Simultaneous Measurement of Free and Total Concentrations of Hydrophobic Compounds. Environmental Science & Technology 2009, 43 (10), 3772-3777. DOI: 10.1021/es8037033.
052315-07-8	cypermethrin	4.778	1	Sediment Porewater DOM	SPME	room temperature		Bondarenko, S.; Gan, J. Simultaneous Measurement of Free and Total Concentrations of Hydrophobic Compounds. Environmental Science & Technology 2009, 43 (10), 3772-3777. DOI: 10.1021/es8037033.
052315-07-8	cypermethrin	5.556	1	Sediment Porewater DOM	SPME	room temperature		Bondarenko, S.; Gan, J. Simultaneous Measurement of Free and Total Concentrations of Hydrophobic Compounds. Environmental Science & Technology 2009, 43 (10), 3772-3777. DOI: 10.1021/es8037033.
052315-07-8	cypermethrin	5.15	1	Surface Water DOM	SPME	21	7.13	Haftka, J. J. H.; Scherpenisse, P.; Jonker, M. T. O.; Hermens, J. L. M. Using Polyacrylate-Coated SPME Fibers To Quantify Sorption of Polar and Ionic Organic Contaminants to Dissolved Organic Carbon. Environmental Science & Technology 2013, 47 (9), 4455-4462. DOI: 10.1021/es400236a.
052315-07-8	cypermethrin	5.2	2	Soil Porewater DOM	SPME	21	5.38	Haftka, J. J. H.; Scherpenisse, P.; Jonker, M. T. O.; Hermens, J. L. M. Using Polyacrylate-Coated SPME Fibers To Quantify Sorption of Polar and Ionic Organic Contaminants to Dissolved Organic Carbon. Environmental Science & Technology 2013, 47 (9), 4455-4462. DOI: 10.1021/es400236a.
052645-53-1	permethrin	5.51	1	Surface Water DOM	SPME	21	6.94	Haftka, J. J. H.; Scherpenisse, P.; Jonker, M. T. O.; Hermens, J. L. M. Using Polyacrylate-Coated SPME Fibers To Quantify Sorption of Polar and Ionic Organic Contaminants to Dissolved Organic Carbon. Environmental Science & Technology 2013, 47 (9), 4455-4462. DOI: 10.1021/es400236a.
052645-53-1	permethrin	5.6	1	Surface Water DOM	SPME	21	7.13	Haftka, J. J. H.; Scherpenisse, P.; Jonker, M. T. O.; Hermens, J. L. M. Using Polyacrylate-Coated SPME Fibers To Quantify Sorption of Polar and Ionic Organic Contaminants to Dissolved Organic Carbon. Environmental Science & Technology 2013, 47 (9), 4455-4462. DOI: 10.1021/es400236a.
052645-53-1	permethrin	4.204	1	Surface Water DOM	SPME	room temperature	7.3	Yang, W. C.; Hunter, W.; Spurlock, F.; Gan, J. Bioavailability of Permethrin and Cyfluthrin in Surface Waters with Low Levels of Dissolved Organic Matter. Journal of Environmental Quality 2007, 36 (6).
052645-53-1	permethrin	4.58	1	Surface Water DOM	SPME	room temperature	6.87	Yang, W. C.; Hunter, W.; Spurlock, F.; Gan, J. Bioavailability of Permethrin and Cyfluthrin in Surface Waters with Low Levels of Dissolved Organic Matter. Journal of Environmental Quality 2007, 36 (6).
052645-53-1	permethrin	4.898	1	Surface Water DOM	SPME	room temperature	6.85	Yang, W. C.; Hunter, W.; Spurlock, F.; Gan, J. Bioavailability of Permethrin and Cyfluthrin in Surface Waters with Low Levels of Dissolved Organic Matter. Journal of Environmental Quality 2007, 36 (6).
052645-53-1	permethrin	5.62	2	Soil Porewater DOM	SPME	21	5.38	Haftka, J. J. H.; Scherpenisse, P.; Jonker, M. T. O.; Hermens, J. L. M. Using Polyacrylate-Coated SPME Fibers To Quantify Sorption of Polar and Ionic Organic Contaminants to Dissolved Organic Carbon. Environmental Science & Technology 2013, 47 (9), 4455-4462. DOI: 10.1021/es400236a.
052663-67-9	PCB 178	6.8	3	Aldrich HA	SPME	25	7.3	Xie, M.; Yang, Z.-Y.; Bao, L.-J.; Zeng, E. Y. Equilibrium and kinetic solid-phase microextraction determination of the partition coefficients between polychlorinated biphenyl congeners and dissolved humic acid. Journal of Chromatography A 2009, 1216 (21), 4553-4559. DOI: https://doi.org/10.1016/j.chroma.2009.03.075.
052663-67-9	PCB 178	6.79	3	Aldrich HA	SPME	25	7.3	Xie, M.; Yang, Z.-Y.; Bao, L.-J.; Zeng, E. Y. Equilibrium and kinetic solid-phase microextraction determination of the partition coefficients between polychlorinated biphenyl congeners and dissolved humic acid. Journal of Chromatography A 2009, 1216 (21), 4553-4559. DOI: https://doi.org/10.1016/j.chroma.2009.03.075.
052663-69-1	PCB 183	6.86	3	Aldrich HA	SPME	25	7.3	Xie, M.; Yang, Z.-Y.; Bao, L.-J.; Zeng, E. Y. Equilibrium and kinetic solid-phase microextraction determination of the partition coefficients between polychlorinated biphenyl congeners and dissolved humic acid. Journal of Chromatography A 2009, 1216 (21), 4553-4559. DOI: https://doi.org/10.1016/j.chroma.2009.03.075.
052663-69-1	PCB 183	6.86	3	Aldrich HA	SPME	25	7.3	Xie, M.; Yang, Z.-Y.; Bao, L.-J.; Zeng, E. Y. Equilibrium and kinetic solid-phase microextraction determination of the partition coefficients between polychlorinated biphenyl congeners and dissolved humic acid. Journal of Chromatography A 2009, 1216 (21), 4553-4559. DOI: https://doi.org/10.1016/j.chroma.2009.03.075.
052663-71-5	PCB 171	6.87	3	Aldrich HA	SPME	25	7.3	Xie, M.; Yang, Z.-Y.; Bao, L.-J.; Zeng, E. Y. Equilibrium and kinetic solid-phase microextraction determination of the partition coefficients between polychlorinated biphenyl congeners and dissolved humic acid. Journal of Chromatography A 2009, 1216 (21), 4553-4559. DOI: https://doi.org/10.1016/j.chroma.2009.03.075.
052663-71-5	PCB 171	6.88	3	Aldrich HA	SPME	25	7.3	Xie, M.; Yang, Z.-Y.; Bao, L.-J.; Zeng, E. Y. Equilibrium and kinetic solid-phase microextraction determination of the partition coefficients between polychlorinated biphenyl congeners and dissolved humic acid. Journal of Chromatography A 2009, 1216 (21), 4553-4559. DOI: https://doi.org/10.1016/j.chroma.2009.03.075.
052663-73-7	PCB 200	6.81	3	Aldrich HA	SPME	25	7.3	Xie, M.; Yang, Z.-Y.; Bao, L.-J.; Zeng, E. Y. Equilibrium and kinetic solid-phase microextraction determination of the partition coefficients between polychlorinated biphenyl congeners and dissolved humic acid. Journal of Chromatography A 2009, 1216 (21), 4553-4559. DOI: https://doi.org/10.1016/j.chroma.2009.03.075.
052663-73-7	PCB 200	6.85	3	Aldrich HA	SPME	25	7.3	Xie, M.; Yang, Z.-Y.; Bao, L.-J.; Zeng, E. Y. Equilibrium and kinetic solid-phase microextraction determination of the partition coefficients between polychlorinated biphenyl congeners and dissolved humic acid. Journal of Chromatography A 2009, 1216 (21), 4553-4559. DOI: https://doi.org/10.1016/j.chroma.2009.03.075.
052663-76-0	PCB 203	6.62	3	Aldrich HA	Solid Phase Dosing and Sampling	20	7.03~7.06	ter Laak, T. L.; van Eijkeren, J. C. H.; Busser, F. J. M.; van Leeuwen, H. P.; Hermens, J. L. M. Facilitated Transport of Polychlorinated Biphenyls and Polybrominated Diphenyl Ethers by Dissolved Organic Matter. Environmental Science & Technology 2009, 43 (5), 1379-1385. DOI: 10.1021/es802403v.
052663-77-1	PCB 208	6.81	3	Aldrich HA	SPME	25	7.3	Xie, M.; Yang, Z.-Y.; Bao, L.-J.; Zeng, E. Y. Equilibrium and kinetic solid-phase microextraction determination of the partition coefficients between polychlorinated biphenyl congeners and dissolved humic acid. Journal of Chromatography A 2009, 1216 (21), 4553-4559. DOI: https://doi.org/10.1016/j.chroma.2009.03.075.
052663-77-1	PCB 208	6.86	3	Aldrich HA	SPME	25	7.3	Xie, M.; Yang, Z.-Y.; Bao, L.-J.; Zeng, E. Y. Equilibrium and kinetic solid-phase microextraction determination of the partition coefficients between polychlorinated biphenyl congeners and dissolved humic acid. Journal of Chromatography A 2009, 1216 (21), 4553-4559. DOI: https://doi.org/10.1016/j.chroma.2009.03.076.
052712-05-7	PCB 185	6.84	3	Aldrich HA	SPME	25	7.3	Xie, M.; Yang, Z.-Y.; Bao, L.-J.; Zeng, E. Y. Equilibrium and kinetic solid-phase microextraction determination of the partition coefficients between polychlorinated biphenyl congeners and dissolved humic acid. Journal of Chromatography A 2009, 1216 (21), 4553-4559. DOI: https://doi.org/10.1016/j.chroma.2009.03.077.
052712-05-7	PCB 185	6.84	3	Aldrich HA	SPME	25	7.3	Xie, M.; Yang, Z.-Y.; Bao, L.-J.; Zeng, E. Y. Equilibrium and kinetic solid-phase microextraction determination of the partition coefficients between polychlorinated biphenyl congeners and dissolved humic acid. Journal of Chromatography A 2009, 1216 (21), 4553-4559. DOI: https://doi.org/10.1016/j.chroma.2009.03.078.
052918-63-5	Deltamethrin	6.627	1	Sediment Porewater DOM	SPME		6.12	Cui, X.; Gan, J. Comparing sorption behavior of pyrethroids between formulated and natural sediments. Environmental toxicology and chemistry 2013, 32 (5), 1033-1039. DOI: 10.1002/etc.2161 (acccessed 1/7/2025).
052918-63-5	Deltamethrin	6.501	1	Sediment Porewater DOM	SPME		6.76	Cui, X.; Gan, J. Comparing sorption behavior of pyrethroids between formulated and natural sediments. Environmental toxicology and chemistry 2013, 32 (5), 1033-1039. DOI: 10.1002/etc.2161 (acccessed 1/7/2025).
052918-63-5	deltamethrin	5.556	1	Sediment Porewater DOM	SPME	room temperature		Bondarenko, S.; Gan, J. Simultaneous Measurement of Free and Total Concentrations of Hydrophobic Compounds. Environmental Science & Technology 2009, 43 (10), 3772-3777. DOI: 10.1021/es8037033.
052918-63-5	deltamethrin	5.079	1	Sediment Porewater DOM	SPME	room temperature		Bondarenko, S.; Gan, J. Simultaneous Measurement of Free and Total Concentrations of Hydrophobic Compounds. Environmental Science & Technology 2009, 43 (10), 3772-3777. DOI: 10.1021/es8037033.
052918-63-5	deltamethrin	5.716	1	Sediment Porewater DOM	SPME	room temperature		Bondarenko, S.; Gan, J. Simultaneous Measurement of Free and Total Concentrations of Hydrophobic Compounds. Environmental Science & Technology 2009, 43 (10), 3772-3777. DOI: 10.1021/es8037033.
052918-63-5	deltamethrin	5.16	1	Surface Water DOM	SPME	21	6.94	Haftka, J. J. H.; Scherpenisse, P.; Jonker, M. T. O.; Hermens, J. L. M. Using Polyacrylate-Coated SPME Fibers To Quantify Sorption of Polar and Ionic Organic Contaminants to Dissolved Organic Carbon. Environmental Science & Technology 2013, 47 (9), 4455-4462. DOI: 10.1021/es400236a.
052918-63-5	deltamethrin	5.21	1	Surface Water DOM	SPME	21	7.13	Haftka, J. J. H.; Scherpenisse, P.; Jonker, M. T. O.; Hermens, J. L. M. Using Polyacrylate-Coated SPME Fibers To Quantify Sorption of Polar and Ionic Organic Contaminants to Dissolved Organic Carbon. Environmental Science & Technology 2013, 47 (9), 4455-4462. DOI: 10.1021/es400236a.
052918-63-5	deltamethrin	5.23	2	Soil Porewater DOM	SPME	21	5.38	Haftka, J. J. H.; Scherpenisse, P.; Jonker, M. T. O.; Hermens, J. L. M. Using Polyacrylate-Coated SPME Fibers To Quantify Sorption of Polar and Ionic Organic Contaminants to Dissolved Organic Carbon. Environmental Science & Technology 2013, 47 (9), 4455-4462. DOI: 10.1021/es400236a.
053494-70-5	Endrin ketone	4.36	3	Fluka HA	TECAM	20	7.5	Ke, R.; Wang, Z.; Huang, S.; Khan, S. U. Accurate quantification of freely dissolved organochlorine pesticides in water in the presence of dissolved organic matter using triolein-embedded cellulose acetate membrane. Analytical and Bioanalytical Chemistry 2007, 387 (8), 2871-2879. DOI: 10.1007/s00216-007-1174-6.
055673-89-7	1234789-HpCDF	5.8	2	Soil Porewater DOM	LLE	20	6.8~9.1	Frankki, S.; Persson, Y.; Tysklind, M.; Skyllberg, U. Partitioning of CPs, PCDEs, and PCDD/Fs between Particulate and Experimentally Enhanced Dissolved Natural Organic Matter in a Contaminated Soil. Environmental Science & Technology 2006, 40 (21), 6668-6673. DOI: 10.1021/es0608850.
057465-28-8	PCB 126	6.47	3	Aldrich HA	Solid Phase Dosing and Sampling	20	7.03~7.06	ter Laak, T. L.; van Eijkeren, J. C. H.; Busser, F. J. M.; van Leeuwen, H. P.; Hermens, J. L. M. Facilitated Transport of Polychlorinated Biphenyls and Polybrominated Diphenyl Ethers by Dissolved Organic Matter. Environmental Science & Technology 2009, 43 (5), 1379-1385. DOI: 10.1021/es802403v.
057653-85-7	123678-HxCDD	5.9	2	Soil Porewater DOM	LLE	20	6.8~9.1	Frankki, S.; Persson, Y.; Tysklind, M.; Skyllberg, U. Partitioning of CPs, PCDEs, and PCDD/Fs between Particulate and Experimentally Enhanced Dissolved Natural Organic Matter in a Contaminated Soil. Environmental Science & Technology 2006, 40 (21), 6668-6673. DOI: 10.1021/es0608850.
058200-66-1	123467-HxCDD	5.6	2	Soil Porewater DOM	LLE	20	6.8~9.1	Frankki, S.; Persson, Y.; Tysklind, M.; Skyllberg, U. Partitioning of CPs, PCDEs, and PCDD/Fs between Particulate and Experimentally Enhanced Dissolved Natural Organic Matter in a Contaminated Soil. Environmental Science & Technology 2006, 40 (21), 6668-6673. DOI: 10.1021/es0608850.
058200-67-2	123468-HxCDD	6.7	2	Soil Porewater DOM	LLE	20	6.8~9.1	Frankki, S.; Persson, Y.; Tysklind, M.; Skyllberg, U. Partitioning of CPs, PCDEs, and PCDD/Fs between Particulate and Experimentally Enhanced Dissolved Natural Organic Matter in a Contaminated Soil. Environmental Science & Technology 2006, 40 (21), 6668-6673. DOI: 10.1021/es0608850.
058200-69-4	123689-HxCDD	6.5	2	Soil Porewater DOM	LLE	20	6.8~9.1	Frankki, S.; Persson, Y.; Tysklind, M.; Skyllberg, U. Partitioning of CPs, PCDEs, and PCDD/Fs between Particulate and Experimentally Enhanced Dissolved Natural Organic Matter in a Contaminated Soil. Environmental Science & Technology 2006, 40 (21), 6668-6673. DOI: 10.1021/es0608850.
058200-70-7	1234679-HpCDD	6.2	2	Soil Porewater DOM	LLE	20	6.8~9.1	Frankki, S.; Persson, Y.; Tysklind, M.; Skyllberg, U. Partitioning of CPs, PCDEs, and PCDD/Fs between Particulate and Experimentally Enhanced Dissolved Natural Organic Matter in a Contaminated Soil. Environmental Science & Technology 2006, 40 (21), 6668-6673. DOI: 10.1021/es0608850.
058802-08-7	12478-PeCDD	4.5	2	Soil Porewater DOM	LLE	20	6.8~9.1	Frankki, S.; Persson, Y.; Tysklind, M.; Skyllberg, U. Partitioning of CPs, PCDEs, and PCDD/Fs between Particulate and Experimentally Enhanced Dissolved Natural Organic Matter in a Contaminated Soil. Environmental Science & Technology 2006, 40 (21), 6668-6673. DOI: 10.1021/es0608850.
058802-09-8	124689-HxCDD	6.6	2	Soil Porewater DOM	LLE	20	6.8~9.1	Frankki, S.; Persson, Y.; Tysklind, M.; Skyllberg, U. Partitioning of CPs, PCDEs, and PCDD/Fs between Particulate and Experimentally Enhanced Dissolved Natural Organic Matter in a Contaminated Soil. Environmental Science & Technology 2006, 40 (21), 6668-6673. DOI: 10.1021/es0608850.
058802-15-6	12478-PeCDF	5.8	2	Soil Porewater DOM	LLE	20	6.8~9.1	Frankki, S.; Persson, Y.; Tysklind, M.; Skyllberg, U. Partitioning of CPs, PCDEs, and PCDD/Fs between Particulate and Experimentally Enhanced Dissolved Natural Organic Matter in a Contaminated Soil. Environmental Science & Technology 2006, 40 (21), 6668-6673. DOI: 10.1021/es0608850.
058802-16-7	13478-PeCDF	5.8	2	Soil Porewater DOM	LLE	20	6.8~9.1	Frankki, S.; Persson, Y.; Tysklind, M.; Skyllberg, U. Partitioning of CPs, PCDEs, and PCDD/Fs between Particulate and Experimentally Enhanced Dissolved Natural Organic Matter in a Contaminated Soil. Environmental Science & Technology 2006, 40 (21), 6668-6673. DOI: 10.1021/es0608850.
060145-21-3	2,2′,4,5′,6-pentachlorobiphenyl	5.19	1	Sediment Porewater DOM	SPME			Hawthorne, S. B.; Grabanski, C. B.; Miller, D. J. Solid-Phase-Microextraction Measurement of 62 Polychlorinated Biphenyl Congeners in Milliliter Sediment Pore Water Samples and Determination of KDOC Values. Analytical Chemistry 2009, 81 (16), 6936-6943. DOI: 10.1021/ac901001j.
060145-21-3	2,2′,4,5′,6-pentachlorobiphenyl	4.91	1	Sediment Porewater DOM	SPME			Hawthorne, S. B.; Grabanski, C. B.; Miller, D. J. Solid-Phase-Microextraction Measurement of 62 Polychlorinated Biphenyl Congeners in Milliliter Sediment Pore Water Samples and Determination of KDOC Values. Analytical Chemistry 2009, 81 (16), 6936-6943. DOI: 10.1021/ac901001j.
060145-21-3	2,2′,4,5′,6-pentachlorobiphenyl	4.84	1	Sediment Porewater DOM	SPME			Hawthorne, S. B.; Grabanski, C. B.; Miller, D. J. Solid-Phase-Microextraction Measurement of 62 Polychlorinated Biphenyl Congeners in Milliliter Sediment Pore Water Samples and Determination of KDOC Values. Analytical Chemistry 2009, 81 (16), 6936-6943. DOI: 10.1021/ac901001j.
060145-21-3	PCB 103	6.06	3	Aldrich HA	Passive dosing	25	6.95~7.05	Schacht, V. J.; Manning, M.; Grant, S. C.; Gaus, C.; Hawker, D. W. Simultaneous quantification of humic acid-water and silanized glass-water partition constants for PCBs, PCDDs and OCDF. Chemosphere 2020, 243, 125338. DOI: https://doi.org/10.1016/j.chemosphere.2019.125338.
060145-23-5	PCB 182	6.92	3	Aldrich HA	Passive dosing	25	6.95~7.05	Schacht, V. J.; Manning, M.; Grant, S. C.; Gaus, C.; Hawker, D. W. Simultaneous quantification of humic acid-water and silanized glass-water partition constants for PCBs, PCDDs and OCDF. Chemosphere 2020, 243, 125338. DOI: https://doi.org/10.1016/j.chemosphere.2019.125338.
060348-60-9	2,2′,4,4′,5-pentabromodiphenyl ether	6.35	1	Surface Water DOM	POM-SPE-C14	20	7	Kuivikko, M.; Sorsa, K.; Kukkonen, J. V. K.; Akkanen, J.; Kotiaho, T.; Vähätalo, A. V. Partitioning of tetra- and pentabromo diphenyl ether and benzo[a]pyrene among water and dissolved and particulate organic carbon along a salinity gradient in coastal waters. Environmental toxicology and chemistry 2010, 29 (11), 2443-2449. DOI: 10.1002/etc.308 PubMed.
060348-60-9	2,2′,4,4′,5-pentabromodiphenyl ether	5.98	1	Surface Water DOM	POM-SPE-C12	20	7	Kuivikko, M.; Sorsa, K.; Kukkonen, J. V. K.; Akkanen, J.; Kotiaho, T.; Vähätalo, A. V. Partitioning of tetra- and pentabromo diphenyl ether and benzo[a]pyrene among water and dissolved and particulate organic carbon along a salinity gradient in coastal waters. Environmental toxicology and chemistry 2010, 29 (11), 2443-2449. DOI: 10.1002/etc.308 PubMed.
060348-60-9	BDE-99	6.31	1	Sediment Porewater DOM	SPME	room temperature		Wang, W.; Delgado-Moreno, L.; Ye, Q.; Gan, J. Improved Measurements of Partition Coefficients for Polybrominated Diphenyl Ethers. Environmental Science & Technology 2011, 45 (4), 1521-1527. DOI: 10.1021/es103087a.
060348-60-9	BDE-99	5.1	1	Sediment Porewater DOM	SPME	room temperature		Wang, W.; Delgado-Moreno, L.; Ye, Q.; Gan, J. Improved Measurements of Partition Coefficients for Polybrominated Diphenyl Ethers. Environmental Science & Technology 2011, 45 (4), 1521-1527. DOI: 10.1021/es103087a.
060348-60-9	BDE-99	5.58	1	Sediment Porewater DOM	SPME	room temperature		Wang, W.; Delgado-Moreno, L.; Ye, Q.; Gan, J. Improved Measurements of Partition Coefficients for Polybrominated Diphenyl Ethers. Environmental Science & Technology 2011, 45 (4), 1521-1527. DOI: 10.1021/es103087a.
060348-60-9	BDE-99	6.3	1	Sediment Porewater DOM	SPME	room temperature		Wang, W.; Delgado-Moreno, L.; Ye, Q.; Gan, J. Improved Measurements of Partition Coefficients for Polybrominated Diphenyl Ethers. Environmental Science & Technology 2011, 45 (4), 1521-1527. DOI: 10.1021/es103087a.
060348-60-9	BDE-99	6.32	1	Surface Water DOM	Passive sampling	20		Khairy, M. A.; Lohmann, R. Using Polyethylene Passive Samplers To Study the Partitioning and Fluxes of Polybrominated Diphenyl Ethers in an Urban River. Environmental Science & Technology 2017, 51 (16), 9062-9071. DOI: 10.1021/acs.est.7b02418.
060348-60-9	2,2′,4,4′,5-pentabromodiphenyl ether	6.61	3	Aldrich HA	Solid Phase Dosing and Sampling	20	7.03~7.06	ter Laak, T. L.; van Eijkeren, J. C. H.; Busser, F. J. M.; van Leeuwen, H. P.; Hermens, J. L. M. Facilitated Transport of Polychlorinated Biphenyls and Polybrominated Diphenyl Ethers by Dissolved Organic Matter. Environmental Science & Technology 2009, 43 (5), 1379-1385. DOI: 10.1021/es802403v.
061949-76-6	cis-Permethrin	5.845	1	Sediment Porewater DOM	SPME		6.12	Cui, X.; Gan, J. Comparing sorption behavior of pyrethroids between formulated and natural sediments. Environmental toxicology and chemistry 2013, 32 (5), 1033-1039. DOI: 10.1002/etc.2161 (acccessed 1/7/2025).
061949-76-6	cis-Permethrin	5.732	1	Sediment Porewater DOM	SPME		6.76	Cui, X.; Gan, J. Comparing sorption behavior of pyrethroids between formulated and natural sediments. Environmental toxicology and chemistry 2013, 32 (5), 1033-1039. DOI: 10.1002/etc.2161 (acccessed 1/7/2025).
061949-76-6	cis-permethrin	5.38	1	Sediment Porewater DOM	SPME	room temperature		Bondarenko, S.; Gan, J. Simultaneous Measurement of Free and Total Concentrations of Hydrophobic Compounds. Environmental Science & Technology 2009, 43 (10), 3772-3777. DOI: 10.1021/es8037033.
061949-76-6	cis-permethrin	4.903	1	Sediment Porewater DOM	SPME	room temperature		Bondarenko, S.; Gan, J. Simultaneous Measurement of Free and Total Concentrations of Hydrophobic Compounds. Environmental Science & Technology 2009, 43 (10), 3772-3777. DOI: 10.1021/es8037033.
061949-76-6	cis-permethrin	5.613	1	Sediment Porewater DOM	SPME	room temperature		Bondarenko, S.; Gan, J. Simultaneous Measurement of Free and Total Concentrations of Hydrophobic Compounds. Environmental Science & Technology 2009, 43 (10), 3772-3777. DOI: 10.1021/es8037033.
061949-76-6	cis-permethrin	5.813	1	Sediment Porewater DOM	SPME		7.8	Lee, S.; Gan, J.; Liu, W. P.; Anderson, M. A. Evaluation of Kd Underestimation Using Solid Phase Microextraction. Environmental Science & Technology 2003, 37 (24), 5597-5602. DOI: 10.1021/es0344563.
061949-76-6	cis-permethrin	5.255	1	Sediment Porewater DOM	SPME		7.1	Lee, S.; Gan, J.; Liu, W. P.; Anderson, M. A. Evaluation of Kd Underestimation Using Solid Phase Microextraction. Environmental Science & Technology 2003, 37 (24), 5597-5602. DOI: 10.1021/es0344563.
061949-76-6	cis-permethrin	5.531	1	Sediment Porewater DOM	SPME		7.1	Lee, S.; Gan, J.; Liu, W. P.; Anderson, M. A. Evaluation of Kd Underestimation Using Solid Phase Microextraction. Environmental Science & Technology 2003, 37 (24), 5597-5602. DOI: 10.1021/es0344563.
061949-76-6	cis-permethrin	4.839	2	Soil Porewater DOM	SPME	room temperature	6.3	Delgado-Moreno, L.; Wu, L.; Gan, J. Effect of Dissolved Organic Carbon on Sorption of Pyrethroids to Sediments. Environmental Science & Technology 2010, 44 (22), 8473-8478. DOI: 10.1021/es102277h.
061949-77-7	trans-Permethrin	6.276	1	Sediment Porewater DOM	SPME		6.76	Cui, X.; Gan, J. Comparing sorption behavior of pyrethroids between formulated and natural sediments. Environmental toxicology and chemistry 2013, 32 (5), 1033-1039. DOI: 10.1002/etc.2161 (acccessed 1/7/2025).
061949-77-7	trans-permethrin	5.146	1	Sediment Porewater DOM	SPME	room temperature		Bondarenko, S.; Gan, J. Simultaneous Measurement of Free and Total Concentrations of Hydrophobic Compounds. Environmental Science & Technology 2009, 43 (10), 3772-3777. DOI: 10.1021/es8037033.
061949-77-7	trans-permethrin	4.602	1	Sediment Porewater DOM	SPME	room temperature		Bondarenko, S.; Gan, J. Simultaneous Measurement of Free and Total Concentrations of Hydrophobic Compounds. Environmental Science & Technology 2009, 43 (10), 3772-3777. DOI: 10.1021/es8037033.
061949-77-7	trans-permethrin	5.398	1	Sediment Porewater DOM	SPME	room temperature		Bondarenko, S.; Gan, J. Simultaneous Measurement of Free and Total Concentrations of Hydrophobic Compounds. Environmental Science & Technology 2009, 43 (10), 3772-3777. DOI: 10.1021/es8037033.
061949-77-7	trans-permethrin	5.342	1	Sediment Porewater DOM	SPME		7.8	Lee, S.; Gan, J.; Liu, W. P.; Anderson, M. A. Evaluation of Kd Underestimation Using Solid Phase Microextraction. Environmental Science & Technology 2003, 37 (24), 5597-5602. DOI: 10.1021/es0344563.
061949-77-7	trans-permethrin	5.114	1	Sediment Porewater DOM	SPME		7.1	Lee, S.; Gan, J.; Liu, W. P.; Anderson, M. A. Evaluation of Kd Underestimation Using Solid Phase Microextraction. Environmental Science & Technology 2003, 37 (24), 5597-5602. DOI: 10.1021/es0344563.
061949-77-7	trans-permethrin	5.23	1	Sediment Porewater DOM	SPME		7.1	Lee, S.; Gan, J.; Liu, W. P.; Anderson, M. A. Evaluation of Kd Underestimation Using Solid Phase Microextraction. Environmental Science & Technology 2003, 37 (24), 5597-5602. DOI: 10.1021/es0344563.
061949-77-7	trans-permethrin	4.833	2	Soil Porewater DOM	SPME	room temperature	6.3	Delgado-Moreno, L.; Wu, L.; Gan, J. Effect of Dissolved Organic Carbon on Sorption of Pyrethroids to Sediments. Environmental Science & Technology 2010, 44 (22), 8473-8478. DOI: 10.1021/es102277h.
062796-65-0	PCB 50	5.28	3	Aldrich HA	Passive dosing	25	6.95~7.05	Schacht, V. J.; Manning, M.; Grant, S. C.; Gaus, C.; Hawker, D. W. Simultaneous quantification of humic acid-water and silanized glass-water partition constants for PCBs, PCDDs and OCDF. Chemosphere 2020, 243, 125338. DOI: https://doi.org/10.1016/j.chemosphere.2019.125338.
064461-98-9	123679-HxCDD	6.5	2	Soil Porewater DOM	LLE	20	6.8~9.1	Frankki, S.; Persson, Y.; Tysklind, M.; Skyllberg, U. Partitioning of CPs, PCDEs, and PCDD/Fs between Particulate and Experimentally Enhanced Dissolved Natural Organic Matter in a Contaminated Soil. Environmental Science & Technology 2006, 40 (21), 6668-6673. DOI: 10.1021/es0608850.
066230-04-4	Esfenvalerate	6.33	1	Sediment Porewater DOM	SPME		6.12	Cui, X.; Gan, J. Comparing sorption behavior of pyrethroids between formulated and natural sediments. Environmental toxicology and chemistry 2013, 32 (5), 1033-1039. DOI: 10.1002/etc.2161 (acccessed 1/7/2025).
066230-04-4	Esfenvalerate	6.314	1	Sediment Porewater DOM	SPME		6.76	Cui, X.; Gan, J. Comparing sorption behavior of pyrethroids between formulated and natural sediments. Environmental toxicology and chemistry 2013, 32 (5), 1033-1039. DOI: 10.1002/etc.2161 (acccessed 1/7/2025).
066230-04-4	esfenvalerate	5.568	1	Sediment Porewater DOM	SPME	room temperature		Bondarenko, S.; Gan, J. Simultaneous Measurement of Free and Total Concentrations of Hydrophobic Compounds. Environmental Science & Technology 2009, 43 (10), 3772-3777. DOI: 10.1021/es8037033.
066230-04-4	esfenvalerate	5.079	1	Sediment Porewater DOM	SPME	room temperature		Bondarenko, S.; Gan, J. Simultaneous Measurement of Free and Total Concentrations of Hydrophobic Compounds. Environmental Science & Technology 2009, 43 (10), 3772-3777. DOI: 10.1021/es8037033.
066230-04-4	esfenvalerate	5.732	1	Sediment Porewater DOM	SPME	room temperature		Bondarenko, S.; Gan, J. Simultaneous Measurement of Free and Total Concentrations of Hydrophobic Compounds. Environmental Science & Technology 2009, 43 (10), 3772-3777. DOI: 10.1021/es8037033.
067562-39-4	1234678-HpCDF	6	2	Soil Porewater DOM	LLE	20	6.8~9.1	Frankki, S.; Persson, Y.; Tysklind, M.; Skyllberg, U. Partitioning of CPs, PCDEs, and PCDD/Fs between Particulate and Experimentally Enhanced Dissolved Natural Organic Matter in a Contaminated Soil. Environmental Science & Technology 2006, 40 (21), 6668-6673. DOI: 10.1021/es0608850.
067562-40-7	124678-HxCDF	5.9	2	Soil Porewater DOM	LLE	20	6.8~9.1	Frankki, S.; Persson, Y.; Tysklind, M.; Skyllberg, U. Partitioning of CPs, PCDEs, and PCDD/Fs between Particulate and Experimentally Enhanced Dissolved Natural Organic Matter in a Contaminated Soil. Environmental Science & Technology 2006, 40 (21), 6668-6673. DOI: 10.1021/es0608850.
068085-85-8	Cyhalothrin	5.653	1	Sediment Porewater DOM	SPME		6.12	Cui, X.; Gan, J. Comparing sorption behavior of pyrethroids between formulated and natural sediments. Environmental toxicology and chemistry 2013, 32 (5), 1033-1039. DOI: 10.1002/etc.2161 (acccessed 1/7/2025).
068085-85-8	Cyhalothrin	6.121	1	Sediment Porewater DOM	SPME		6.76	Cui, X.; Gan, J. Comparing sorption behavior of pyrethroids between formulated and natural sediments. Environmental toxicology and chemistry 2013, 32 (5), 1033-1039. DOI: 10.1002/etc.2161 (acccessed 1/7/2025).
068140-48-7	ATII	3.67	3	Aldrich HA	SPME	20	7.12~7.89	Böhm, L.; Düring, R.-A. Partitioning of polycyclic musk compounds in soil and aquatic environment—experimental determination of KDOC. Journal of Soils and Sediments 2010, 10, 708-713.
068359-37-5	cyfluthrin	5.301	1	Sediment Porewater DOM	SPME	room temperature		Bondarenko, S.; Gan, J. Simultaneous Measurement of Free and Total Concentrations of Hydrophobic Compounds. Environmental Science & Technology 2009, 43 (10), 3772-3777. DOI: 10.1021/es8037033.
068359-37-5	cyfluthrin	4.778	1	Sediment Porewater DOM	SPME	room temperature		Bondarenko, S.; Gan, J. Simultaneous Measurement of Free and Total Concentrations of Hydrophobic Compounds. Environmental Science & Technology 2009, 43 (10), 3772-3777. DOI: 10.1021/es8037033.
068359-37-5	cyfluthrin	5.491	1	Sediment Porewater DOM	SPME	room temperature		Bondarenko, S.; Gan, J. Simultaneous Measurement of Free and Total Concentrations of Hydrophobic Compounds. Environmental Science & Technology 2009, 43 (10), 3772-3777. DOI: 10.1021/es8037033.
068359-37-5	cyfluthrin	4.748	1	Surface Water DOM	SPME	room temperature	7.3	Yang, W. C.; Hunter, W.; Spurlock, F.; Gan, J. Bioavailability of Permethrin and Cyfluthrin in Surface Waters with Low Levels of Dissolved Organic Matter. Journal of Environmental Quality 2007, 36 (6).
068359-37-5	cyfluthrin	4.633	1	Surface Water DOM	SPME	room temperature	6.87	Yang, W. C.; Hunter, W.; Spurlock, F.; Gan, J. Bioavailability of Permethrin and Cyfluthrin in Surface Waters with Low Levels of Dissolved Organic Matter. Journal of Environmental Quality 2007, 36 (6).
068359-37-5	cyfluthrin	4.892	1	Surface Water DOM	SPME	room temperature	7.36	Yang, W. C.; Hunter, W.; Spurlock, F.; Gan, J. Bioavailability of Permethrin and Cyfluthrin in Surface Waters with Low Levels of Dissolved Organic Matter. Journal of Environmental Quality 2007, 36 (6).
068359-37-5	cyfluthrin	5.104	1	Surface Water DOM	SPME	room temperature	7.02	Yang, W. C.; Hunter, W.; Spurlock, F.; Gan, J. Bioavailability of Permethrin and Cyfluthrin in Surface Waters with Low Levels of Dissolved Organic Matter. Journal of Environmental Quality 2007, 36 (6).
068359-37-5	cyfluthrin	4.934	1	Surface Water DOM	SPME	room temperature	7.14	Yang, W. C.; Hunter, W.; Spurlock, F.; Gan, J. Bioavailability of Permethrin and Cyfluthrin in Surface Waters with Low Levels of Dissolved Organic Matter. Journal of Environmental Quality 2007, 36 (6).
068359-37-5	cyfluthrin	5.134	1	Surface Water DOM	SPME	room temperature	7.7	Yang, W. C.; Hunter, W.; Spurlock, F.; Gan, J. Bioavailability of Permethrin and Cyfluthrin in Surface Waters with Low Levels of Dissolved Organic Matter. Journal of Environmental Quality 2007, 36 (6).
068359-37-5	cyfluthrin	4.964	1	Surface Water DOM	SPME	room temperature	7.24	Yang, W. C.; Hunter, W.; Spurlock, F.; Gan, J. Bioavailability of Permethrin and Cyfluthrin in Surface Waters with Low Levels of Dissolved Organic Matter. Journal of Environmental Quality 2007, 36 (6).
068359-37-5	cyfluthrin	5.004	1	Surface Water DOM	SPME	room temperature	6.95	Yang, W. C.; Hunter, W.; Spurlock, F.; Gan, J. Bioavailability of Permethrin and Cyfluthrin in Surface Waters with Low Levels of Dissolved Organic Matter. Journal of Environmental Quality 2007, 36 (6).
068359-37-5	cyfluthrin	4.886	1	Surface Water DOM	SPME	room temperature	7.05	Yang, W. C.; Hunter, W.; Spurlock, F.; Gan, J. Bioavailability of Permethrin and Cyfluthrin in Surface Waters with Low Levels of Dissolved Organic Matter. Journal of Environmental Quality 2007, 36 (6).
068359-37-5	cyfluthrin	4.903	1	Surface Water DOM	SPME	room temperature	6.67	Yang, W. C.; Hunter, W.; Spurlock, F.; Gan, J. Bioavailability of Permethrin and Cyfluthrin in Surface Waters with Low Levels of Dissolved Organic Matter. Journal of Environmental Quality 2007, 36 (6).
068359-37-5	cyfluthrin	5.029	1	Surface Water DOM	SPME	room temperature	6.85	Yang, W. C.; Hunter, W.; Spurlock, F.; Gan, J. Bioavailability of Permethrin and Cyfluthrin in Surface Waters with Low Levels of Dissolved Organic Matter. Journal of Environmental Quality 2007, 36 (6).
068359-37-5	cyfluthrin	4.748	2	Soil Porewater DOM	SPME	room temperature	6.3	Delgado-Moreno, L.; Wu, L.; Gan, J. Effect of Dissolved Organic Carbon on Sorption of Pyrethroids to Sediments. Environmental Science & Technology 2010, 44 (22), 8473-8478. DOI: 10.1021/es102277h.
068631-49-2	BDE-153	7.2	1	Sediment Porewater DOM	SPME	room temperature		Wang, W.; Delgado-Moreno, L.; Ye, Q.; Gan, J. Improved Measurements of Partition Coefficients for Polybrominated Diphenyl Ethers. Environmental Science & Technology 2011, 45 (4), 1521-1527. DOI: 10.1021/es103087a.
068631-49-2	BDE-153	6.43	1	Sediment Porewater DOM	SPME	room temperature		Wang, W.; Delgado-Moreno, L.; Ye, Q.; Gan, J. Improved Measurements of Partition Coefficients for Polybrominated Diphenyl Ethers. Environmental Science & Technology 2011, 45 (4), 1521-1527. DOI: 10.1021/es103087a.
068631-49-2	BDE-153	7.24	1	Sediment Porewater DOM	SPME	room temperature		Wang, W.; Delgado-Moreno, L.; Ye, Q.; Gan, J. Improved Measurements of Partition Coefficients for Polybrominated Diphenyl Ethers. Environmental Science & Technology 2011, 45 (4), 1521-1527. DOI: 10.1021/es103087a.
068631-49-2	BDE-153	7.13	1	Sediment Porewater DOM	SPME	room temperature		Wang, W.; Delgado-Moreno, L.; Ye, Q.; Gan, J. Improved Measurements of Partition Coefficients for Polybrominated Diphenyl Ethers. Environmental Science & Technology 2011, 45 (4), 1521-1527. DOI: 10.1021/es103087a.
068631-49-2	BDE-153	6.77	1	Surface Water DOM	Passive sampling	20		Khairy, M. A.; Lohmann, R. Using Polyethylene Passive Samplers To Study the Partitioning and Fluxes of Polybrominated Diphenyl Ethers in an Urban River. Environmental Science & Technology 2017, 51 (16), 9062-9071. DOI: 10.1021/acs.est.7b02418.
068631-49-2	2,2′,4,4′,5,5′-hexabromodiphenyl ether	6.81	3	Aldrich HA	Solid Phase Dosing and Sampling	20	7.03~7.06	ter Laak, T. L.; van Eijkeren, J. C. H.; Busser, F. J. M.; van Leeuwen, H. P.; Hermens, J. L. M. Facilitated Transport of Polychlorinated Biphenyls and Polybrominated Diphenyl Ethers by Dissolved Organic Matter. Environmental Science & Technology 2009, 43 (5), 1379-1385. DOI: 10.1021/es802403v.
069698-58-4	1234689-HpCDF	5.6	2	Soil Porewater DOM	LLE	20	6.8~9.1	Frankki, S.; Persson, Y.; Tysklind, M.; Skyllberg, U. Partitioning of CPs, PCDEs, and PCDD/Fs between Particulate and Experimentally Enhanced Dissolved Natural Organic Matter in a Contaminated Soil. Environmental Science & Technology 2006, 40 (21), 6668-6673. DOI: 10.1021/es0608850.
069698-60-8	123468-HxCDF	5.7	2	Soil Porewater DOM	LLE	20	6.8~9.1	Frankki, S.; Persson, Y.; Tysklind, M.; Skyllberg, U. Partitioning of CPs, PCDEs, and PCDD/Fs between Particulate and Experimentally Enhanced Dissolved Natural Organic Matter in a Contaminated Soil. Environmental Science & Technology 2006, 40 (21), 6668-6673. DOI: 10.1021/es0608850.
070362-49-1	PCB 78	6.7	3	Aldrich HA	Passive dosing	25	6.95~7.05	Schacht, V. J.; Manning, M.; Grant, S. C.; Gaus, C.; Hawker, D. W. Simultaneous quantification of humic acid-water and silanized glass-water partition constants for PCBs, PCDDs and OCDF. Chemosphere 2020, 243, 125338. DOI: https://doi.org/10.1016/j.chemosphere.2019.125338.
071998-75-9	134678-HxCDF	5.9	2	Soil Porewater DOM	LLE	20	6.8~9.1	Frankki, S.; Persson, Y.; Tysklind, M.; Skyllberg, U. Partitioning of CPs, PCDEs, and PCDD/Fs between Particulate and Experimentally Enhanced Dissolved Natural Organic Matter in a Contaminated Soil. Environmental Science & Technology 2006, 40 (21), 6668-6673. DOI: 10.1021/es0608850.
071998-76-0	12468-PeCDD	5.4	2	Soil Porewater DOM	LLE	20	6.8~9.1	Frankki, S.; Persson, Y.; Tysklind, M.; Skyllberg, U. Partitioning of CPs, PCDEs, and PCDD/Fs between Particulate and Experimentally Enhanced Dissolved Natural Organic Matter in a Contaminated Soil. Environmental Science & Technology 2006, 40 (21), 6668-6673. DOI: 10.1021/es0608850.
074472-50-7	PCB 191	6.98	3	Aldrich HA	SPME	25	7.3	Xie, M.; Yang, Z.-Y.; Bao, L.-J.; Zeng, E. Y. Equilibrium and kinetic solid-phase microextraction determination of the partition coefficients between polychlorinated biphenyl congeners and dissolved humic acid. Journal of Chromatography A 2009, 1216 (21), 4553-4559. DOI: https://doi.org/10.1016/j.chroma.2009.03.075.
074472-50-7	PCB 191	6.91	3	Aldrich HA	SPME	25	7.3	Xie, M.; Yang, Z.-Y.; Bao, L.-J.; Zeng, E. Y. Equilibrium and kinetic solid-phase microextraction determination of the partition coefficients between polychlorinated biphenyl congeners and dissolved humic acid. Journal of Chromatography A 2009, 1216 (21), 4553-4559. DOI: https://doi.org/10.1016/j.chroma.2009.03.075.
074472-52-9	PCB 204	6.88	3	Aldrich HA	Passive dosing	25	6.95~7.05	Schacht, V. J.; Manning, M.; Grant, S. C.; Gaus, C.; Hawker, D. W. Simultaneous quantification of humic acid-water and silanized glass-water partition constants for PCBs, PCDDs and OCDF. Chemosphere 2020, 243, 125338. DOI: https://doi.org/10.1016/j.chemosphere.2019.125338.
075627-02-0	124679-HxCDF	5.8	2	Soil Porewater DOM	LLE	20	6.8~9.1	Frankki, S.; Persson, Y.; Tysklind, M.; Skyllberg, U. Partitioning of CPs, PCDEs, and PCDD/Fs between Particulate and Experimentally Enhanced Dissolved Natural Organic Matter in a Contaminated Soil. Environmental Science & Technology 2006, 40 (21), 6668-6673. DOI: 10.1021/es0608850.
082291-37-0	12479-PeCDD	5.4	2	Soil Porewater DOM	LLE	20	6.8~9.1	Frankki, S.; Persson, Y.; Tysklind, M.; Skyllberg, U. Partitioning of CPs, PCDEs, and PCDD/Fs between Particulate and Experimentally Enhanced Dissolved Natural Organic Matter in a Contaminated Soil. Environmental Science & Technology 2006, 40 (21), 6668-6673. DOI: 10.1021/es0608850.
083704-36-3	13467-PeCDF	5.8	2	Soil Porewater DOM	LLE	20	6.8~9.1	Frankki, S.; Persson, Y.; Tysklind, M.; Skyllberg, U. Partitioning of CPs, PCDEs, and PCDD/Fs between Particulate and Experimentally Enhanced Dissolved Natural Organic Matter in a Contaminated Soil. Environmental Science & Technology 2006, 40 (21), 6668-6673. DOI: 10.1021/es0608850.
083704-50-1	12467-PeCDF	5.8	2	Soil Porewater DOM	LLE	20	6.8~9.1	Frankki, S.; Persson, Y.; Tysklind, M.; Skyllberg, U. Partitioning of CPs, PCDEs, and PCDD/Fs between Particulate and Experimentally Enhanced Dissolved Natural Organic Matter in a Contaminated Soil. Environmental Science & Technology 2006, 40 (21), 6668-6673. DOI: 10.1021/es0608850.
091465-08-6	λ-cyhalothrin	5.255	1	Sediment Porewater DOM	SPME	room temperature		Bondarenko, S.; Gan, J. Simultaneous Measurement of Free and Total Concentrations of Hydrophobic Compounds. Environmental Science & Technology 2009, 43 (10), 3772-3777. DOI: 10.1021/es8037033.
091465-08-6	λ-cyhalothrin	4.699	1	Sediment Porewater DOM	SPME	room temperature		Bondarenko, S.; Gan, J. Simultaneous Measurement of Free and Total Concentrations of Hydrophobic Compounds. Environmental Science & Technology 2009, 43 (10), 3772-3777. DOI: 10.1021/es8037033.
091465-08-6	λ-cyhalothrin	5.38	1	Sediment Porewater DOM	SPME	room temperature		Bondarenko, S.; Gan, J. Simultaneous Measurement of Free and Total Concentrations of Hydrophobic Compounds. Environmental Science & Technology 2009, 43 (10), 3772-3777. DOI: 10.1021/es8037033.
104215-84-1	4,4′-DDT	5.22	3	Fluka HA	TECAM	20	7.5	Ke, R.; Wang, Z.; Huang, S.; Khan, S. U. Accurate quantification of freely dissolved organochlorine pesticides in water in the presence of dissolved organic matter using triolein-embedded cellulose acetate membrane. Analytical and Bioanalytical Chemistry 2007, 387 (8), 2871-2879. DOI: 10.1007/s00216-007-1174-6.
147217-71-8	BDE-8	4.62	1	Surface Water DOM	Passive sampling	20		Khairy, M. A.; Lohmann, R. Using Polyethylene Passive Samplers To Study the Partitioning and Fluxes of Polybrominated Diphenyl Ethers in an Urban River. Environmental Science & Technology 2017, 51 (16), 9062-9071. DOI: 10.1021/acs.est.7b02418.
155999-95-4	BDE-30	5.12	1	Surface Water DOM	Passive sampling	20		Khairy, M. A.; Lohmann, R. Using Polyethylene Passive Samplers To Study the Partitioning and Fluxes of Polybrominated Diphenyl Ethers in an Urban River. Environmental Science & Technology 2017, 51 (16), 9062-9071. DOI: 10.1021/acs.est.7b02418.
189084-61-5	BDE-66	6.31	1	Sediment Porewater DOM	SPME	room temperature		Wang, W.; Delgado-Moreno, L.; Ye, Q.; Gan, J. Improved Measurements of Partition Coefficients for Polybrominated Diphenyl Ethers. Environmental Science & Technology 2011, 45 (4), 1521-1527. DOI: 10.1021/es103087a.
189084-61-5	BDE-66	6.05	1	Sediment Porewater DOM	SPME	room temperature		Wang, W.; Delgado-Moreno, L.; Ye, Q.; Gan, J. Improved Measurements of Partition Coefficients for Polybrominated Diphenyl Ethers. Environmental Science & Technology 2011, 45 (4), 1521-1527. DOI: 10.1021/es103087a.
189084-61-5	BDE-66	6.64	1	Sediment Porewater DOM	SPME	room temperature		Wang, W.; Delgado-Moreno, L.; Ye, Q.; Gan, J. Improved Measurements of Partition Coefficients for Polybrominated Diphenyl Ethers. Environmental Science & Technology 2011, 45 (4), 1521-1527. DOI: 10.1021/es103087a.
189084-61-5	BDE-66	6.78	1	Sediment Porewater DOM	SPME	room temperature		Wang, W.; Delgado-Moreno, L.; Ye, Q.; Gan, J. Improved Measurements of Partition Coefficients for Polybrominated Diphenyl Ethers. Environmental Science & Technology 2011, 45 (4), 1521-1527. DOI: 10.1021/es103087a.
189084-64-8	BDE-100	6.57	1	Sediment Porewater DOM	SPME	room temperature		Wang, W.; Delgado-Moreno, L.; Ye, Q.; Gan, J. Improved Measurements of Partition Coefficients for Polybrominated Diphenyl Ethers. Environmental Science & Technology 2011, 45 (4), 1521-1527. DOI: 10.1021/es103087a.
189084-64-8	BDE-100	6.08	1	Sediment Porewater DOM	SPME	room temperature		Wang, W.; Delgado-Moreno, L.; Ye, Q.; Gan, J. Improved Measurements of Partition Coefficients for Polybrominated Diphenyl Ethers. Environmental Science & Technology 2011, 45 (4), 1521-1527. DOI: 10.1021/es103087a.
189084-64-8	BDE-100	6.83	1	Sediment Porewater DOM	SPME	room temperature		Wang, W.; Delgado-Moreno, L.; Ye, Q.; Gan, J. Improved Measurements of Partition Coefficients for Polybrominated Diphenyl Ethers. Environmental Science & Technology 2011, 45 (4), 1521-1527. DOI: 10.1021/es103087a.
189084-64-8	BDE-100	6.99	1	Sediment Porewater DOM	SPME	room temperature		Wang, W.; Delgado-Moreno, L.; Ye, Q.; Gan, J. Improved Measurements of Partition Coefficients for Polybrominated Diphenyl Ethers. Environmental Science & Technology 2011, 45 (4), 1521-1527. DOI: 10.1021/es103087a.
189084-64-8	BDE-100	6.29	1	Surface Water DOM	Passive sampling	20		Khairy, M. A.; Lohmann, R. Using Polyethylene Passive Samplers To Study the Partitioning and Fluxes of Polybrominated Diphenyl Ethers in an Urban River. Environmental Science & Technology 2017, 51 (16), 9062-9071. DOI: 10.1021/acs.est.7b02418.
207122-15-4	BDE-154	7.1	1	Sediment Porewater DOM	SPME	room temperature		Wang, W.; Delgado-Moreno, L.; Ye, Q.; Gan, J. Improved Measurements of Partition Coefficients for Polybrominated Diphenyl Ethers. Environmental Science & Technology 2011, 45 (4), 1521-1527. DOI: 10.1021/es103087a.
207122-15-4	BDE-154	7.2	1	Sediment Porewater DOM	SPME	room temperature		Wang, W.; Delgado-Moreno, L.; Ye, Q.; Gan, J. Improved Measurements of Partition Coefficients for Polybrominated Diphenyl Ethers. Environmental Science & Technology 2011, 45 (4), 1521-1527. DOI: 10.1021/es103087a.
207122-15-4	BDE-154	7.18	1	Sediment Porewater DOM	SPME	room temperature		Wang, W.; Delgado-Moreno, L.; Ye, Q.; Gan, J. Improved Measurements of Partition Coefficients for Polybrominated Diphenyl Ethers. Environmental Science & Technology 2011, 45 (4), 1521-1527. DOI: 10.1021/es103087a.
207122-15-4	BDE-154	6.91	1	Surface Water DOM	Passive sampling	20		Khairy, M. A.; Lohmann, R. Using Polyethylene Passive Samplers To Study the Partitioning and Fluxes of Polybrominated Diphenyl Ethers in an Urban River. Environmental Science & Technology 2017, 51 (16), 9062-9071. DOI: 10.1021/acs.est.7b02418.
207122-16-5	BDE-183	7.38	1	Sediment Porewater DOM	SPME	room temperature		Wang, W.; Delgado-Moreno, L.; Ye, Q.; Gan, J. Improved Measurements of Partition Coefficients for Polybrominated Diphenyl Ethers. Environmental Science & Technology 2011, 45 (4), 1521-1527. DOI: 10.1021/es103087a.
207122-16-5	BDE-183	8.02	1	Sediment Porewater DOM	SPME	room temperature		Wang, W.; Delgado-Moreno, L.; Ye, Q.; Gan, J. Improved Measurements of Partition Coefficients for Polybrominated Diphenyl Ethers. Environmental Science & Technology 2011, 45 (4), 1521-1527. DOI: 10.1021/es103087a.
207122-16-5	BDE-183	7.36	1	Surface Water DOM	Passive sampling	20		Khairy, M. A.; Lohmann, R. Using Polyethylene Passive Samplers To Study the Partitioning and Fluxes of Polybrominated Diphenyl Ethers in an Urban River. Environmental Science & Technology 2017, 51 (16), 9062-9071. DOI: 10.1021/acs.est.7b02418.
207122-16-5	2,2′,3,4,4′,5′,6′-heptabromodiphenyl ether	6.74	3	Aldrich HA	Solid Phase Dosing and Sampling	20	7.03~7.06	ter Laak, T. L.; van Eijkeren, J. C. H.; Busser, F. J. M.; van Leeuwen, H. P.; Hermens, J. L. M. Facilitated Transport of Polychlorinated Biphenyls and Polybrominated Diphenyl Ethers by Dissolved Organic Matter. Environmental Science & Technology 2009, 43 (5), 1379-1385. DOI: 10.1021/es802403v.
243982-82-3	BDE-49	5.65	1	Surface Water DOM	Passive sampling	20		Khairy, M. A.; Lohmann, R. Using Polyethylene Passive Samplers To Study the Partitioning and Fluxes of Polybrominated Diphenyl Ethers in an Urban River. Environmental Science & Technology 2017, 51 (16), 9062-9071. DOI: 10.1021/acs.est.7b02418.
a DOM origin: 1 = Natural Aquatic DOM, 2 = Natural Terrestrial DOM, 3 = Commercial DOM, 4 = Other DOM
b KDOC measurement methods: CF-MA-HS-SPME = complexation–flocculation combined with microwave-assisted headspace solid-phase microextraction, FQ = fluorescence quenching, LLE = liquid-liquid extraction, nd-SPME = negligible-depletion solid-phase microextraction, POM-SPE-C12 = polyoxymethylene-solid phase extraction 12C, POM-SPE-C14 = polyoxymethylene-solid phase extraction 14C, SPD&S = solid-phas…

## Sheet: Table S2
Table S2. 27 key descriptors obtained after stepsize regression.
Descriptor	Source	Descriptions
CrippenLogP	PaDEL	Estimates the hydrophobicity (logP value) of a molecule using Crippen's atomic contribution method.
SlogP_VSA1	RDKit	Combines the molecular surface area (VSA) and hydrophobicity (SlogP) to describe specific regions of molecular surface contributions.
ErGFP285	RDKit	Extended reduced graph fingerprint capturing pharmacophoric features and topological properties relevant to ligand-receptor interactions.
FCFPs2048_1787	RDKit	Fragment-based fingerprint focusing on circular substructures and their connectivity.
RDKFP97	RDKit	RDKit molecular fingerprint generated from atom paths up to a specific path length
RDKFP1999	RDKit	RDKit molecular fingerprint generated from atom paths up to a specific path length
ExtFP215	RDKit	Extended fingerprint that captures larger molecular fragments compared to path-based methods.
SECFP1727	RDKit	Substructure-enhanced circular fingerprint that encodes chemical environments around atoms
ExtFP979	RDKit	Extended fingerprint that captures larger molecular fragments compared to path-based methods.
RDKFP870	RDKit	RDKit molecular fingerprint generated from atom paths up to a specific path length
SECFP1805	RDKit	Substructure-enhanced circular fingerprint that encodes chemical environments around atoms
PharmFP16632	RDKit	Pharmacophore fingerprint encoding features critical for biological activity, such as hydrogen bond donors and acceptors.
SECFP617	RDKit	Substructure-enhanced circular fingerprint that encodes chemical environments around atoms
MATS2m	PaDEL	Matrix algebra-based topological descriptor, representing atomic interactions through distance matrices.
PatternFP730	RDKit	A variant of pattern-based fingerprint focusing on common atom-bond substructures.
PatternFP654	RDKit	A variant of pattern-based fingerprint focusing on common atom-bond substructures.
FuncFP3064	RDKit	Functional group fingerprint that captures the presence of specific chemical functionalities in the molecule.
SECFP1315	RDKit	Substructure-enhanced circular fingerprint that encodes chemical environments around atoms
RDKFP1925	RDKit	RDKit molecular fingerprint generated from atom paths up to a specific path length
FuncFP2428	RDKit	Extended functional group fingerprint capturing broader chemical functionalities.
GraphFP554	RDKit	Encodes molecular structure based on the graph theory representation of molecules.
RDKFP834	RDKit	RDKit molecular fingerprint generated from atom paths up to a specific path length
Mor29m	RDKit	Moran autocorrelation descriptor capturing molecular mass distribution and spatial arrangement.
PatternFP1783	RDKit	A variant of pattern-based fingerprint focusing on common atom-bond substructures.
RDKFP629	RDKit	RDKit molecular fingerprint generated from atom paths up to a specific path length
ECFPs1024_998	RDKit	Extended connectivity fingerprint capturing local atomic environments for molecular properties.
RDKFP2034	RDKit	RDKit molecular fingerprint generated from atom paths up to a specific path length

## Sheet: Table S3
Table S3. Comparisions of descriptors and evaluation metrics for the four optimized algorithms of each model after hyperparameter tuning.
Model	Algorithm	Descriptor number	Descriptors	R2train	R2valid	R2test	RMSEtrain	RMSEvalid	RMSEtest	Hyperparameters
All DOM	DT	7	['Onehot2', 'Onehot3', 'CrippenLogP', 'RDKFP1999', 'MATS2m', 'PatternFP654', 'Mor29m']	0.850557	0.714437	0.696919	0.398819	0.541774	0.606776	{'max_depth': 9, 'max_features': 11, 'min_samples_leaf': 1, 'min_samples_split': 4, 'min_weight_fraction_leaf': 0}
	XGBoost	7	['Onehot3', 'CrippenLogP', 'SlogP_VSA1', 'FCFPs2048_1787', 'RDKFP97', 'MATS2m', 'FuncFP3064']	0.851987	0.741789	0.67728	0.396906	0.516694	0.62617	{'learning_rate': 0.1, 'max_depth': 7, 'min_child_weight': 1, 'n_estimators': 50, 'subsample': 0.6}
	GBRT	7	['Onehot2', 'Onehot3', 'CrippenLogP', 'SlogP_VSA1', 'MATS2m', 'FuncFP3064', 'Mor29m']	0.887443	0.742968	0.723435	0.346118	0.51305	0.579571	{'learning_rate': 0.1, 'max_depth': 4, 'min_samples_leaf': 1, 'n_estimators': 100, 'subsample': 0.8}
	RF	7	['Onehot2', 'Onehot3', 'CrippenLogP', 'SlogP_VSA1', 'ErGFP285', 'MATS2m', 'Mor29m']	0.879828	0.736424	0.719021	0.357635	0.51948	0.584187	{'max_depth': 9, 'max_samples': 0.8, 'min_samples_leaf': 1, 'min_samples_split': 2, 'n_estimators': 300}
Natural Aquatic DOM	DT	5	['CrippenLogP', 'SlogP_VSA1', 'ErGFP285', 'RDKFP1925', 'Mor29m']	0.652699	0.562102	0.59786	0.503507	0.564962	0.58682	{'max_depth': 3, 'max_features': 11, 'min_samples_leaf': 3, 'min_samples_split': 2, 'min_weight_fraction_leaf': 0}
	XGBoost	4	['CrippenLogP', 'SlogP_VSA1', 'GraphFP554', 'RDKFP2034']	0.742428	0.586718	0.621044	0.434685	0.543971	0.569523	{'learning_rate': 0.1, 'max_depth': 5, 'min_child_weight': 5, 'n_estimators': 100, 'subsample': 0.6}
	GBRT	5	['CrippenLogP', 'SlogP_VSA1', 'MATS2m', 'PatternFP730', 'Mor29m']	0.771413	0.601988	0.629204	0.408488	0.535431	0.563312	{'learning_rate': 0.1, 'max_depth': 2, 'min_samples_leaf': 5, 'n_estimators': 100, 'subsample': 0.8}
	RF	4	['CrippenLogP', 'SlogP_VSA1', 'MATS2m', 'Mor29m']	0.716318	0.581998	0.607119	0.456185	0.554171	0.579972	{'max_depth': 5, 'max_samples': 0.8, 'min_samples_leaf': 3, 'min_samples_split': 2, 'n_estimators': 100}
Natural Terrestrial DOM	DT	5	['CrippenLogP', 'SlogP_VSA1', 'ErGFP285', 'PatternFP730', 'Mor29m']	0.683339	0.50695	0.51403	0.416797	0.516053	0.500402	{'max_depth': 5, 'max_features': 11, 'min_samples_leaf': 5, 'min_samples_split': 2, 'min_weight_fraction_leaf': 0}
	XGBoost	4	['CrippenLogP', 'MATS2m', 'PatternFP730', 'PatternFP1783']	0.770199	0.664942	0.694761	0.356468	0.430463	0.395486	{'learning_rate': 0.1, 'max_depth': 3, 'min_child_weight': 7, 'n_estimators': 100, 'subsample': 1}
	GBRT	5	['CrippenLogP', 'ErGFP285', 'MATS2m', 'PatternFP730', 'Mor29m']	0.798116	0.676081	0.667731	0.332796	0.420939	0.412796	{'learning_rate': 0.1, 'max_depth': 8, 'min_samples_leaf': 7, 'n_estimators': 100, 'subsample': 0.8}
	RF	4	['CrippenLogP', 'ErGFP285', 'MATS2m', 'PatternFP1783']	0.759546	0.62922	0.566444	0.364636	0.457893	0.472266	{'max_depth': None, 'max_samples': 0.8, 'min_samples_leaf': 1, 'min_samples_split': 2, 'n_estimators': 300}
Commercial DOM	DT	5	['CrippenLogP', 'MATS2m', 'PatternFP730', 'FuncFP3064', 'Mor29m']	0.944644	0.815926	0.897914	0.30816	0.562197	0.453412	{'max_depth': 7, 'max_features': 11, 'min_samples_leaf': 1, 'min_samples_split': 8, 'min_weight_fraction_leaf': 0}
	XGBoost	6	['CrippenLogP', 'ExtFP979', 'PatternFP730', 'PatternFP654', 'FuncFP3064', 'GraphFP554']	0.963233	0.86031	0.8723	0.250507	0.492281	0.507244	{'learning_rate': 0.1, 'max_depth': 5, 'min_child_weight': 1, 'n_estimators': 100, 'subsample': 0.8}
	GBRT	5	['CrippenLogP', 'MATS2m', 'PatternFP730', 'FuncFP3064', 'Mor29m']	0.974686	0.857846	0.880788	0.208387	0.493336	0.490056	{'learning_rate': 0.1, 'max_depth': 4, 'min_samples_leaf': 1, 'n_estimators': 100, 'subsample': 0.8}
	RF	6	['CrippenLogP', 'RDKFP1999', 'MATS2m', 'PatternFP730', 'FuncFP3064', 'Mor29m']	0.958024	0.849318	0.886844	0.267664	0.500438	0.482759	{'max_depth': 9, 'max_samples': 0.8, 'min_samples_leaf': 1, 'min_samples_split': 2, 'n_estimators': 100}

## Sheet: Table S4
Table S4. The descriptors and corrsponding model parameter settings used in the best-performing models from All DOM, Natural Aquatic DOM, Natural Terrestrial DOM, and Commercial DOM
Model	Descriptor number	Descriptors								Parameter setting
										alpha	ccp_alpha	criterion	init	learning_rate	loss	max_depth	max_features	max_leaf_nodes	min_impurity_decrease	min_samples_leaf	min_samples_split	min_weight_fraction_leaf	n_estimators	n_iter_no_change	random_state	subsample	tol	validation_fraction	verbose	warm_start
All DOM	7	['Onehot2', 'Onehot3', 'CrippenLogP', 'SlogP_VSA1', 'MATS2m', 'FuncFP3064', 'Mor29m']								0.9	0	friedman_mse	None	0.1	squared_error	4	None	None	0	1	2	0	100	None	123	0.8	0.0001	0.1	0	FALSE
Natural Aquatic DOM	5	['CrippenLogP', 'SlogP_VSA1', 'MATS2m', 'PatternFP730', 'Mor29m']								0.9	0	friedman_mse	None	0.1	squared_error	2	None	None	0	5	2	0	100	None	123	0.8	0.0001	0.1	0	FALSE
Natural Terrestrial DOM	5	['CrippenLogP', 'ErGFP285', 'MATS2m', 'PatternFP730', 'Mor29m']								0.9	0	friedman_mse	None	0.1	squared_error	8	None	None	0	7	2	0	100	None	123	0.8	0.0001	0.1	0	FALSE
Commercial DOM	5	['CrippenLogP', 'MATS2m', 'PatternFP730', 'FuncFP3064', 'Mor29m']								0.9	0	friedman_mse	None	0.1	squared_error	4	None	None	0	1	2	0	100	None	123	0.8	0.0001	0.1	0	FALSE

## Sheet: Table S5
Table S5. Comparisons of machine learning models and pp-LFER models based on similar datasets.
Origin	Modela	Descriptor number	R2train	R2valid	R2test	RMSEtrain	RMSEvalid	RMSEtest
All DOM	GBRT	7	0.887	0.743	0.723	0.346	0.513	0.58
	pp-LFER	5	0.829	-	-	0.534	-	0.56
Natural Aquatic DOM	GBRT	5	0.771	0.602	0.629	0.408	0.535	0.563
	pp-LFER	5	0.522	-	-	0.895	-	0.704
Natural Terrestrial DOM	GBRT	5	0.798	0.676	0.668	0.333	0.421	0.413
	pp-LFER	5	0.732	-	-	0.523	-	0.496
Commercial DOM	GBRT	5	0.975	0.858	0.881	0.208	0.493	0.49
	pp-LFER	5	0.81	-	-	0.621	-	0.721
a The statistics for pp-LFER models were retried from the Supporting Information "Improved Predictions of Dissolved Organic Carbon−Water Partitioning and Unveiling the Chemodiversity of Dissolved Organic Matter" by Songlin Shi, Yuzhen Liang, Shan Jiang, and Zhenqing Shi
